# Supplementary material for: Efficient in situ three-component formation of chiral oxazoline-Schiff base copper(ii) complexes: towards combinatorial library of chiral catalysts for asymmetric Henry reaction
Source: Royal Society of Chemistry journal article supplement (doi:10.1039/b923835b), 2010-01-01
Supplement: b923835b.pdf [file b923835b.pdf]

# Efficient *in situ* Three-component Formation of Chiral Oxazoline-Schiff Base Copper(II) Complexes: Towards Combinatorial Library of Chiral Catalysts for Asymmetric Henry Reaction

Wen Yang,<sup>a</sup> Han Liu,<sup>b</sup> Da-Ming Du<sup>\*a</sup>

<sup>a</sup>School of Chemical Engineering and Environment, Beijing Institute of Technology,  
Beijing 100081, People's Republic of China

<sup>b</sup>Beijing National Laboratory for Molecular Sciences (BNLMS), College of Chemistry and  
Molecular Engineering, Peking University, Beijing 100871, Peoples's Republic of China  
E-mail: [dudm@bit.edu.cn](mailto:dudm@bit.edu.cn)

## Supporting information

### Synthesis of 2-(2-aminophenyl)oxazolines 1a–d

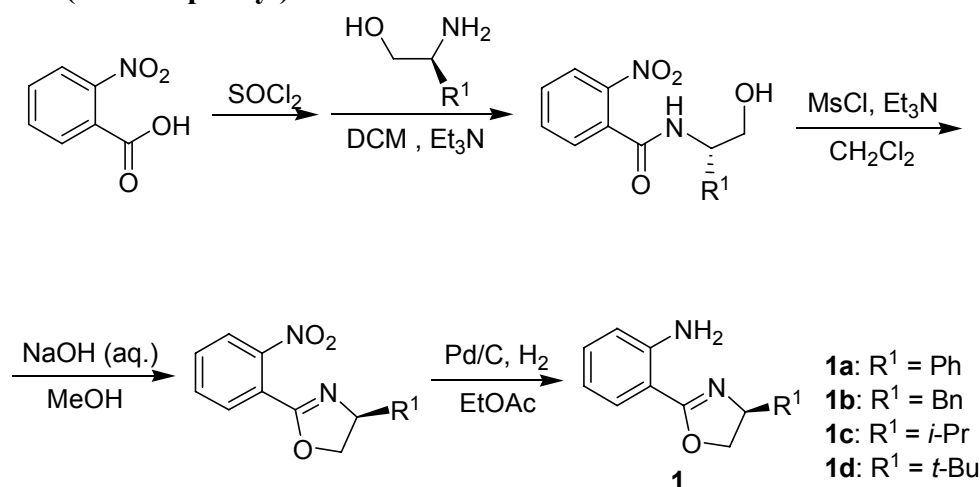

### Synthesis of nitrobenzamides

A solution of 2-nitrobenzoic acid (835 mg, 5.0 mmol) and thionyl chloride (5 mL) was refluxed for 3 h. The excess thionyl chloride was removed under reduced pressure to afford 2-nitrobenzoyl chloride. The above chloride in CH<sub>2</sub>Cl<sub>2</sub> (25 mL) was added dropwise to a solution of chiral amino alcohol (5.0 mmol) and Et<sub>3</sub>N (1.8 mL, 12.5 mmol) in CH<sub>2</sub>Cl<sub>2</sub> (20 mL) at 0 °C, then stirred at room temperature for 10 h. The reaction mixture was successively washed with saturated NH<sub>4</sub>Cl (aq), HCl (1M), saturated NaHCO<sub>3</sub> (aq) and brine. The organic layer was dried over anhydrous Na<sub>2</sub>SO<sub>4</sub>, concentrated and purified by silica gel column chromatography (ethyl acetate-petroleum ether 1:1 *V/V*) to afford the nitrobenzamides.

### *N*-((*S*)-2-Hydroxy-1-phenylethyl)-2-nitrobenzamide

White solid, yield 86%; m.p. 138–139 °C.  $[\alpha]_{\text{D}}^{25} = +27.2$  ( $c = 0.94$ ,  $\text{CH}_2\text{Cl}_2$ );  $^1\text{H}$  NMR (300M,  $\text{d}^6$ -DMSO):  $\delta = 9.07$  (d,  $J = 8.1$  Hz, 1H), 8.03 (d,  $J = 7.8$  Hz, 1H), 7.80 (t,  $J = 7.5$  Hz, 1H), 7.72–7.66 (m, 2H), 7.41–7.26 (m, 5H), 5.00 (dd,  $J = 6.9$  Hz,  $J = 14.1$  Hz, 1H), 4.93 (t,  $J = 5.7$  Hz, 1H), 3.71–3.58 (m, 2H);  $^{13}\text{C}$  NMR (75M,  $\text{d}^6$ -DMSO):  $\delta = 165.0$ , 147.0, 140.5, 133.4, 132.5, 130.6, 129.2, 128.0, 127.0, 126.8, 123.9, 64.4, 55.5; IR (KBr):  $\nu$  3315, 2960, 1648, 1575, 1531, 1453, 1350, 1318, 1052, 853, 735, 704  $\text{cm}^{-1}$ ; HR-ESIMS:  $m/z$  cacl'd for  $\text{C}_{15}\text{H}_{15}\text{N}_2\text{O}_4$  (M+H): 287.09871. Found: 287.10263.

#### ***N*-((*S*)-1-Hydroxymethyl-2-phenylethyl)-2-nitrobenzamide**

Pale yellow oil, yield 98%.  $[\alpha]_{\text{D}}^{25} = -6.8$  ( $c = 1.68$ ,  $\text{CH}_2\text{Cl}_2$ );  $^1\text{H}$  NMR (300 MHz,  $\text{CDCl}_3$ ):  $\delta = 7.83$  (d,  $J = 7.8$  Hz, 1H), 7.48–7.36 (m, 2H), 7.28–7.15 (m, 5H), 6.93 (d,  $J = 8.4$  Hz, 1H), 4.21–4.19 (m, 1H), 3.59 (dd,  $J = 3.3$  Hz,  $J = 10.8$  Hz, 1H), 3.48 (dd,  $J = 4.5$  Hz,  $J = 11.1$  Hz, 1H), 3.37 (br s, 1H), 2.84 (d,  $J = 6.9$  Hz, 2H);  $^{13}\text{C}$  NMR (75 MHz,  $\text{CDCl}_3$ ):  $\delta = 166.8$ , 145.8, 137.6, 133.6, 132.4, 130.1, 129.1, 128.5, 128.4, 126.4, 124.1, 62.7, 53.1, 36.3; IR (KBr):  $\nu$  3467, 2958, 1624, 1549, 1523, 1476, 1340, 1294, 1096, 825, 751  $\text{cm}^{-1}$ ; HR-ESIMS:  $m/z$  cacl'd for  $\text{C}_{16}\text{H}_{17}\text{N}_2\text{O}_4$  (M+H): 301.11436. Found: 301.11828.

#### ***N*-((*S*)-1-Hydroxymethyl-3-methylbutyl)-2-nitrobenzamide**

White solid, yield 89%; m.p. 108–109 °C.  $[\alpha]_{\text{D}}^{25} = -20.2$  ( $c = 1.08$ ,  $\text{CH}_2\text{Cl}_2$ );  $^1\text{H}$  NMR (300M,  $\text{CDCl}_3$ ):  $\delta = 8.03$  (d,  $J = 7.8$  Hz, 1H), 7.66 (t,  $J = 7.2$  Hz, 1H), 7.58–7.51 (m, 2H), 6.25 (d,  $J = 7.8$  Hz, 1H), 3.92–3.73 (m, 3H), 2.37 (br s, 1H), 2.02–1.91 (m, 1H), 1.02 (d,  $J = 7.2$  Hz, 6H);  $^{13}\text{C}$  NMR (75M,  $\text{d}^6$ -DMSO):  $\delta = 165.4$ , 146.9, 133.3, 133.1, 130.3, 129.2, 123.8, 60.9, 56.3, 28.1, 19.6, 17.9; IR (KBr):  $\nu$  3429, 3320, 2963, 1627, 1548, 1523, 1417, 1351, 1074, 853, 789, 698  $\text{cm}^{-1}$ ; HR-ESIMS:  $m/z$  cacl'd for  $\text{C}_{12}\text{H}_{17}\text{N}_2\text{O}_4$  (M+H): 253.11436. Found: 253.11828.

#### ***N*-((*S*)-1-Hydroxymethyl-2,2-dimethylpropyl)-2-nitrobenzamide**

White solid, yield 85%; m.p. 137–138 °C.  $[\alpha]_{\text{D}}^{25} = -60.5$  ( $c = 3.65$ , EtOH);  $^1\text{H}$  NMR (300M,  $\text{CDCl}_3$ ):  $\delta = 8.04$  (d,  $J = 7.8$  Hz, 1H), 7.68 (t,  $J = 7.5$  Hz, 1H), 7.60–7.54 (m, 2H), 6.17 (d,  $J = 9.0$  Hz, 1H), 4.08–4.01 (m, 1H), 3.95 (dd,  $J = 3.6$  Hz,  $J = 11.4$  Hz, 1H), 3.70 (dd,  $J = 7.2$  Hz,  $J = 11.4$  Hz, 1H), 2.25 (br s, 1H), 1.03 (s, 9H);  $^{13}\text{C}$  NMR (75M,  $\text{d}^6$ -DMSO):  $\delta = 165.6$ , 147.1, 133.14, 133.11, 130.3, 129.4, 123.7, 60.5, 59.5, 33.9, 26.9; IR (KBr):  $\nu$  3420, 3230, 3076, 2957, 1645, 1562, 1540, 1469, 1367, 1315, 1048, 871, 779, 728, 696  $\text{cm}^{-1}$ ; HR-ESIMS:  $m/z$  cacl'd for  $\text{C}_{13}\text{H}_{19}\text{N}_2\text{O}_4$  (M+H): 267.13001. Found: 267.13393.

#### **Synthesis of 2-(2-nitrophenyl)oxazolines**

To a ice-cold solution of nitrobenzamide (4.0 mmol) and  $\text{Et}_3\text{N}$  (1.4 mL, 10.0 mmol) in  $\text{CH}_2\text{Cl}_2$  (30 mL) was added methanesulfonyl chloride (0.39 mL, 0.5 mmol) via a syringe. After stirred for 6 h at room temperature, the reaction mixture was concentrated under reduced pressure to afford the crude product. The crude product was dissolved in methanol (15 mL), and a solution of NaOH (0.5 g) in water (5 mL) was added. The reaction mixture was refluxed for 3 h, then cooled to room temperature. The methanol was removed under reduced pressure and the residue was extracted with  $\text{CH}_2\text{Cl}_2$  (3×25 mL). The combined organic layer was washed with brine, dried over anhydrous  $\text{Na}_2\text{SO}_4$ , concentrated and purified by silica gel column chromatography (ethyl acetate-petroleum ether 1:10 *V/V*) to afford the 2-(2-nitrophenyl)oxazolines.

#### **(*S*)- 4-Phenyl-2-(2-nitrophenyl)- oxazoline**

Pale yellow oil, yield 92%.  $[\alpha]_{\text{D}}^{25} = -50.1$  ( $c = 1.23$ ,  $\text{CH}_2\text{Cl}_2$ );  $^1\text{H}$  NMR (200 MHz,  $\text{CDCl}_3$ ):  $\delta = 7.93\text{--}7.86$  (m, 2H),  $7.66\text{--}7.60$  (m, 2H),  $7.38\text{--}7.27$  (m, 5H),  $5.40$  (dd,  $J = 9.0$  Hz,  $J = 10.0$  Hz, 1H),  $4.80$  (dd,  $J = 8.4$  Hz,  $J = 10.2$  Hz, 1H),  $4.28$  (t,  $J = 8.6$  Hz, 1H);  $^{13}\text{C}$  NMR (50 MHz,  $\text{CDCl}_3$ ):  $\delta = 162.3$ ,  $149.1$ ,  $141.5$ ,  $132.5$ ,  $131.5$ ,  $131.2$ ,  $128.7$ ,  $127.7$ ,  $126.8$ ,  $123.9$ ,  $123.1$ ,  $75.8$ ,  $70.4$ ; IR (KBr):  $\nu$  3065, 1642, 1529, 1349, 1039, 850, 789, 701  $\text{cm}^{-1}$ ; HR-ESIMS:  $m/z$  cacl'd for  $\text{C}_{15}\text{H}_{13}\text{N}_2\text{O}_3$  (M+H): 269.08815. Found: 269.09207.

#### **(S)-4-Benzyl-2-(2-nitrophenyl)-oxazoline**

White solid, yield 89%; m.p. 55–56 °C.  $[\alpha]_{\text{D}}^{25} = +9.0$  ( $c = 1.15$ ,  $\text{CH}_2\text{Cl}_2$ );  $^1\text{H}$  NMR (200 MHz,  $\text{CDCl}_3$ ):  $\delta = 7.87\text{--}7.76$  (m, 2H),  $7.66\text{--}7.56$  (m, 2H),  $7.32\text{--}7.22$  (m, 5H),  $4.65\text{--}4.53$  (m, 1H),  $4.37$  (t,  $J = 8.8$  Hz, 1H),  $4.16$  (dd,  $J = 7.4$  Hz,  $J = 8.4$  Hz, 1H),  $3.21$  (dd,  $J = 5.6$  Hz,  $J = 13.8$  Hz, 1H),  $2.81$  (dd,  $J = 8.2$  Hz,  $J = 13.8$  Hz, 1H);  $^{13}\text{C}$  NMR (50 MHz,  $\text{CDCl}_3$ ):  $\delta = 161.3$ ,  $149.1$ ,  $137.6$ ,  $132.3$ ,  $131.3$ ,  $130.9$ ,  $129.2$ ,  $128.5$ ,  $126.5$ ,  $123.8$ ,  $123.3$ ,  $72.8$ ,  $68.1$ ,  $41.2$ ; IR (KBr):  $\nu$  3060, 1659, 1605, 1532, 1357, 1060, 948, 852, 754, 700  $\text{cm}^{-1}$ ; HR-ESIMS:  $m/z$  cacl'd for  $\text{C}_{16}\text{H}_{15}\text{N}_2\text{O}_3$  (M+H): 235.10380. Found: 235.10772.

#### **(S)-4-(1-Methylethyl)-2-(2-nitrophenyl)oxazoline**

Pale yellow oil, yield 94%.  $[\alpha]_{\text{D}}^{25} = -66.8$  ( $c = 1.87$ ,  $\text{CH}_2\text{Cl}_2$ );  $^1\text{H}$  NMR (200 MHz,  $\text{CDCl}_3$ ):  $\delta = 7.86\text{--}7.80$  (m, 2H),  $7.64\text{--}7.57$  (m, 2H),  $4.30$  (dd,  $J = 5.0$  Hz,  $J = 6.6$  Hz, 1H),  $4.19\text{--}4.10$  (m, 2H),  $1.98\text{--}1.82$  (m, 1H),  $1.04$  (d,  $J = 6.8$  Hz),  $0.97$  (d,  $J = 6.8$  Hz);  $^{13}\text{C}$  NMR (50 MHz,  $\text{CDCl}_3$ ):  $\delta = 160.7$ ,  $149.0$ ,  $132.2$ ,  $131.2$ ,  $130.9$ ,  $123.7$ ,  $123.3$ ,  $72.9$ ,  $71.1$ ,  $32.5$ ,  $18.6$ ,  $18.2$ ; IR (KBr):  $\nu$  2961, 1662, 1608, 1536, 1357, 1063, 955, 852, 784, 705  $\text{cm}^{-1}$ ; HR-ESIMS:  $m/z$  cacl'd for  $\text{C}_{12}\text{H}_{15}\text{N}_2\text{O}_3$  (M+H): 283.10380. Found: 283.10772.

#### **(S)-4-(1,1-Dimethylethyl)-2-(2-nitrophenyl)oxazoline**

Pale yellow oil, yield 90%.  $[\alpha]_{\text{D}}^{25} = -92.7$  ( $c = 1.09$ ,  $\text{CH}_2\text{Cl}_2$ );  $^1\text{H}$  NMR (200 MHz,  $\text{CDCl}_3$ ):  $\delta = 7.86\text{--}7.80$  (m, 2H),  $7.64\text{--}7.57$  (m, 2H),  $4.37$  (dd,  $J = 8.4$  Hz,  $J = 10.2$  Hz, 1H),  $4.24$  (t,  $J = 8.2$  Hz, 1H),  $4.08$  (dd,  $J = 8.2$  Hz,  $J = 10.2$  Hz, 1H),  $0.98$  (s, 9H);  $^{13}\text{C}$  NMR (50 MHz,  $\text{CDCl}_3$ ):  $\delta = 160.7$ ,  $149.1$ ,  $132.3$ ,  $131.2$ ,  $131.0$ ,  $123.7$ ,  $123.4$ ,  $76.6$ ,  $69.7$ ,  $34.0$ ,  $25.9$ ; IR (KBr):  $\nu$  2956, 1663, 1536, 1357, 1062, 955, 851, 782, 705  $\text{cm}^{-1}$ ; HR-ESIMS:  $m/z$  cacl'd for  $\text{C}_{13}\text{H}_{17}\text{N}_2\text{O}_3$  (M+H): 249.11945. Found: 249.12337.

#### **Synthesis of 2-(2-aminophenyl)oxazolines 1a–d**

To a solution of 2-(2-nitrophenyl)oxazoline (3.0 mmol) in EtOAc (25 mL) was added Pd/C (50 mg). The reaction was placed under an atmosphere of  $\text{H}_2$  in a rubber balloon and stirred for 10 h. The reaction mixture was filtered through Celite to remove Pd/C, concentrated and purified by silica gel column chromatography (ethyl acetate-petroleum ether 1:20 *V/V*) to afford the 2-(2-aminophenyl)oxazolines.

#### **(S)-2-(2-Aminophenyl)-4-phenyloxazoline 1a**

White solid, yield 91%; m.p. 74–75 °C.  $[\alpha]_{\text{D}}^{25} = +207.6$  ( $c = 0.50$ ,  $\text{CH}_2\text{Cl}_2$ );  $^1\text{H}$  NMR (300 MHz,  $\text{CDCl}_3$ ):  $\delta = 7.77$  (d,  $J = 8.1$  Hz, 1H),  $7.36\text{--}7.18$  (m, 6H),  $6.69\text{--}6.65$  (m, 2H),  $6.11$  (br, 2H),  $5.42$  (t,  $J = 9.0$  Hz, 1H),  $4.65$  (t,  $J = 9.0$  Hz, 1H),  $4.10$  (t,  $J = 8.1$  Hz, 1H);  $^{13}\text{C}$  NMR (75 MHz,  $\text{CDCl}_3$ ):  $\delta = 165.0$ ,  $148.8$ ,  $142.7$ ,  $132.2$ ,  $129.7$ ,  $128.6$ ,  $127.5$ ,  $126.6$ ,  $116.0$ ,  $115.7$ ,  $108.6$ ,  $73.0$ ,  $70.1$ . lit.<sup>1</sup> m.p. 74–77 °C.  $[\alpha]_{\text{D}} = +185.1$  ( $c = 1.0$ ,  $\text{CHCl}_3$ ).

**(S)-2-(2-Aminophenyl)-4-benzyloxazoline 1b**

White solid, yield 91%; m.p. 57–58 °C.  $[\alpha]_{\text{D}}^{25} = +43.3$  ( $c = 0.51$ ,  $\text{CH}_2\text{Cl}_2$ );  $^1\text{H}$  NMR (300 MHz,  $\text{CDCl}_3$ ):  $\delta = 7.68$  (d,  $J = 7.8$  Hz, 1H), 7.32–7.16 (m, 6H), 6.68–6.61 (m, 2H), 6.08 (br s, 2H), 4.64–4.53 (m, 1H), 4.25 (t,  $J = 8.7$  Hz, 1H), 4.00 (t,  $J = 7.8$  Hz, 1H), 3.11 (dd,  $J = 6.0$  Hz,  $J = 13.5$  Hz, 1H), 2.74 (dd,  $J = 8.1$  Hz,  $J = 13.5$  Hz, 1H);  $^{13}\text{C}$  NMR (75 MHz,  $\text{CDCl}_3$ ):  $\delta = 164.0$ , 148.6, 138.3, 132.0, 129.5, 129.1, 128.4, 126.3, 115.9, 115.6, 108.9, 70.2, 68.0, 42.2. lit.<sup>1</sup> m.p. 56–57 °C.  $[\alpha]_{\text{D}} = +24.7$  ( $c = 1.0$ ,  $\text{CHCl}_3$ ).

**(S)-2-(2-Aminophenyl)-4-isopropylloxazoline 1c**

White solid, yield 91%; m.p. 64–65 °C.  $[\alpha]_{\text{D}}^{25} = +23.2$  ( $c = 0.50$ ,  $\text{CH}_2\text{Cl}_2$ );  $^1\text{H}$  NMR (300 MHz,  $\text{CDCl}_3$ ):  $\delta = 7.67$  (d,  $J = 7.8$  Hz, 1H), 7.24–7.16 (m, 1H), 6.69–6.62 (m, 2H), 5.98 (br, 2H), 4.30 (t,  $J = 8.4$  Hz, 1H), 4.14–4.06 (m, 1H), 3.99 (t,  $J = 7.8$  Hz, 1H), 1.81–1.72 (m, 1H), 1.02 (d,  $J = 6.6$  Hz, 1H), 0.93 (d,  $J = 6.6$  Hz, 1H);  $^{13}\text{C}$  NMR (75 MHz,  $\text{CDCl}_3$ ):  $\delta = 163.5$ , 148.5, 131.9, 129.5, 115.9, 115.6, 109.1, 72.8, 68.7, 33.1, 18.9, 18.5. lit.<sup>1</sup> m.p. 64–65 °C.  $[\alpha]_{\text{D}} = +10.2$  ( $c = 1.0$ ,  $\text{CHCl}_3$ ).

**(S)-2-(2-Aminophenyl)-4-tert-butylloxazoline 1d**

White solid, yield 90%; m.p. 67–68 °C.  $[\alpha]_{\text{D}}^{25} = +34.8$  ( $c = 0.50$ ,  $\text{CH}_2\text{Cl}_2$ );  $^1\text{H}$  NMR (300 MHz,  $\text{CDCl}_3$ ):  $\delta = 7.67$  (d,  $J = 7.8$  Hz, 1H), 7.24–7.16 (m, 1H), 6.70–6.62 (m, 2H), 6.15 (br s, 2H), 4.27–4.19 (m, 1H), 4.13–4.08 (m, 2H), 0.93 (s, 9H);  $^{13}\text{C}$  NMR (75 MHz,  $\text{CDCl}_3$ ):  $\delta = 163.4$ , 148.6, 131.8, 129.5, 115.9, 115.6, 109.1, 76.3, 66.8, 33.8, 25.8. lit.<sup>1</sup> m.p. 66–67 °C.  $[\alpha]_{\text{D}} = +35$  ( $c = 1.0$ , EtOH).

**Table S1** Validation of the reproducibility and optimization of reaction temperature.<sup>a</sup>

| Entry | T(°C) | Additive                        | Time (h) | Yield (%) <sup>b</sup> | ee (%) <sup>c</sup> |
|-------|-------|---------------------------------|----------|------------------------|---------------------|
| 1     | r.t.  | none                            | 24       | 90                     | 69                  |
| 2     | r.t.  | 10 mol% Et <sub>3</sub> N       | 12       | 99                     | 20                  |
| 3     | r.t.  | 10 mol% NaOH                    | 12       | 94                     | 6                   |
| 4     | r.t.  | 100 mg 4 Å MS                   | 20       | 98                     | 56                  |
| 5     | r.t.  | Na <sub>2</sub> SO <sub>4</sub> | 24       | 81                     | 70                  |
| 6     | 50    | none                            | 7        | 95                     | 63                  |
| 7     | 10    | none                            | 72       | 94                     | 71                  |
| 8     | 0     | none                            | 168      | 95                     | 78                  |

<sup>a</sup> Reactions were performed with 0.5 mmol of 4-nitrobenzaldehyde and 5.0 mmol of nitromethane in 2 mL of EtOH in the presence of 10 mol % catalyst **4db** at room temperature. <sup>b</sup> Isolated yields after column chromatography purification. <sup>c</sup> Determined by HPLC using a Daicel Chiralcel OD-H column (*n*-hexane–isopropanol 80:20 *V/V*, 1.0 mL/min, 254 nm).

**Table S2** Optimization of solvents and catalyst loading.<sup>a</sup>

| Entry           | Solvent                            | Yield (%) <sup>b</sup> | ee (%) <sup>c</sup> |
|-----------------|------------------------------------|------------------------|---------------------|
| 1               | EtOH                               | 90                     | 69                  |
| 2               | 95% EtOH                           | 95                     | 66                  |
| 3               | CF <sub>3</sub> CH <sub>2</sub> OH | trace                  | nd                  |
| 4               | MeOH                               | 79                     | 64                  |
| 5               | <i>i</i> -PrOH                     | 87                     | 67                  |
| 6               | THF                                | 96                     | 74                  |
| 7               | dioxane                            | trace                  | nd                  |
| 8               | TBME                               | 93                     | 76                  |
| 9               | toluene                            | 34                     | 80                  |
| 10 <sup>d</sup> | toluene                            | 39                     | 77                  |
| 11              | benzene                            | 32                     | 77                  |
| 12              | CH <sub>2</sub> Cl <sub>2</sub>    | 38                     | 76                  |
| 13              | Et <sub>2</sub> O                  | 96                     | 82                  |
| 14 <sup>e</sup> | Et <sub>2</sub> O                  | 90                     | 74                  |
| 15 <sup>f</sup> | Et <sub>2</sub> O                  | 61                     | 70                  |

<sup>a</sup> Reactions were performed with 0.5 mmol of 4-nitrobenzaldehyde and 5.0 mmol of nitromethane in 2 mL of solvent in the presence of 10 mol % catalyst **4db** at room temperature for 24 h. <sup>b</sup> Isolated yields after column chromatography purification. <sup>c</sup> Determined by HPLC using a Daicel Chiralcel OD-H column (*n*-hexane–isopropanol 80:20 *V/V*, 1.0 mL/min, 254 nm). <sup>d</sup> Catalyst **4db** was formed in EtOH, while the Henry reaction was carried out in toluene. <sup>e</sup> 5 mol % catalyst loading was employed. <sup>f</sup> 2.5 mol % catalyst loading was employed.

### General procedure for asymmetric Henry reaction catalyzed by *in situ* three-component generated complex catalyst

A solution of 2-(2-aminophenyl)oxazoline **1d** (10.9 mg, 0.05 mmol), 5-nitrosalicylaldehyde **2b** (8.4 mg, 0.05 mmol), and diethyl ether (2 mL) was stirred for 30 min at room temperature. Anhydrous Cu(OAc)<sub>2</sub> (9.1 mg, 0.05 mmol) was added and stirred for another 30 min, and the reaction mixture turned dark green. Aldehyde (0.5 mmol) and nitromethane (5.0 mmol, 0.26 mL) were added and stirred for 24–96 h at room temperature. The reaction mixture was concentrated and purified by silica gel column chromatography using petroleum ether-ethyl acetate 5:1 as eluent.

#### (*S*)-1-(4-Nitrophenyl)-2-nitroethanol **7a**

Compound **7a** was prepared according to the general procedure to give a colourless solid (97 mg, 92% yield); m.p. 84–85 °C. Enantiomeric excess was determined by HPLC with a Chiralcel OD-H column (*n*-hexane-isopropanol 80:20 *V/V*, 1.0 mL/min, 254 nm); minor enantiomer *t<sub>r</sub>* =

11.1 min, major enantiomer  $t_r = 13.3$  min; 82% ee;  $[\alpha]_D^{25} = +29.1$  ( $c = 0.75$ ,  $\text{CH}_2\text{Cl}_2$ ).  $^1\text{H}$  NMR (200 MHz,  $\text{CDCl}_3$ ):  $\delta = 8.28\text{--}8.23$  (m, 2H), 7.67–7.60 (m, 2H), 5.64–5.58 (m, 1H), 4.62–4.58 (m, 2H), 3.28 (d,  $J = 4.0$  Hz, 1H). lit.<sup>2</sup>  $[\alpha]_D^{25} = +29.4$  ( $c = 2.36$ ,  $\text{CH}_2\text{Cl}_2$ ).

#### **(S)-1-(3-Nitrophenyl)-2-nitroethanol 7b**

Compound **7b** was prepared according to the general procedure to give a colourless solid (101 mg, 95% yield); m.p. 70–71 °C. Enantiomeric excess was determined by HPLC with a Chiralcel OD-H column (*n*-hexane-isopropanol 85:15 *V/V*, 1.0 mL/min, 254 nm); minor enantiomer  $t_r = 14.5$  min, major enantiomer  $t_r = 16.2$  min; 76% ee;  $[\alpha]_D^{25} = +34.1$  ( $c = 1.12$ ,  $\text{CH}_2\text{Cl}_2$ ).  $^1\text{H}$  NMR (200 MHz,  $\text{CDCl}_3$ ):  $\delta = 8.34\text{--}8.32$  (m, 1H), 8.25–8.21 (m, 1H), 7.82–7.79 (m, 1H), 7.62 (t,  $J = 7.8$  Hz, 1H), 5.64–5.58 (m, 1H), 4.71–4.61 (m, 2H), 3.25 (d,  $J = 4.0$  Hz, 1H). lit.<sup>3</sup>  $[\alpha]_D^{25} = +32.6$  ( $c = 0.13$ ,  $\text{CH}_2\text{Cl}_2$ ).

#### **(S)-1-(2-Nitrophenyl)-2-nitroethanol 7c**

Compound **7c** was prepared according to the general procedure to give a brown solid (103 mg, 97% yield); m.p. 80–82 °C. Enantiomeric excess was determined by HPLC with a Chiralcel OD-H column (*n*-hexane-isopropanol 85:15 *V/V*, 1.0 mL/min, 254 nm); minor enantiomer  $t_r = 9.5$  min, major enantiomer  $t_r = 10.3$  min; 84% ee;  $[\alpha]_D^{25} = -158.8$  ( $c = 0.17$ ,  $\text{CH}_2\text{Cl}_2$ ).  $^1\text{H}$  NMR (200 MHz,  $\text{CDCl}_3$ ):  $\delta = 8.08$  (dd,  $J = 8.4$  Hz,  $J = 1.4$  Hz, 1H), 7.96 (dd,  $J = 7.8$  Hz,  $J = 1.4$  Hz, 1H), 7.80–7.72 (m, 1H), 7.60–7.52 (m, 1H), 6.09–6.03 (m, 1H), 4.88 (dd,  $J = 13.6$  Hz,  $J = 2.4$  Hz, 1H), 4.55 (dd,  $J = 13.8$  Hz,  $J = 9.0$  Hz, 1H), 3.28 (d,  $J = 4.0$  Hz, 1H). lit.<sup>3</sup>  $[\alpha]_D^{25} = -185$  ( $c = 0.19$ ,  $\text{CH}_2\text{Cl}_2$ ).

#### **(S)-1-(4-Chlorophenyl)-2-nitroethanol 7d**

Compound **7d** was prepared according to the general procedure to give a yellow oil (87 mg, 86% yield); Enantiomeric excess was determined by HPLC with a Chiralcel OD-H column (*n*-hexane-isopropanol 80:20 *V/V*, 1.0 mL/min, 210nm); minor enantiomer  $t_r = 7.1$  min, major enantiomer  $t_r = 8.5$  min; 87% ee;  $[\alpha]_D^{25} = +29.3$  ( $c = 0.71$ ,  $\text{CH}_2\text{Cl}_2$ ).  $^1\text{H}$  NMR (200 MHz,  $\text{CDCl}_3$ ):  $\delta = 7.42\text{--}7.32$  (m, 4H), 5.45 (d,  $J = 8.8$  Hz, 1H), 4.64–4.44 (m, 2H), 2.99 (br s, 1H). lit.<sup>3</sup>  $[\alpha]_D^{25} = +29.5$  ( $c = 0.11$ ,  $\text{CH}_2\text{Cl}_2$ ).

#### **(S)-1-(4-Bromophenyl)-2-nitroethanol 7e**

Compound **7e** was prepared according to the general procedure to give a yellow oil (99 mg, 81% yield). Enantiomeric excess was determined by HPLC with a Chiralcel OD-H column (*n*-hexane-isopropanol 80:20 *V/V*, 1.0 mL/min, 210nm); minor enantiomer  $t_r = 8.2$  min, major enantiomer  $t_r = 10.1$  min; 79% ee;  $[\alpha]_D^{25} = +26.0$  ( $c = 1.63$ ,  $\text{CH}_2\text{Cl}_2$ ).  $^1\text{H}$  NMR (200 MHz,  $\text{CDCl}_3$ ):  $\delta = 7.56\text{--}7.49$  (m, 2H), 7.28–7.23 (m, 2H), 5.44–5.36 (m, 1H), 4.61–4.43 (m, 2H), 3.04 (d,  $J = 3.6$  Hz, 1H). lit.<sup>4</sup>  $[\alpha]_D^{23} = +29.4$  ( $c = 0.67$ ,  $\text{CH}_2\text{Cl}_2$ ).

#### **(S)- 2-nitro-1-phenyl-ethanol 7f**

Compound **7f** was prepared according to the general procedure to give a colourless oil (71 mg, 85% yield). Enantiomeric excess was determined by HPLC with a Chiralcel OD-H column (*n*-hexane-isopropanol 80:20 *V/V*, 1.0 mL/min, 210nm); minor enantiomer  $t_r = 7.6$  min, major enantiomer  $t_r = 8.9$  min; 83% ee;  $[\alpha]_D^{25} = +36.8$  ( $c = 1.06$ ,  $\text{CH}_2\text{Cl}_2$ ).  $^1\text{H}$  NMR (200 MHz,  $\text{CDCl}_3$ ):  $\delta = 7.43\text{--}7.35$  (m, 5H), 5.51–5.43 (m, 1H), 4.62 (dd,  $J = 13.8$  Hz,  $J = 9.2$  Hz, 1H), 4.46 (dd,  $J = 13.2$  Hz,  $J = 5.4$  Hz, 1H), 2.84 (d,  $J = 4.0$  Hz, 1H). lit.<sup>2</sup>  $[\alpha]_D^{25} = +36.8$  ( $c = 4.04$ ,  $\text{CH}_2\text{Cl}_2$ ).

### **(S)-1-(4-Methoxyphenyl)-2-nitroethanol 7g**

Compound **7g** was prepared according to the general procedure to give a yellow oil (42 mg, 43% yield). Enantiomeric excess was determined by HPLC with a Chiralcel OD-H column (*n*-hexane-isopropanol 80:20 *V/V*, 1.0 mL/min, 210nm); minor enantiomer  $t_r = 9.7$  min, major enantiomer  $t_r = 11.6$  min; 75% ee;  $[\alpha]_D^{25} = +30.0$  ( $c = 0.32$ , CH<sub>2</sub>Cl<sub>2</sub>). <sup>1</sup>H NMR (200 MHz, CDCl<sub>3</sub>):  $\delta = 7.35\text{--}7.29$  (m, 2H), 6.96–6.90 (m, 2H), 5.41 (d,  $J = 9.4$  Hz, 1H), 4.61 (dd,  $J = 13.8$  Hz,  $J = 9.0$  Hz, 1H), 4.47 (dd,  $J = 13.8$  Hz,  $J = 3.2$  Hz, 1H), 3.82 (s, 3H), 2.76 (d,  $J = 2.2$  Hz, 1H). lit.<sup>5</sup>  $[\alpha]_D^{23} = +32.3$  ( $c = 1.05$ , CH<sub>2</sub>Cl<sub>2</sub>).

### **(S)-1-(4-Methylphenyl)-2-nitroethanol 7h**

Compound **7h** was prepared according to the general procedure to give a yellow oil (64 mg, 71% yield). Enantiomeric excess was determined by HPLC with a Chiralcel OD-H column (*n*-hexane-isopropanol 85:15 *V/V*, 1.0 mL/min, 210nm); minor enantiomer  $t_r = 9.4$  min, major enantiomer  $t_r = 11.5$  min; 80% ee;  $[\alpha]_D^{25} = +35.7$  ( $c = 0.51$ , CH<sub>2</sub>Cl<sub>2</sub>). <sup>1</sup>H NMR (200 MHz, CDCl<sub>3</sub>):  $\delta = 7.29\text{--}7.16$  (m, 4H), 5.41–5.35 (m, 1H), 4.58 (dd,  $J = 13.2$  Hz,  $J = 9.2$  Hz, 1H), 4.45 (dd,  $J = 13.2$  Hz,  $J = 3.4$  Hz, 1H), 2.89 (d,  $J = 3.6$  Hz, 1H), 2.35 (s, 3H). lit.<sup>6</sup>  $[\alpha]_D^{25} = +20.2$  ( $c = 0.85$ , CH<sub>2</sub>Cl<sub>2</sub>).

### **(S)-1-(1-Naphthyl)-2-nitroethanol 7i**

Compound **7i** was prepared according to the general procedure to give a yellow oil (70 mg, 65% yield); Enantiomeric excess was determined by HPLC with a Chiralcel OD-H column (*n*-hexane-isopropanol 80:20 *V/V*, 1.0 mL/min, 210nm); minor enantiomer  $t_r = 9.5$  min, major enantiomer  $t_r = 13.0$  min; 80% ee;  $[\alpha]_D^{25} = +29.1$  ( $c = 1.10$ , CH<sub>2</sub>Cl<sub>2</sub>). <sup>1</sup>H NMR (200 MHz, CDCl<sub>3</sub>):  $\delta = 8.04$  (d,  $J = 7.8$  Hz, 1H), 7.95–7.85 (m, 2H), 7.78 (d,  $J = 7.0$  Hz, 1H), 7.65–7.49 (m, 3H), 6.32–6.24 (m, 1H), 4.70–4.67 (m, 2H), 2.86 (d,  $J = 3.6$  Hz, 1H). lit.<sup>7</sup>  $[\alpha]_D^{25} = +24.1$  ( $c = 1.03$ , CH<sub>2</sub>Cl<sub>2</sub>).

### **(R)-Nitromethyl-2-furanmethanol 7j**

Compound **7j** was prepared according to the general procedure to give a yellow oil (44 mg, 56% yield). Enantiomeric excess was determined by HPLC with a Chiralcel IA column (*n*-hexane-isopropanol 95:5 *V/V*, 1.0 mL/min, 210nm); minor enantiomer  $t_r = 18.3$  min, major enantiomer  $t_r = 20.4$  min; 88% ee;  $[\alpha]_D^{25} = +34.3$  ( $c = 1.05$ , CH<sub>2</sub>Cl<sub>2</sub>). <sup>1</sup>H NMR (200 MHz, CDCl<sub>3</sub>):  $\delta = 7.43\text{--}7.42$  (m, 1H), 6.41–6.37 (m, 1H), 5.52–5.44 (m, 1H), 4.80 (dd,  $J = 13.6$  Hz,  $J = 8.8$  Hz, 1H), 4.67 (dd,  $J = 13.4$  Hz,  $J = 3.8$  Hz, 1H), 3.00 (br s, 1H). lit.<sup>4</sup>  $[\alpha]_D^{22} = +34.0$  ( $c = 0.3$ , CH<sub>2</sub>Cl<sub>2</sub>).

### **(2S, 3E)-1-Nitro-4-phenyl-3-buten-2-ol 7k**

Compound **7k** was prepared according to the general procedure to give a colourless solid (76 mg, 79% yield); m.p. 82–83 °C. Enantiomeric excess was determined by HPLC with a Chiralcel OD-H column (*n*-hexane-isopropanol 80:20 *V/V*, 1.0 mL/min, 254nm); major enantiomer  $t_r = 16.6$  min, minor enantiomer  $t_r = 18.4$  min; 75% ee;  $[\alpha]_D^{25} = +7.4$  ( $c = 2.48$ , CH<sub>2</sub>Cl<sub>2</sub>). <sup>1</sup>H NMR (200 MHz, CDCl<sub>3</sub>):  $\delta = 7.39\text{--}7.28$  (m, 5H), 6.76 (d,  $J = 16.2$  Hz, 1H), 6.12 (dd,  $J = 15.8$  Hz,  $J = 6.2$  Hz, 1H), 5.08–4.96 (m, 1H), 4.84 (d,  $J = 6.4$  Hz, 2H), 2.81 (d,  $J = 4.4$  Hz, 1H). lit.<sup>8</sup>  $[\alpha]_D^{22} = +11.8$  ( $c = 0.64$ , CH<sub>2</sub>Cl<sub>2</sub>).

### **(S)-1-Nitro-4-phenylbutan-2-ol 7l**

Compound **7l** was prepared according to the general procedure to give a yellow oil (67 mg, 69% yield); Enantiomeric excess was determined by HPLC with a Chiralcel IA column (*n*-hexane-isopropanol 90:10 *V/V*, 1.0 mL/min, 210nm); minor enantiomer  $t_r = 10.2$  min, major enantiomer  $t_r = 12.4$  min; 86% ee;  $[\alpha]_D^{25} = -16.7$  ( $c = 1.74$ ,  $\text{CH}_2\text{Cl}_2$ ).  $^1\text{H NMR}$  (200 MHz,  $\text{CDCl}_3$ ):  $\delta = 7.35\text{--}7.12$  (m, 5H), 4.39–4.24 (m, 3H), 2.89–2.68 (m, 3H), 1.87–1.74 (m, 2H). lit.<sup>8</sup>  $[\alpha]_D^{25} = -14.8$  ( $c = 0.97$ ,  $\text{CH}_2\text{Cl}_2$ ).

### (S)-1-Cyclohexyl-2-nitroethanol **7m**

Compound **7m** was prepared according to the general procedure to give a colourless oil (80 mg, 92% yield). Enantiomeric excess was determined by HPLC with a Chiralcel OF column (*n*-hexane-isopropanol 90:10 *V/V*, 0.4 mL/min, 210nm); minor enantiomer  $t_r = 36.5$  min, major enantiomer  $t_r = 39.6$  min; 82% ee;  $[\alpha]_D^{25} = +17.5$  ( $c = 1.28$ ,  $\text{CH}_2\text{Cl}_2$ ).  $^1\text{H NMR}$  (200 MHz,  $\text{CDCl}_3$ ):  $\delta = 4.60\text{--}4.37$  (m, 2H), 4.15–4.03 (m, 1H), 3.05 (d,  $J = 5.6$  Hz, 1H), 1.86–1.64 (m, 5H), 1.58–1.35 (m, 1H), 1.30–1.01 (m, 5H). lit.<sup>8</sup>  $[\alpha]_D^{25} = +16.9$  ( $c = 0.89$ ,  $\text{CH}_2\text{Cl}_2$ ).

### (S)-3-Methyl-1-nitro-2-butanol **7n**

Compound **7n** was prepared according to the general procedure to give a yellow oil (54 mg, 82% yield). Enantiomeric excess was determined by HPLC with a Chiralcel OF column (*n*-hexane-isopropanol 95:5 *V/V*, 0.8 mL/min, 210nm); minor enantiomer  $t_r = 26.7$  min, major enantiomer  $t_r = 29.0$  min; 87% ee;  $[\alpha]_D^{25} = +17.5$  ( $c = 1.28$ ,  $\text{CH}_2\text{Cl}_2$ ).  $^1\text{H NMR}$  (200 MHz,  $\text{CDCl}_3$ ):  $\delta = 4.58\text{--}4.36$  (m, 2H), 4.16–4.05 (m, 1H), 2.81 (d,  $J = 5.2$  Hz, 1H), 1.88–1.72 (m, 1H), 1.01 (d,  $J = 3.0$  Hz, 1H), 0.97 (d,  $J = 3.0$  Hz, 1H). lit.<sup>3</sup>  $[\alpha]_D^{25} = +13.9$  ( $c = 0.14$ ,  $\text{CHCl}_3$ ).

### (S)-3,3-Dimethyl-1-nitro-2-butanol **7o**

Compound **7o** was prepared according to the general procedure to give a colourless oil (60 mg, 81% yield). Enantiomeric excess was determined by HPLC with a Chiralcel OD-H column (*n*-hexane-isopropanol 95:5 *V/V*, 0.8 mL/min, 220nm); minor enantiomer  $t_r = 10.6$  min, major enantiomer  $t_r = 12.0$  min; 92% ee;  $[\alpha]_D^{25} = +16.8$  ( $c = 1.25$ ,  $\text{CH}_2\text{Cl}_2$ ).  $^1\text{H NMR}$  (200 MHz,  $\text{CDCl}_3$ ):  $\delta = 4.50$  (dd,  $J = 13.2$  Hz,  $J = 2.4$  Hz, 1H), 4.34 (dd,  $J = 12.8$  Hz,  $J = 10.0$  Hz, 1H), 4.04–3.96 (m, 1H), 2.47 (d,  $J = 4.8$  Hz, 1H), 0.95 (s, 9H). lit.<sup>9</sup>  $[\alpha]_D = +36.1$  ( $c = 0.6$ ,  $\text{CHCl}_3$ ).

### Reference:

- 1 H. A. McManus, P. J. Guiry, *J. Org. Chem.* **2002**, *67*, 8566–8573.
- 2 S. K. Ginoira, V. K. Singh, *Org. Biomol. Chem.* **2007**, *5*, 3932–3937.
- 3 Y. Xiong, F. Wang, X. Huang, Y. Wen, X. Feng, *Chem. Eur. J.* **2007**, *13*, 829–833;
- 4 R. Kowalczyk, P. Kwiatkowski, J. Skarzewski, J. Jurczak, *J. Org. Chem.* 2009, *74*(2), 753–756.
- 5 G. Blay, E. Climent, I. Fernández, J. R. Pedro, *Tetrahedron: Asymmetry* **2007**, *18*, 1603–1612.
- 6 J.-J. Jiang, M. Shi, *Tetrahedron: Asymmetry* **2007**, *18*, 1376–1382;
- 7 G. Lai, S. Wang, Z. Wang, *Tetrahedron: Asymmetry* **2008**, *19*, 1813–1819;
- 8 G. Blay, L. R. Domingo, V. Hernandez-Olmos, J. R. Pedro, *Chem. Eur. J.* **2008**, *14*, 4725–4730.
- 9 M. Bandini, F. Piccinelli, S. Tommasi, A. Umani-Ronchi, C. Ventrici, *Chem. Commun.* **2007**, 616–618.



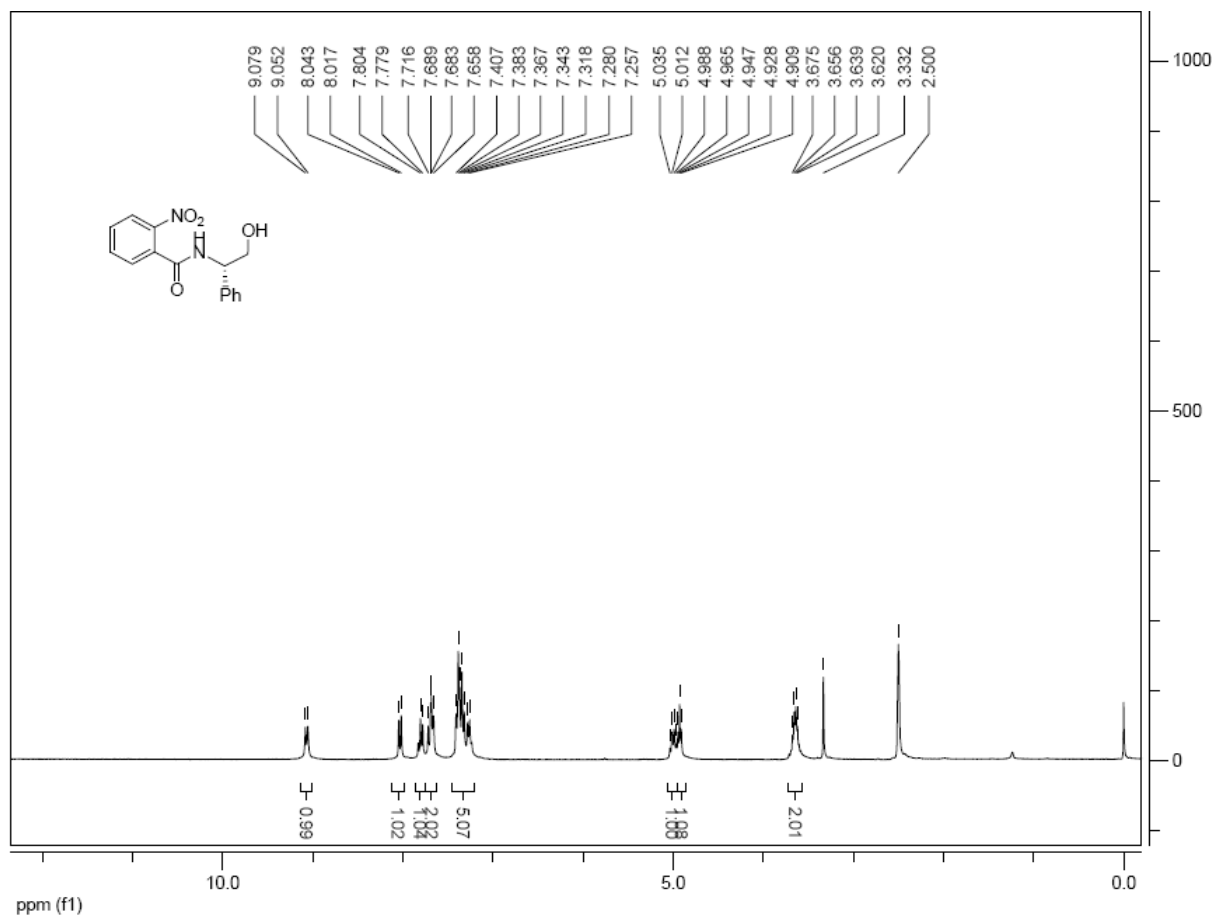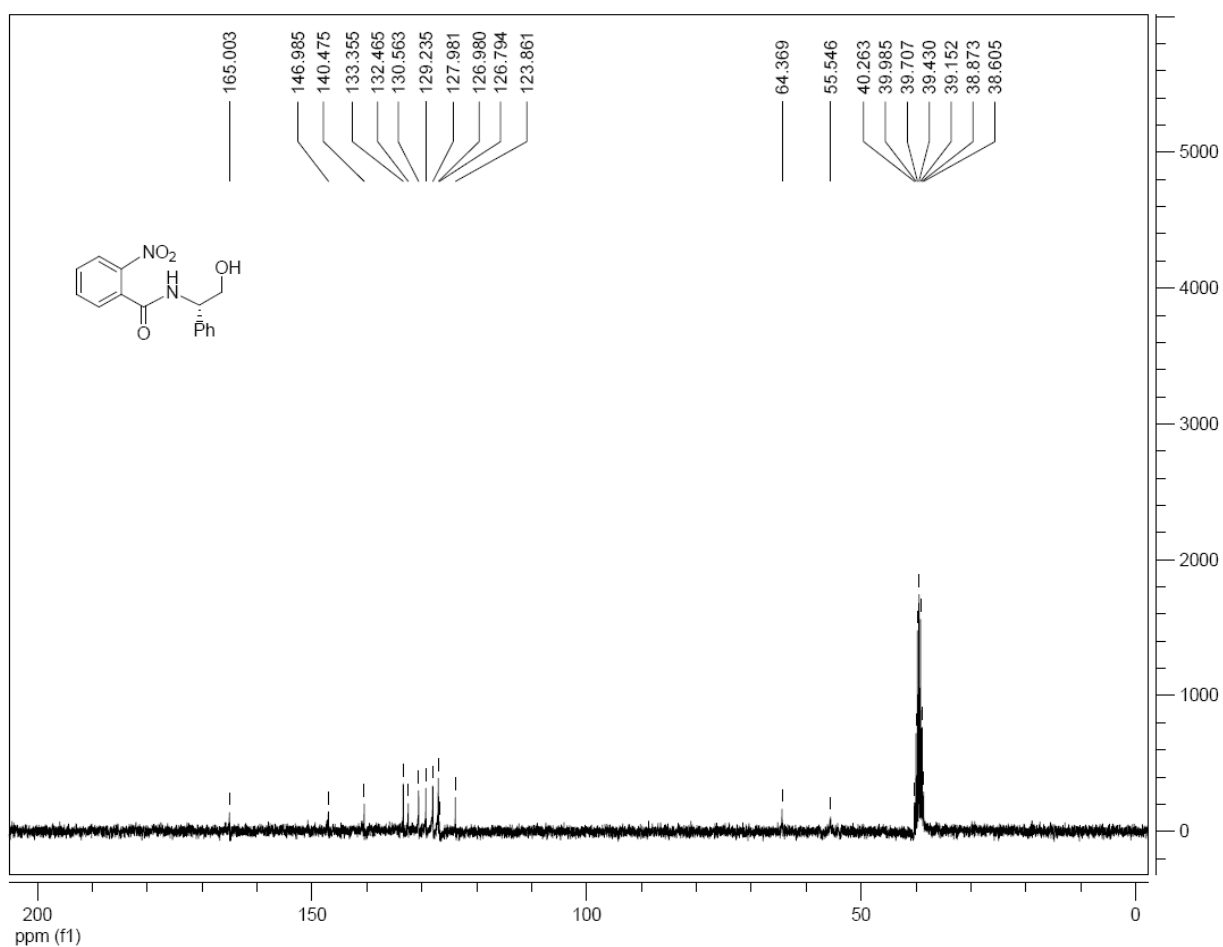

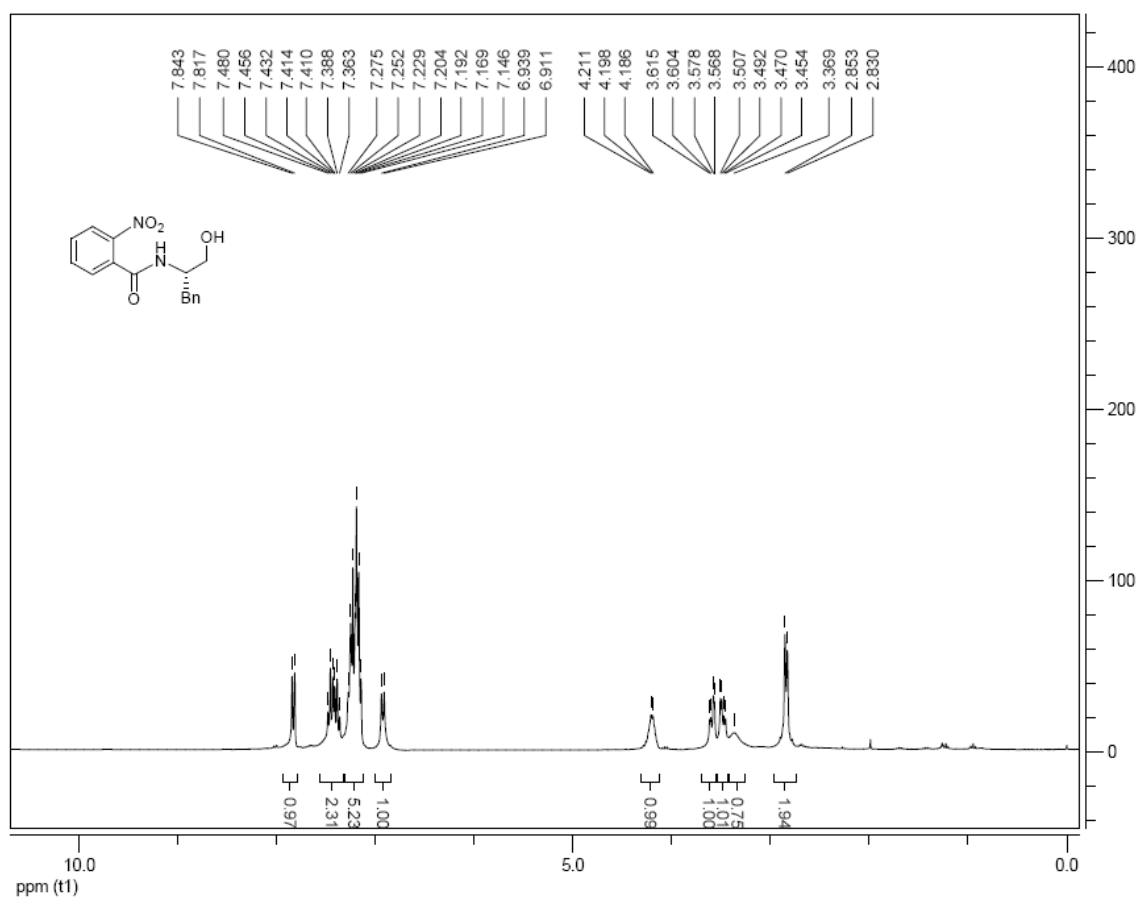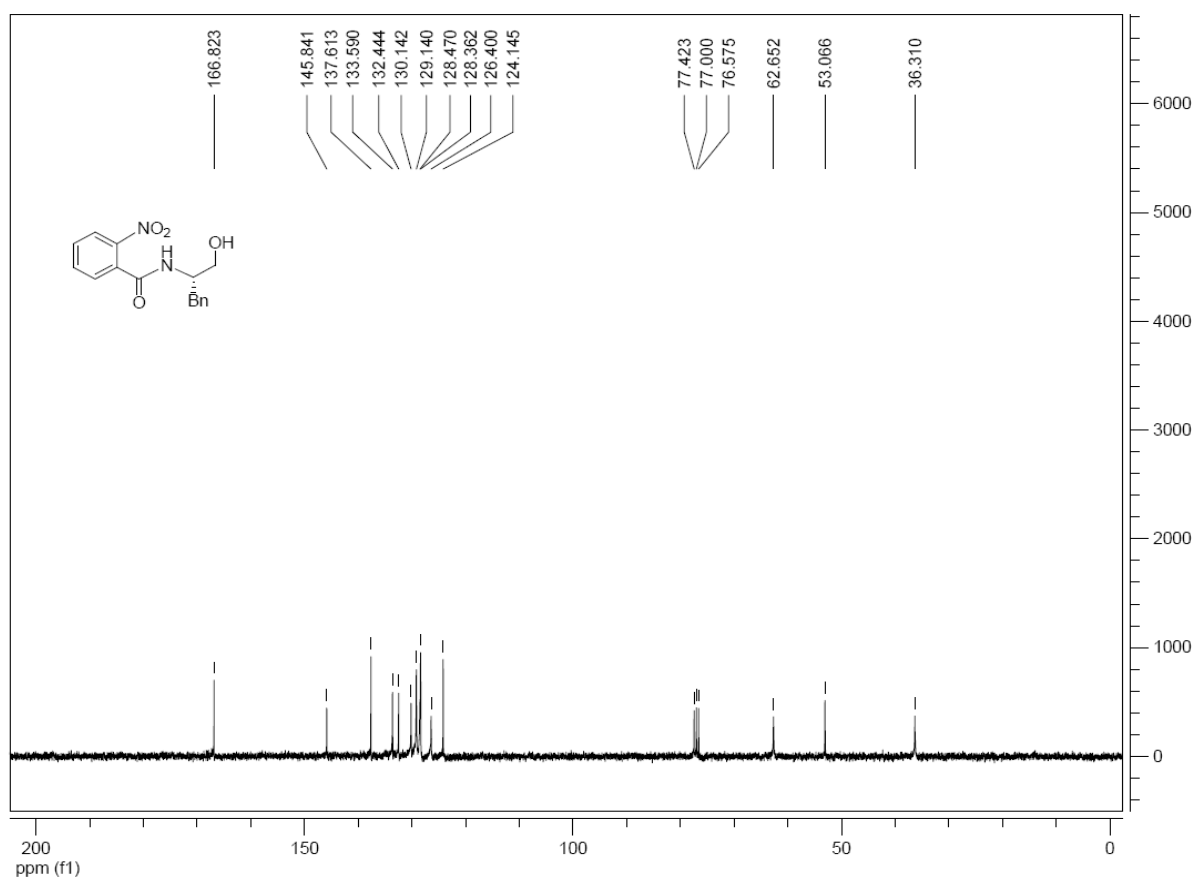

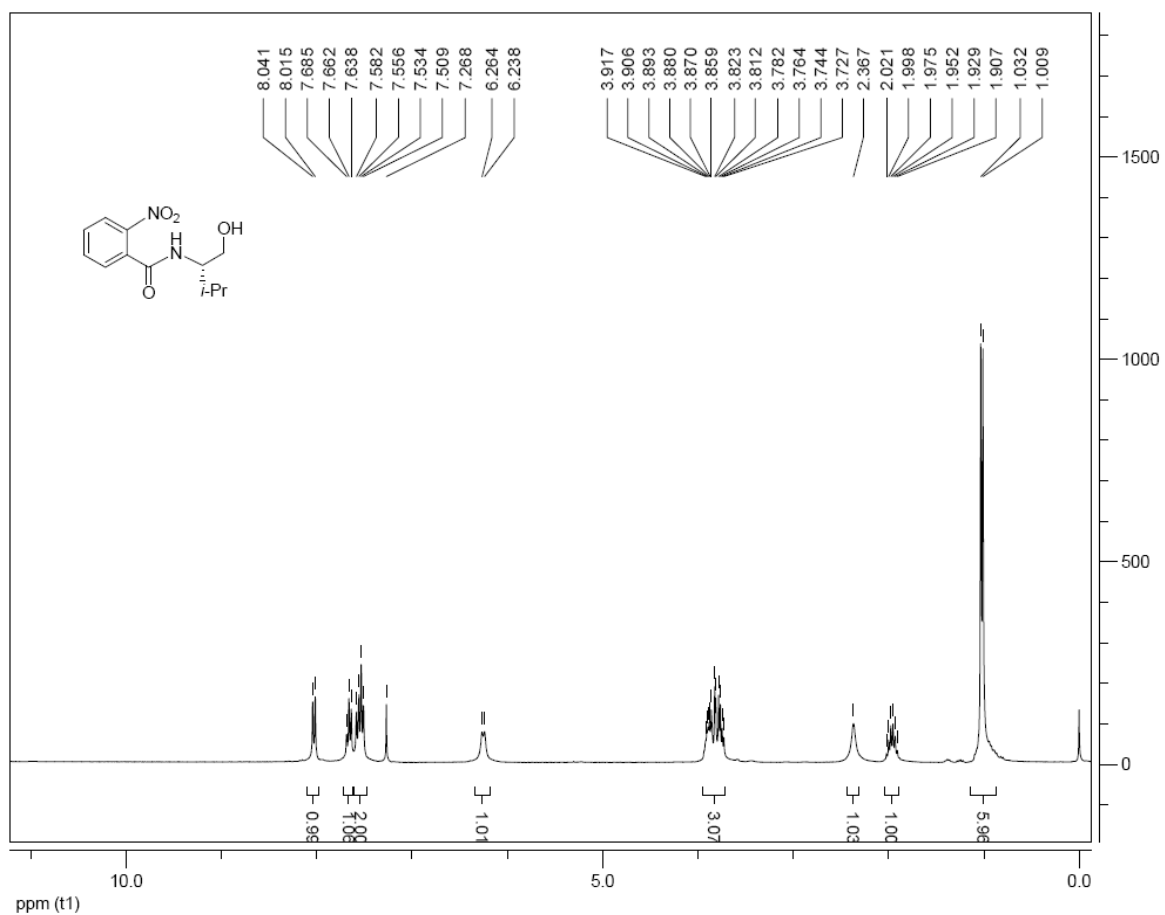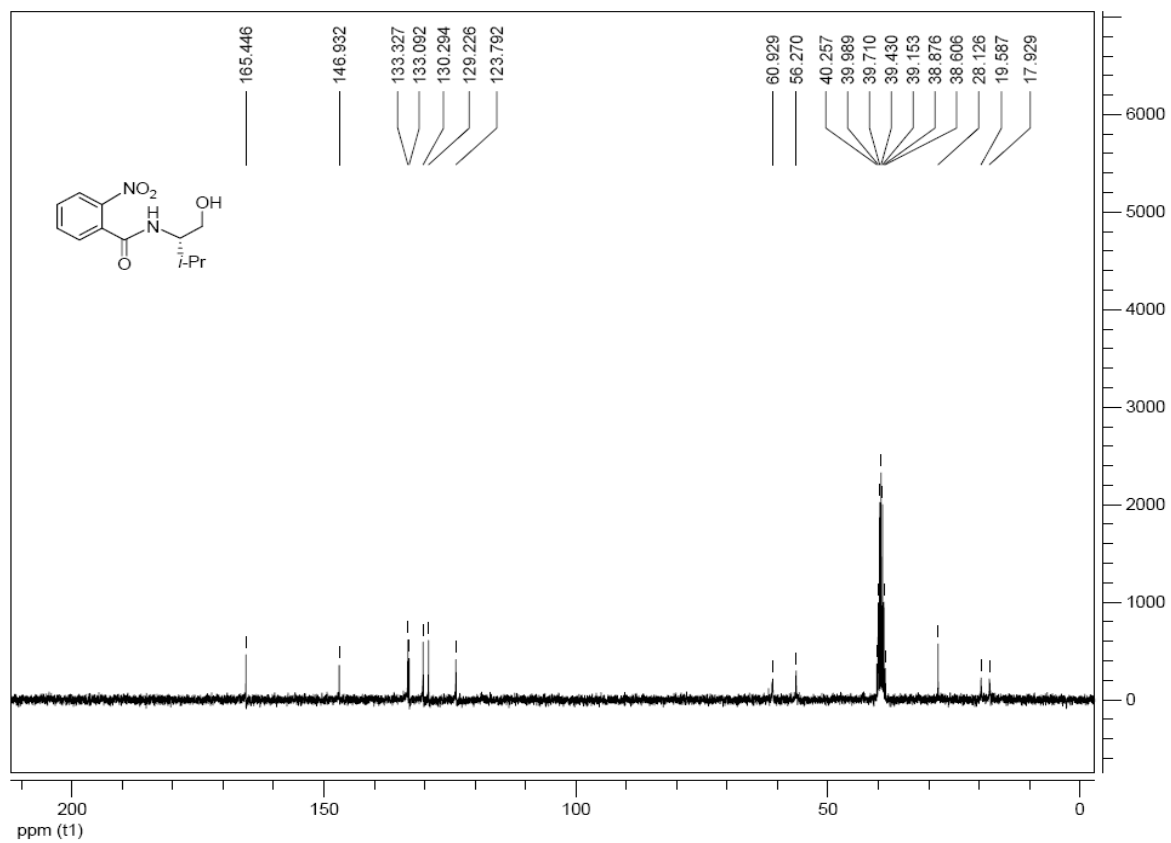

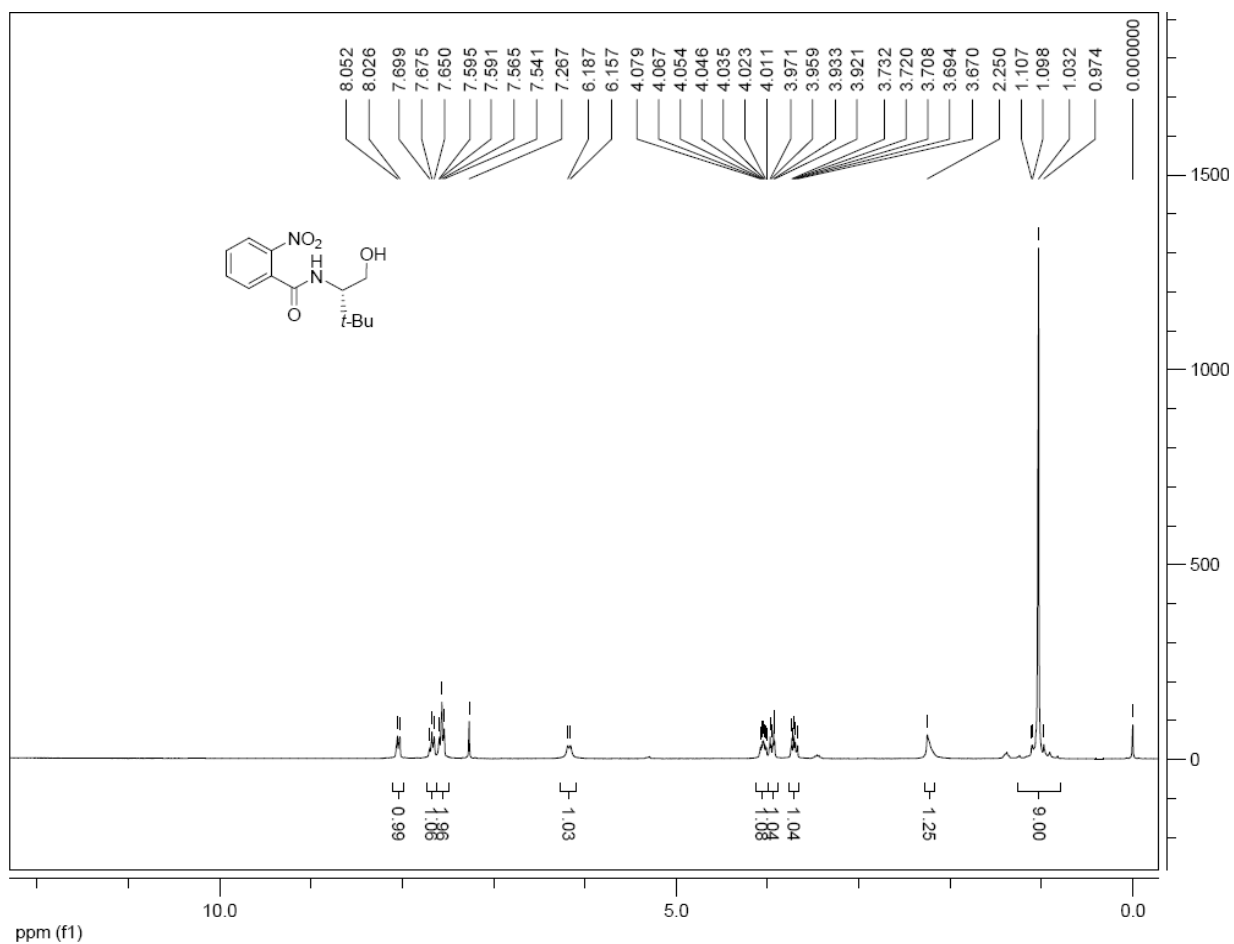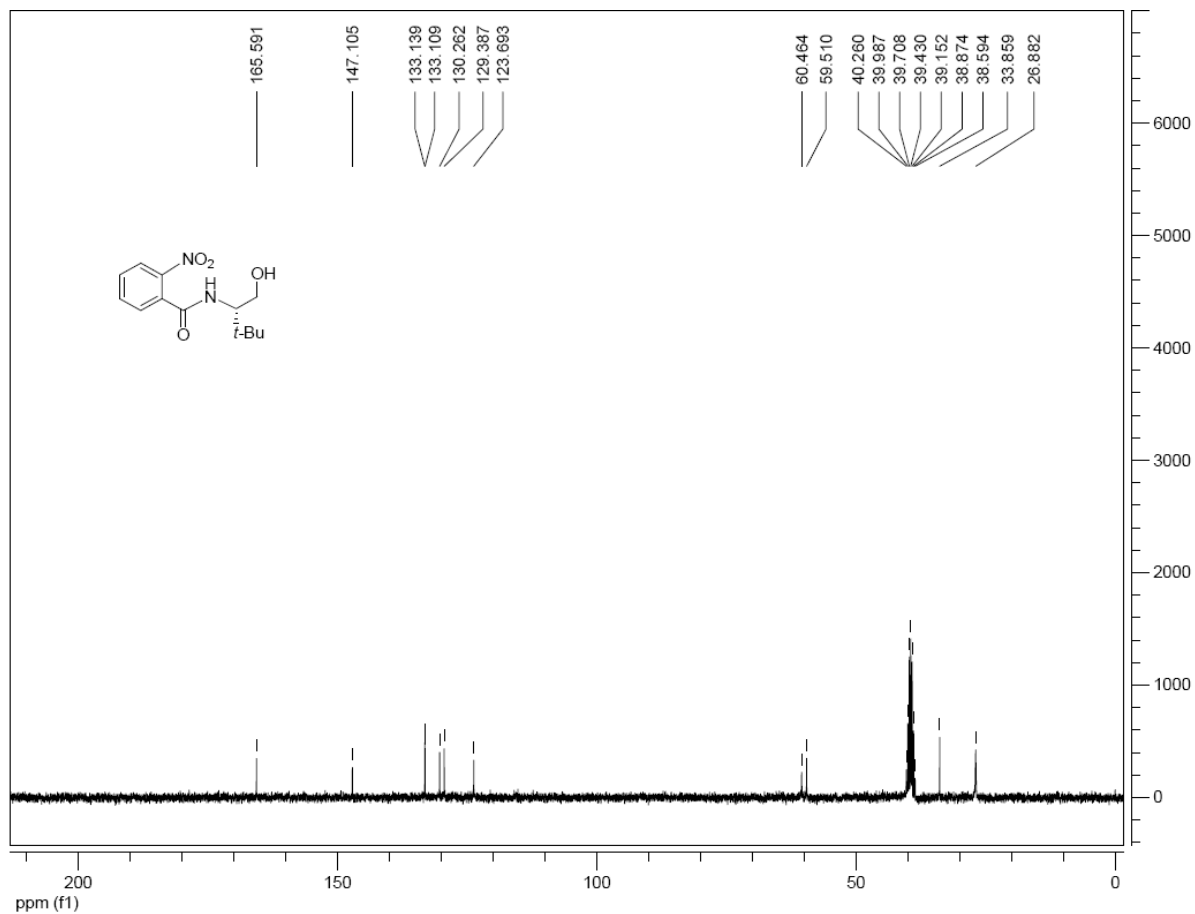

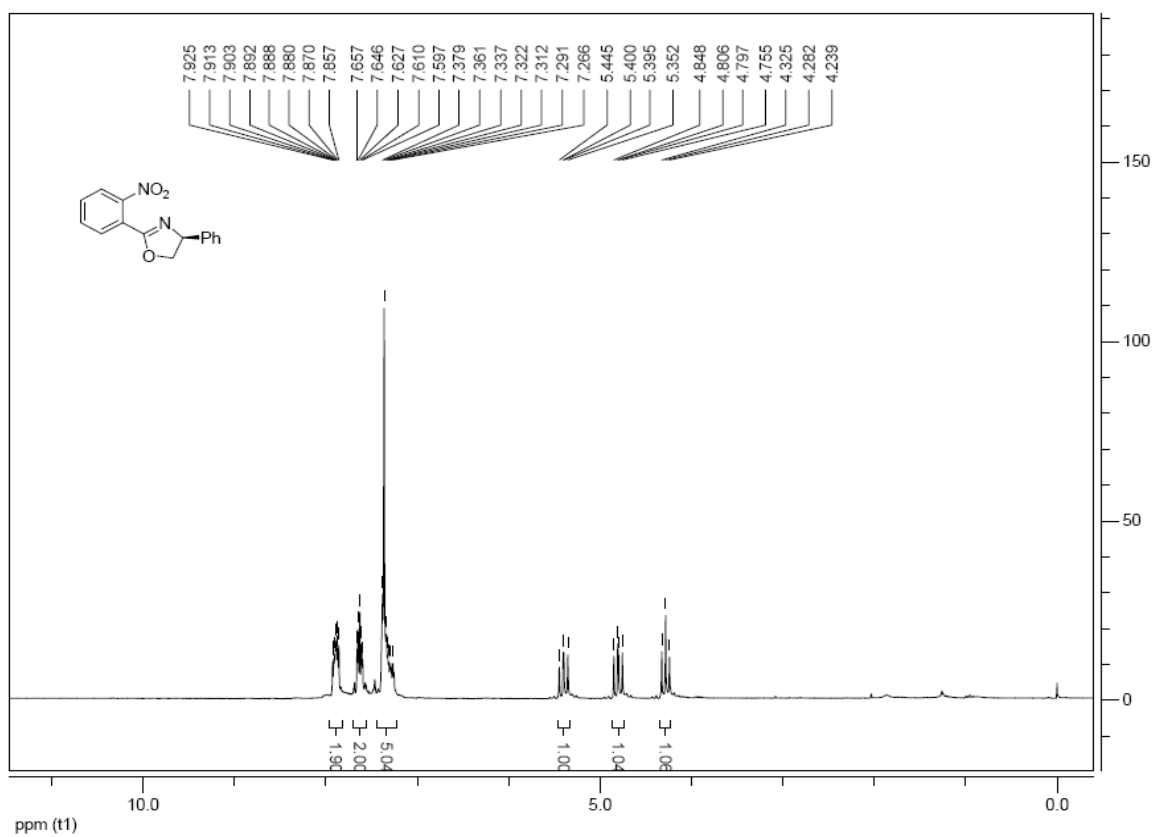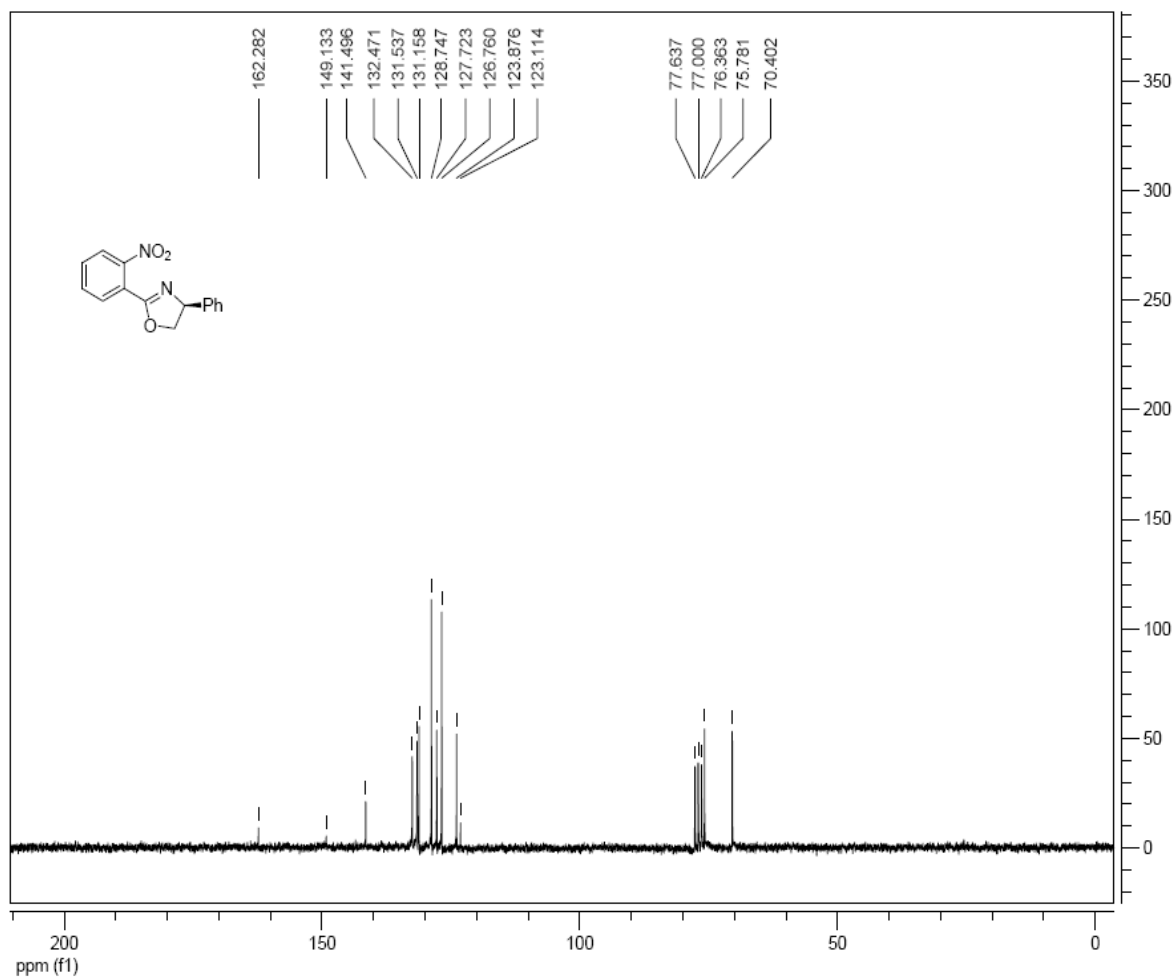

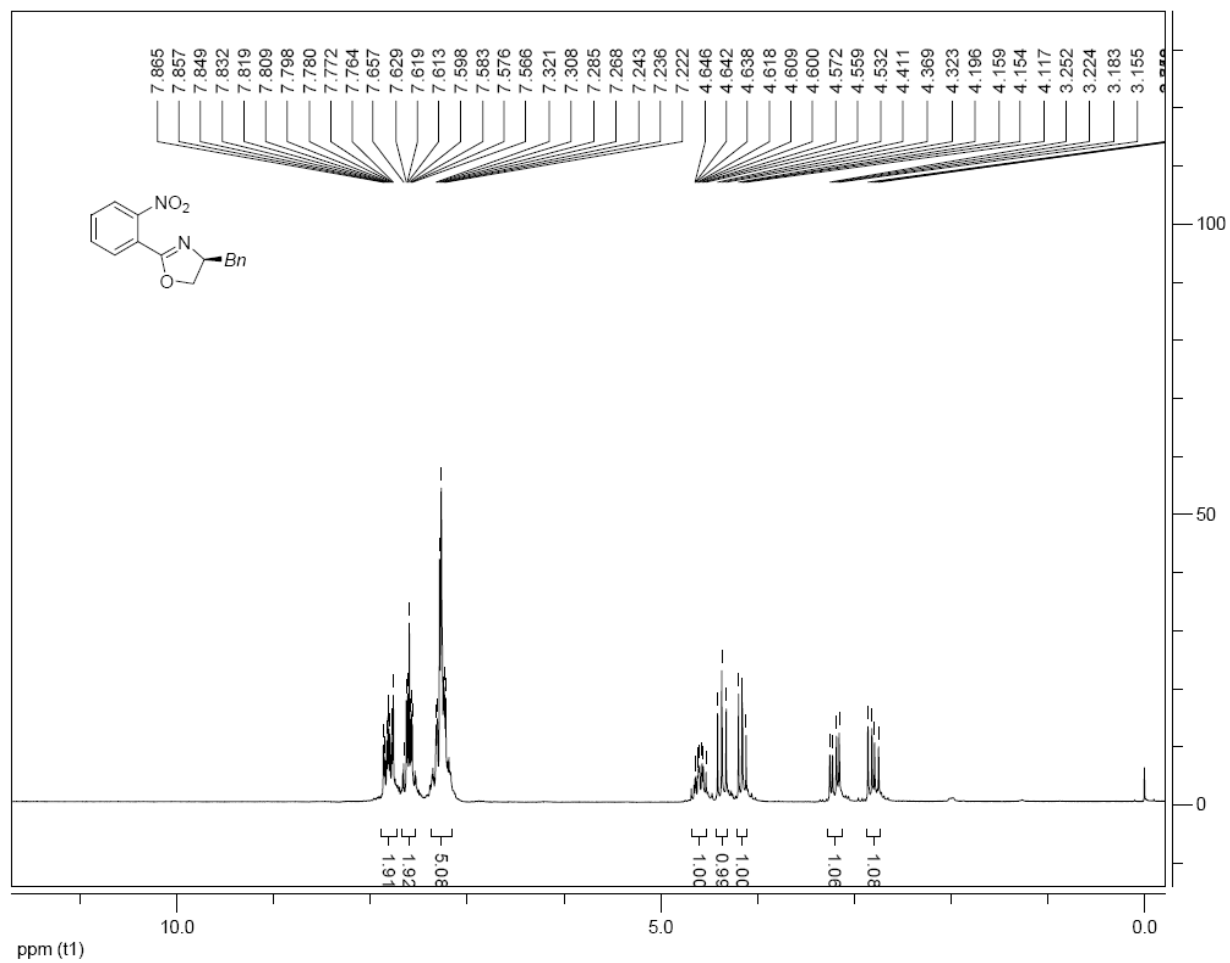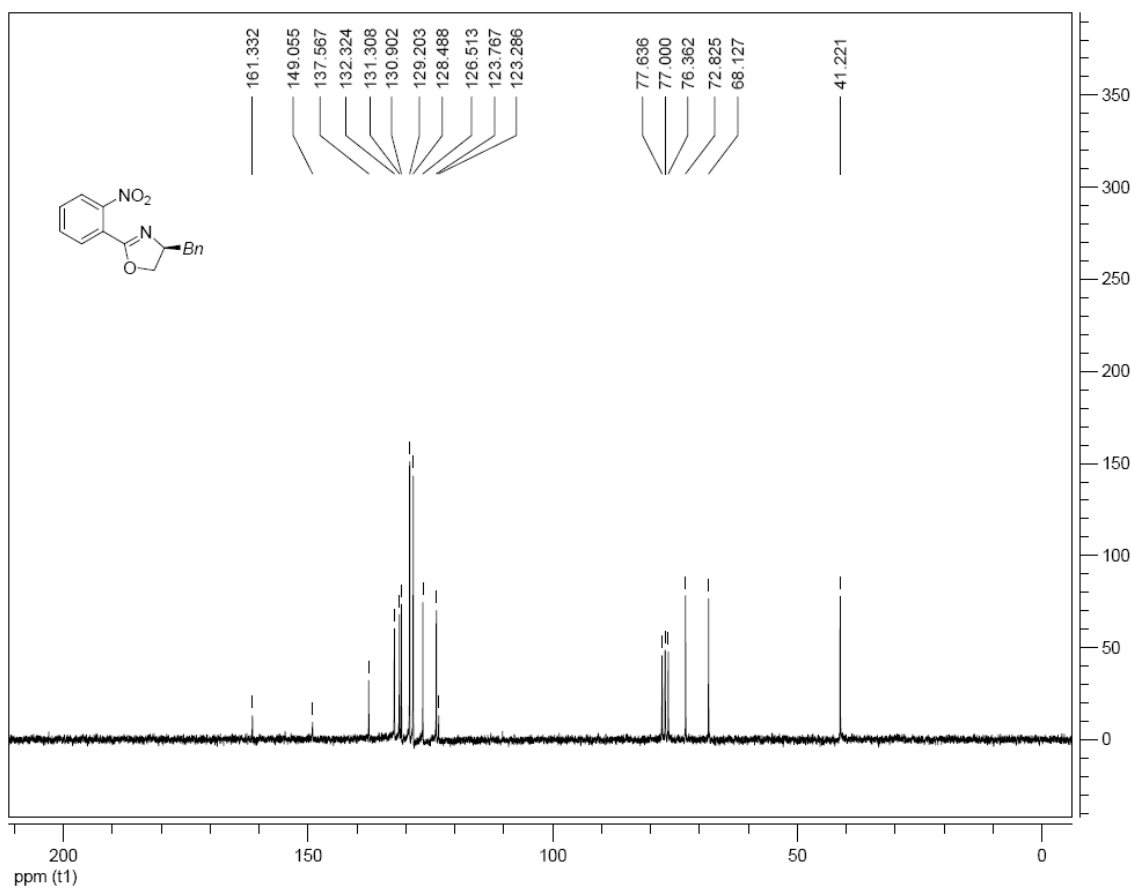

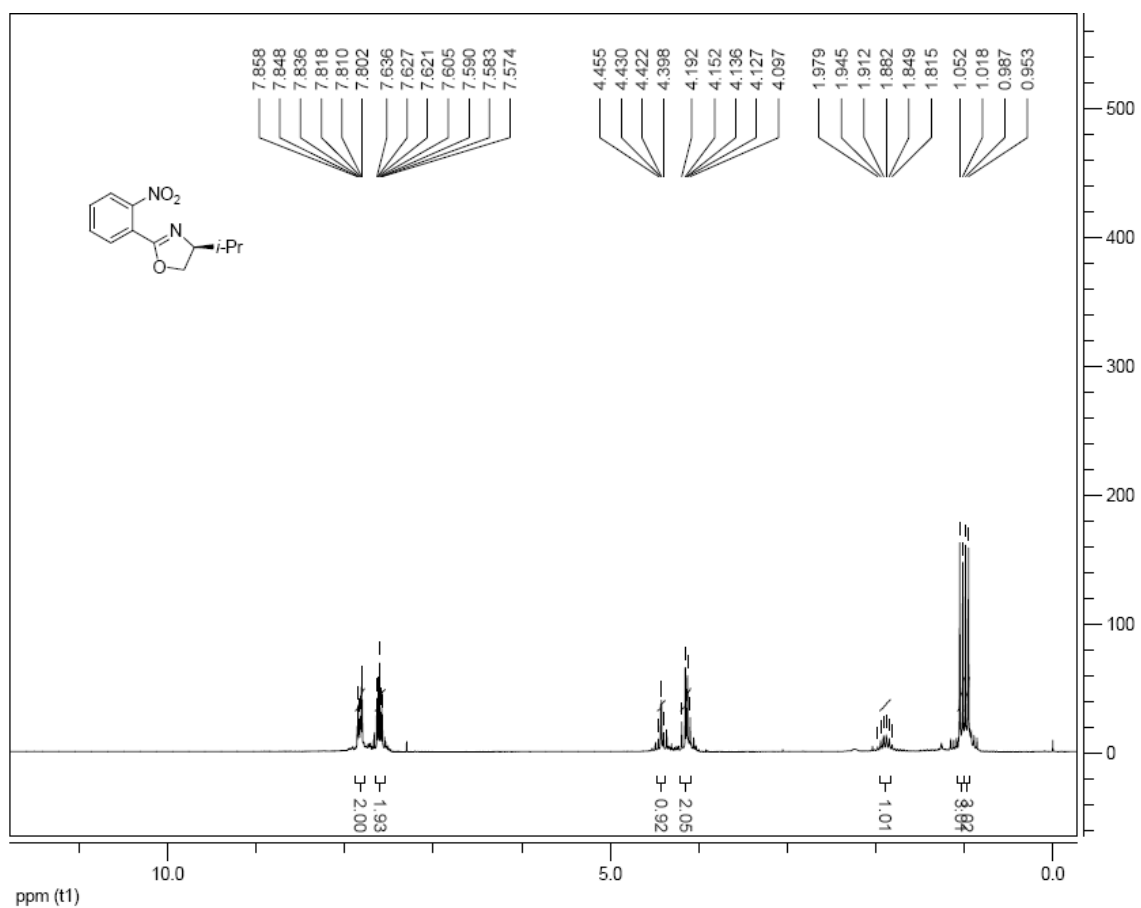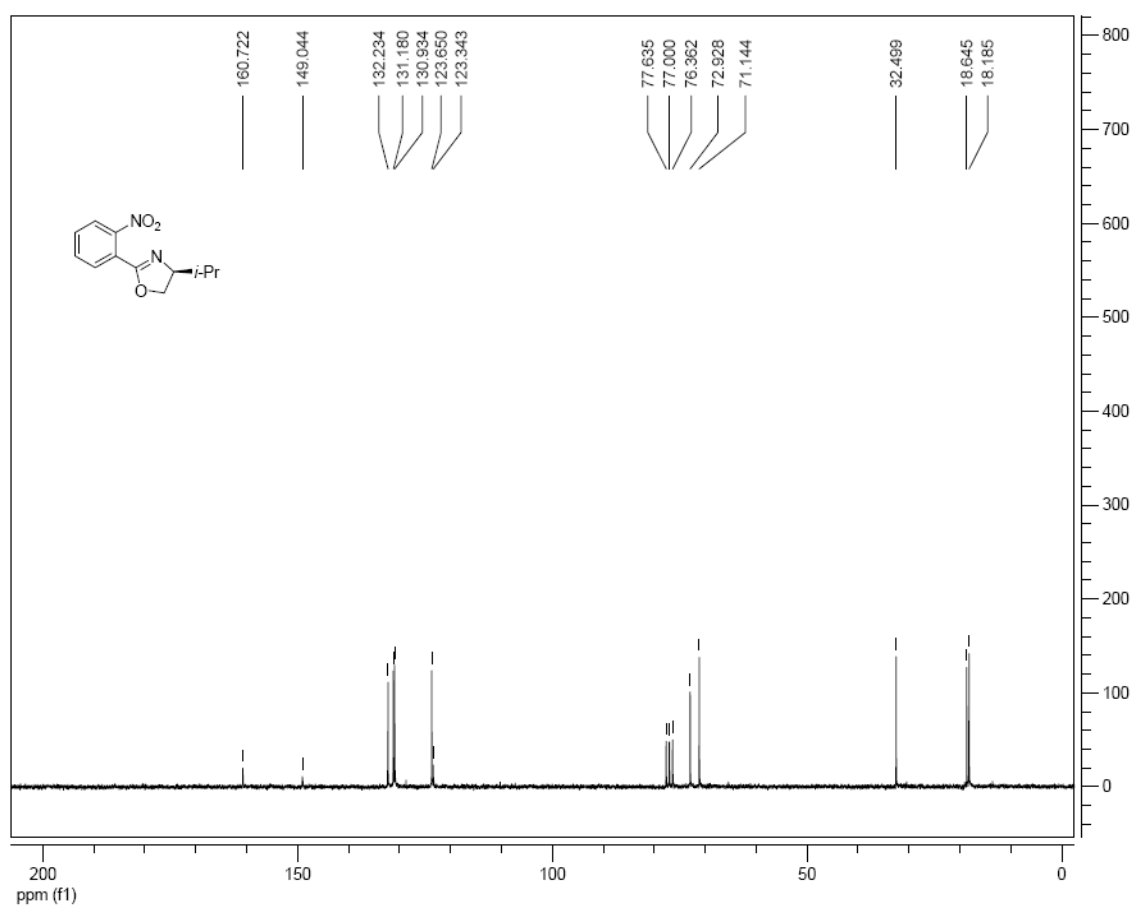

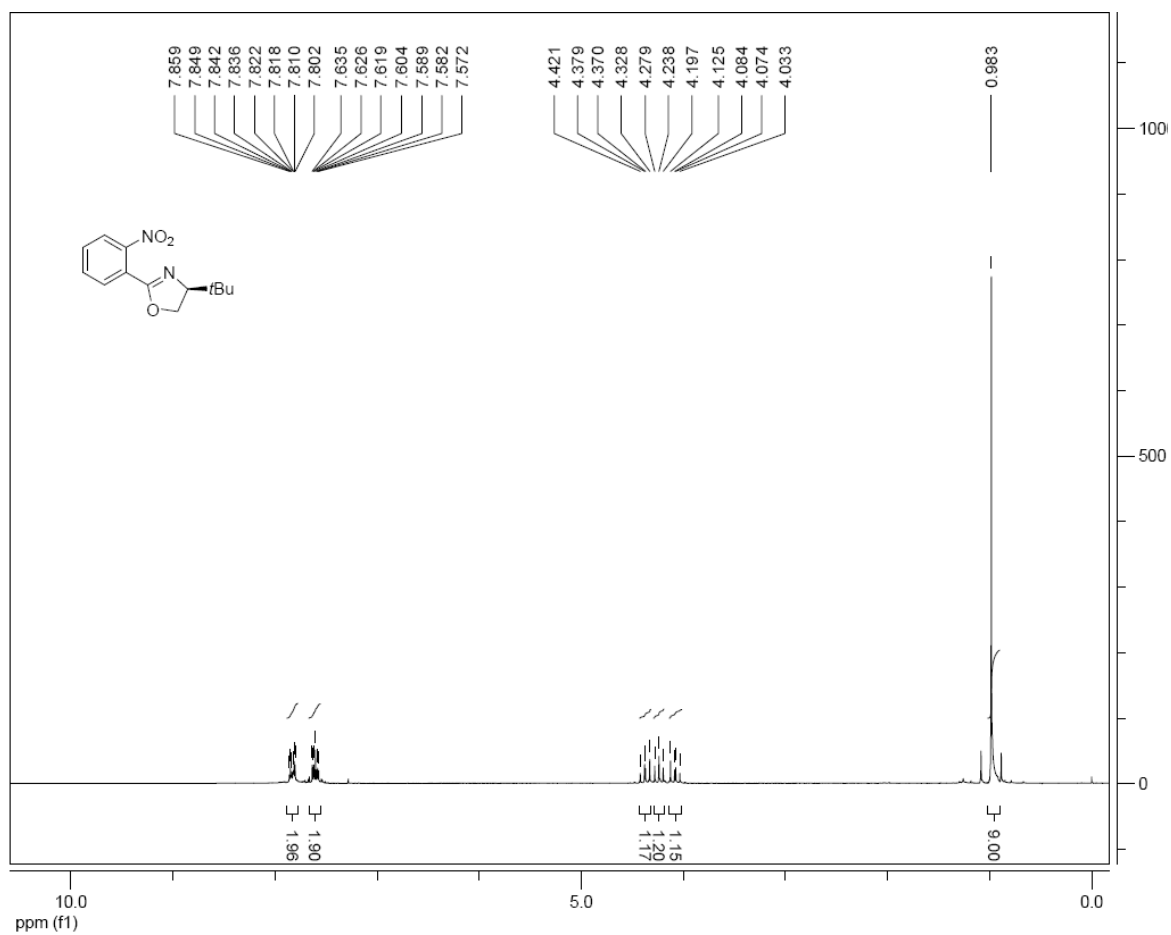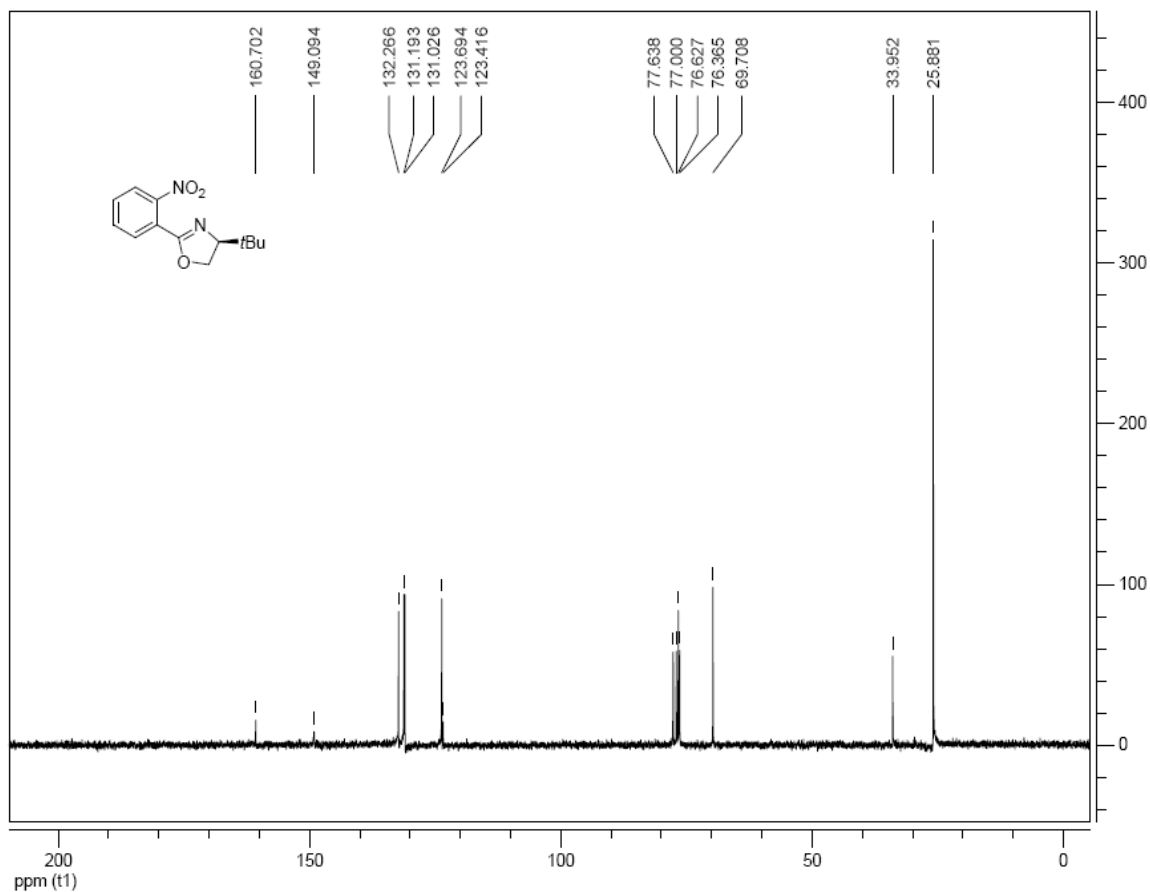



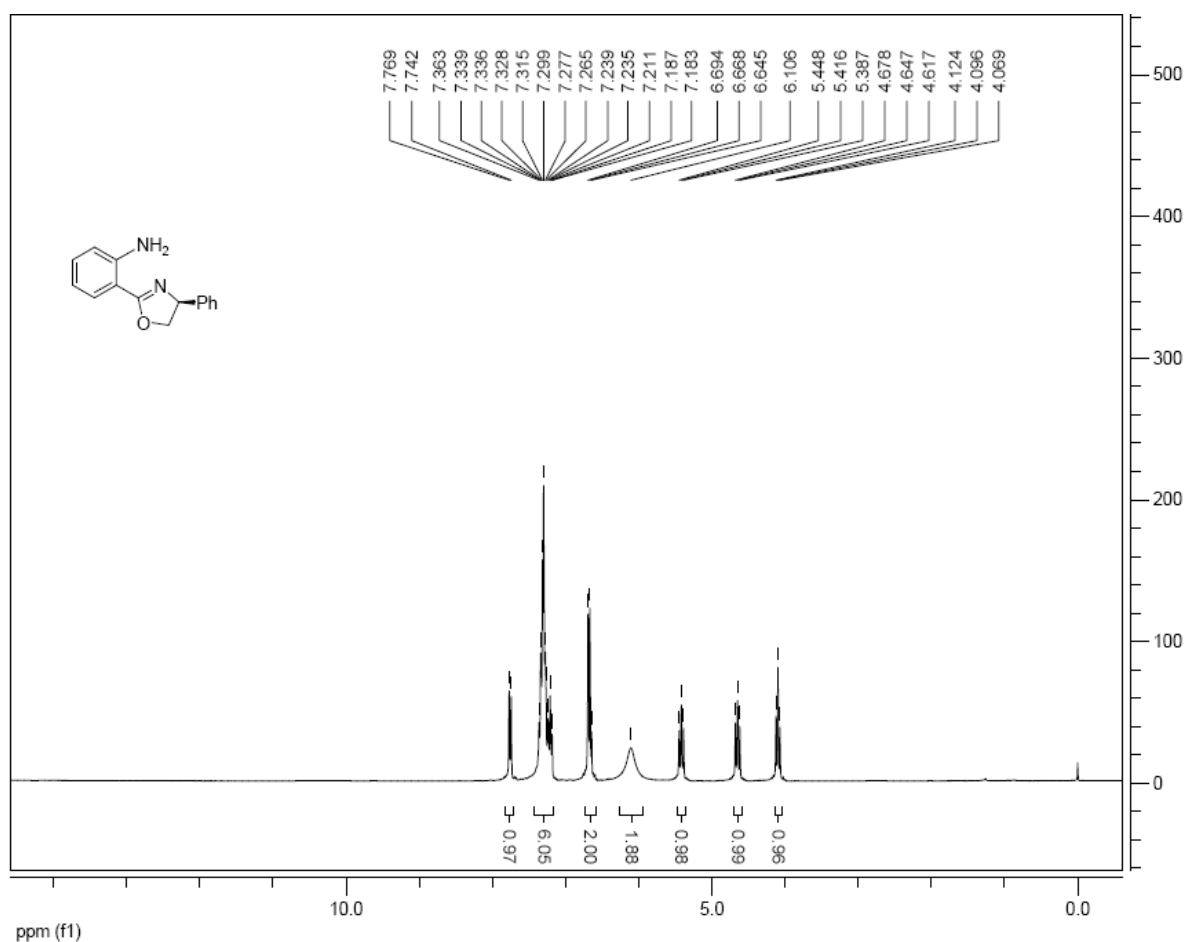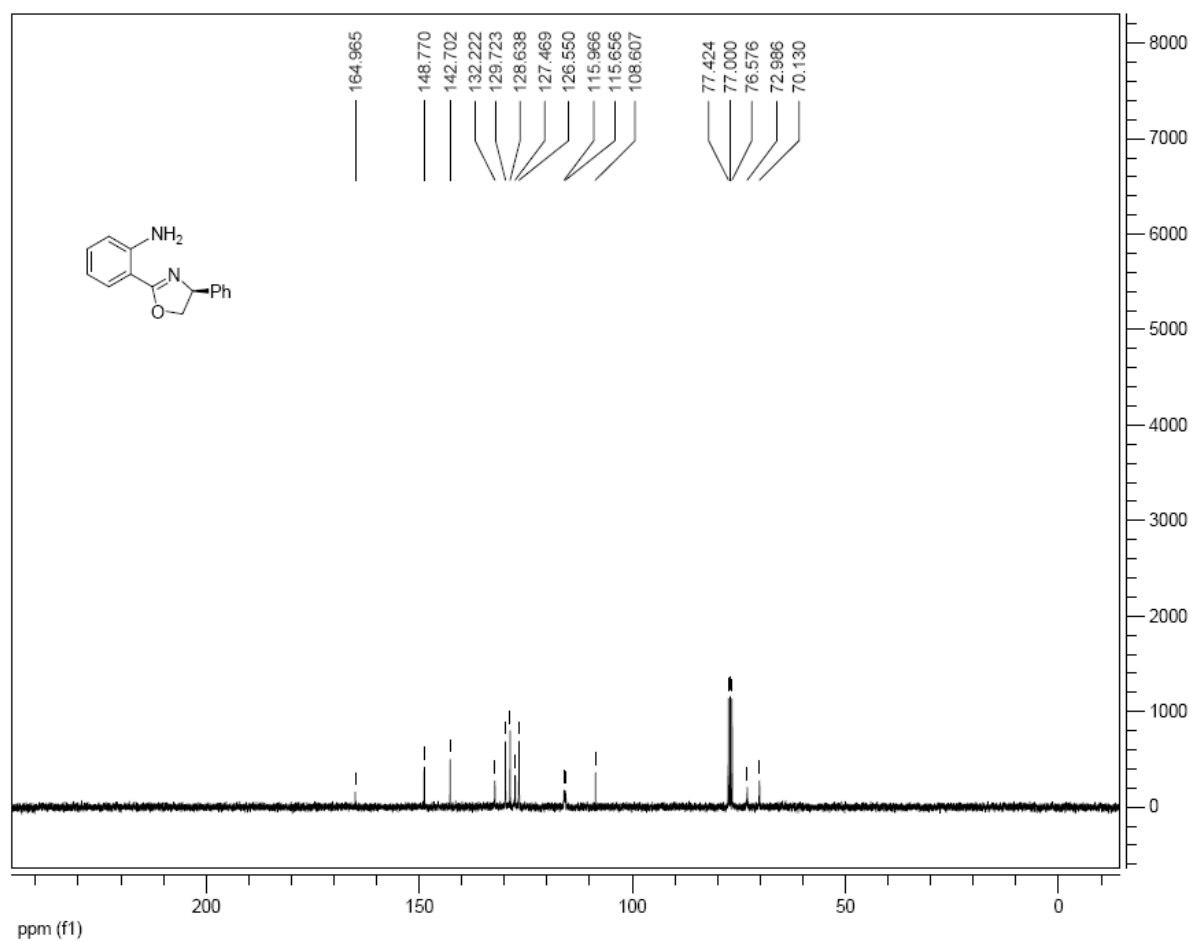

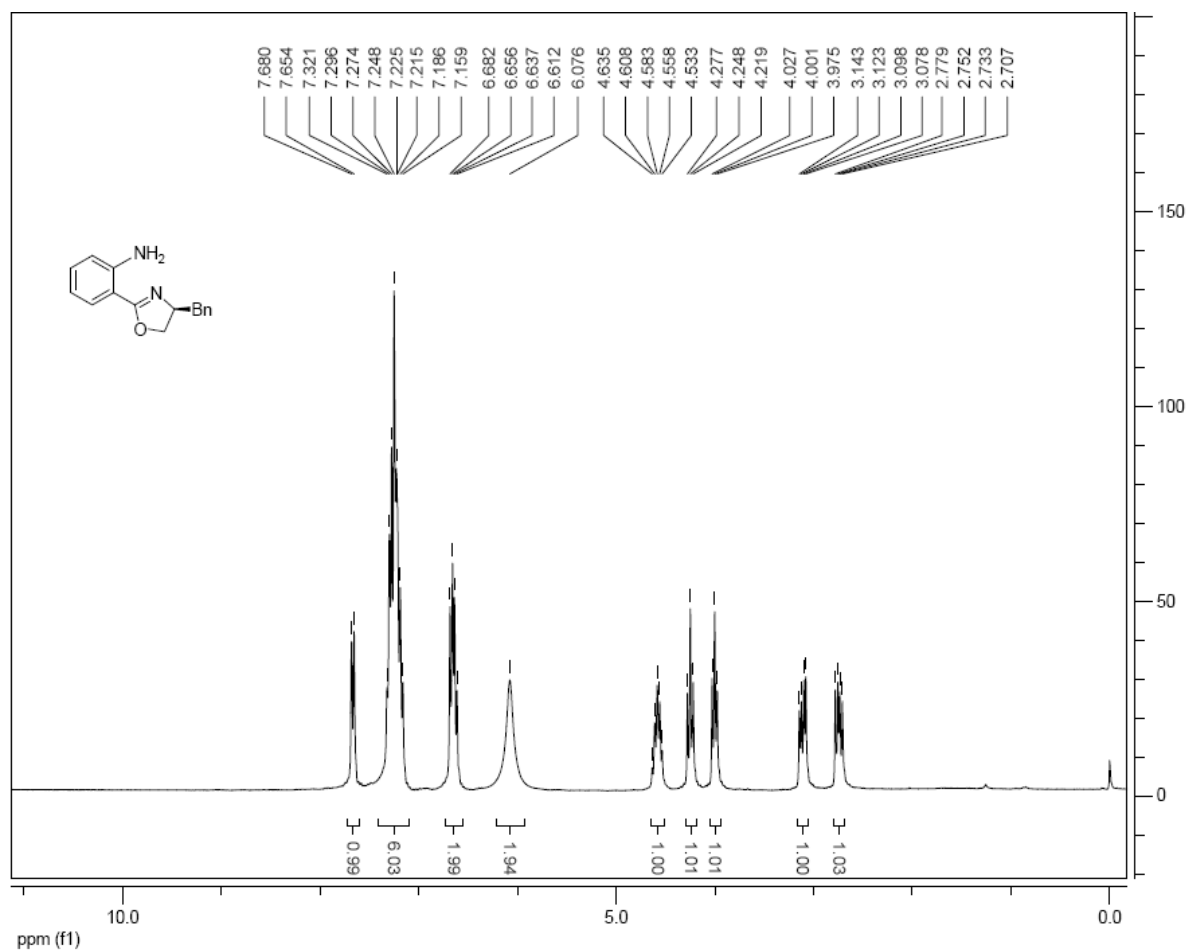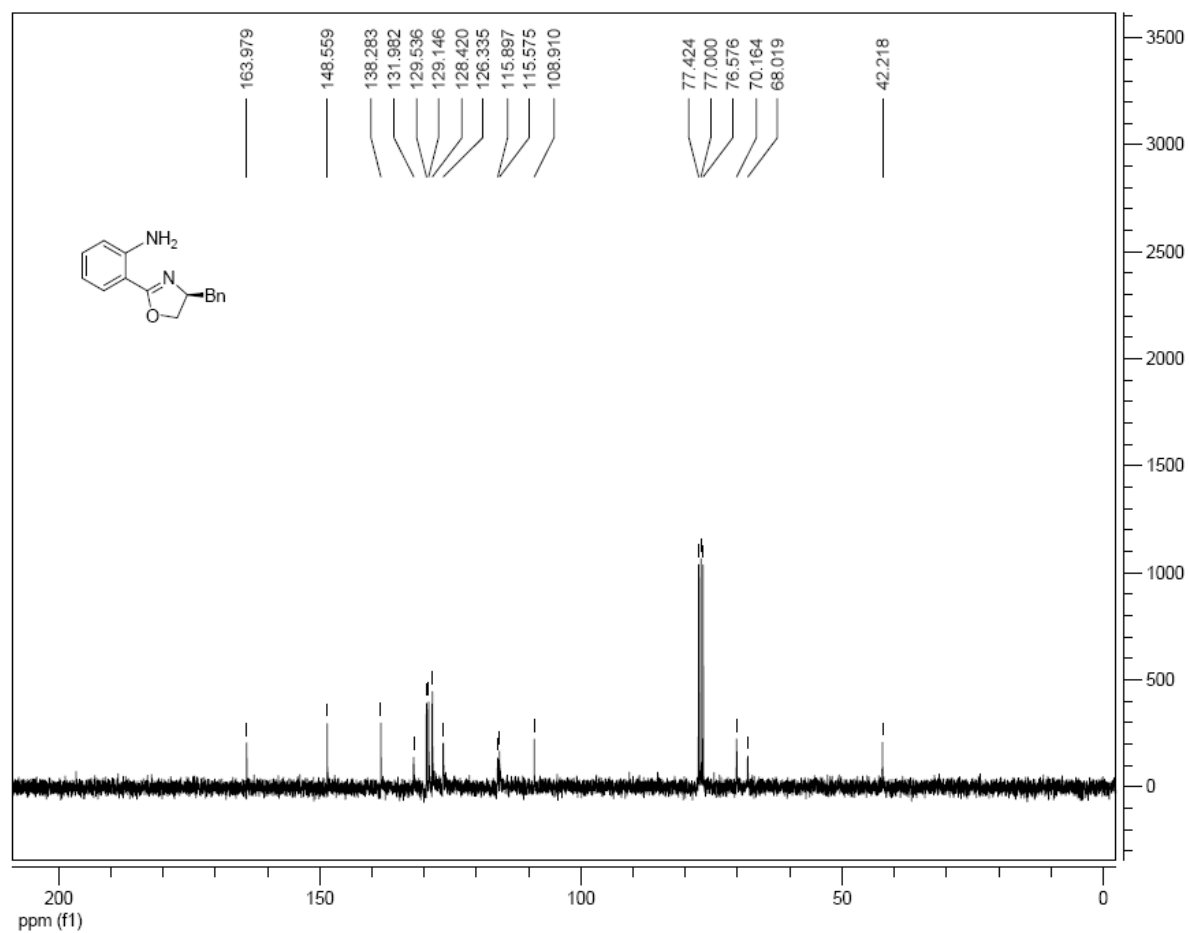

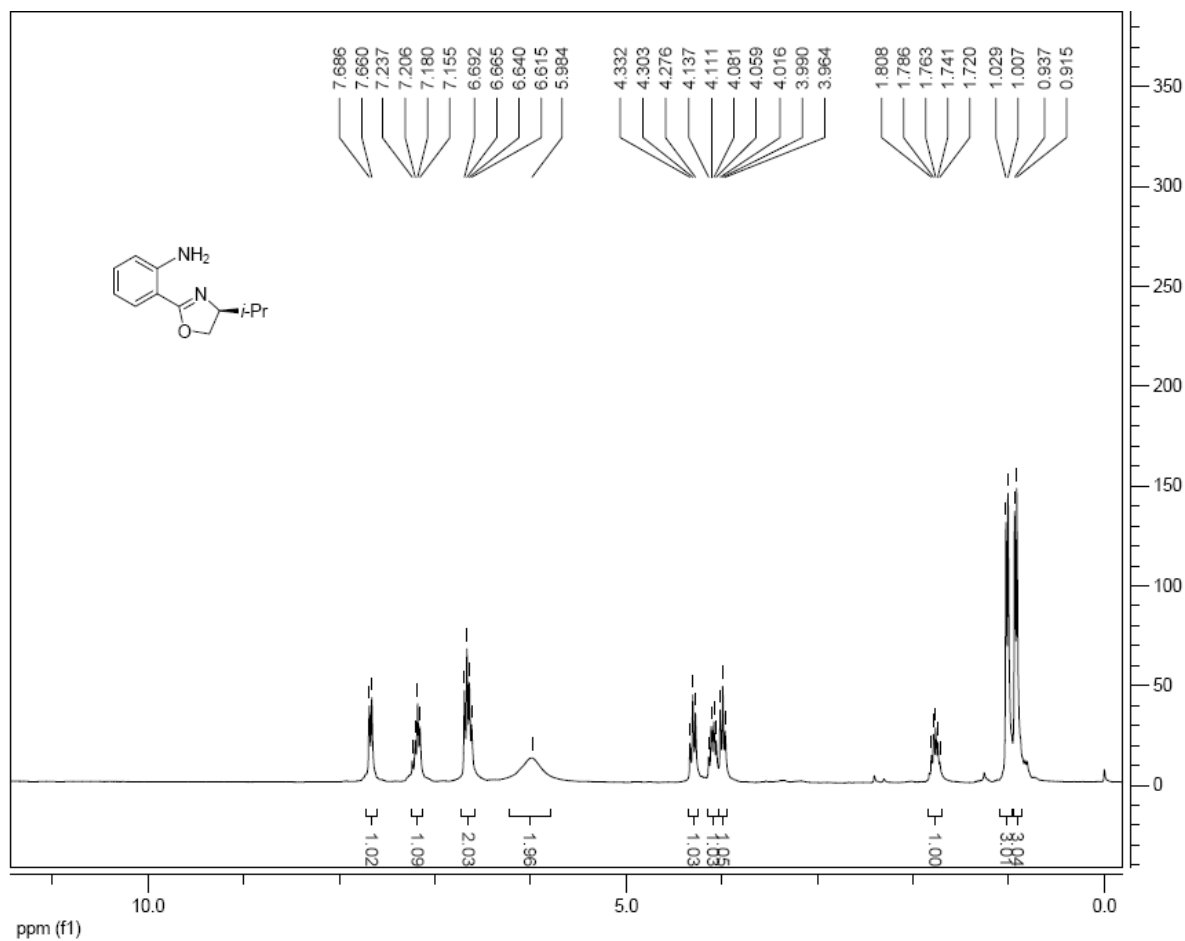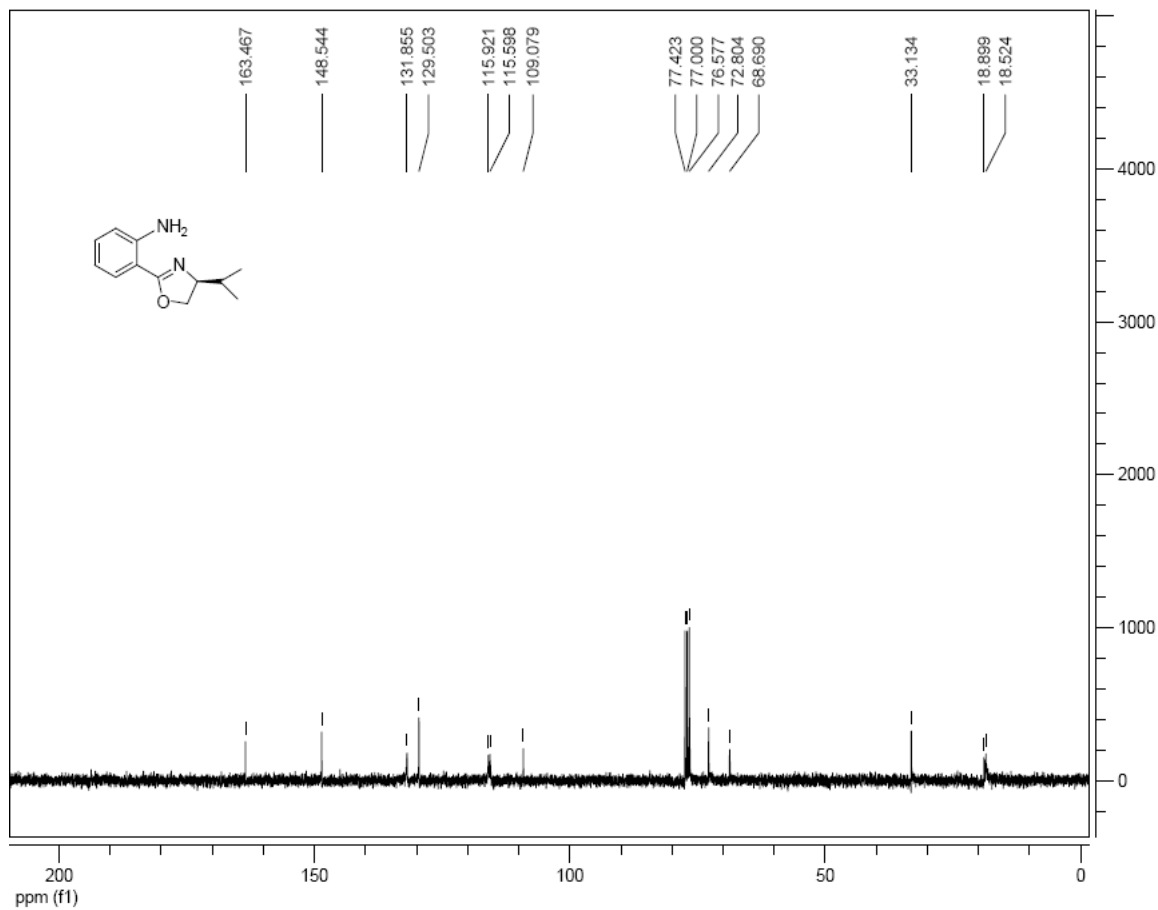

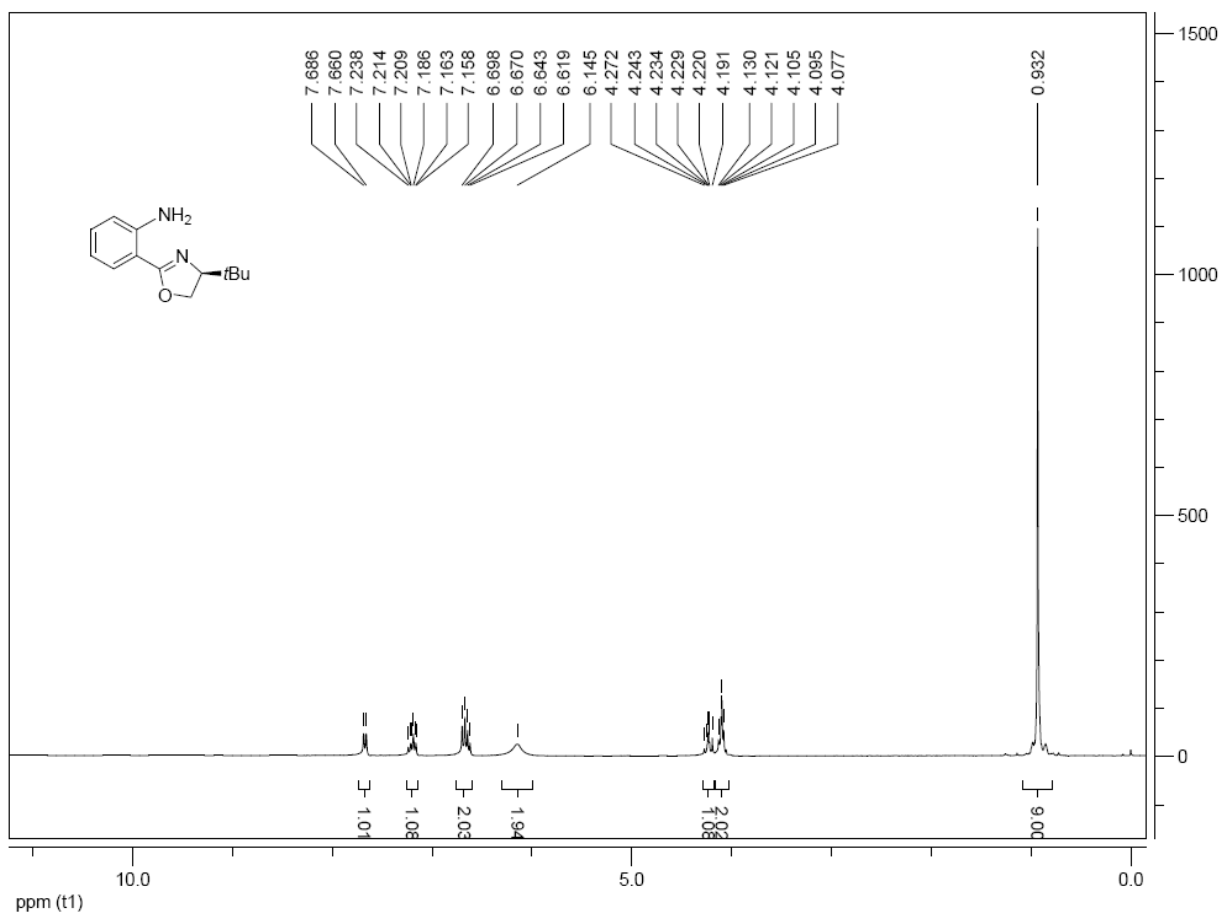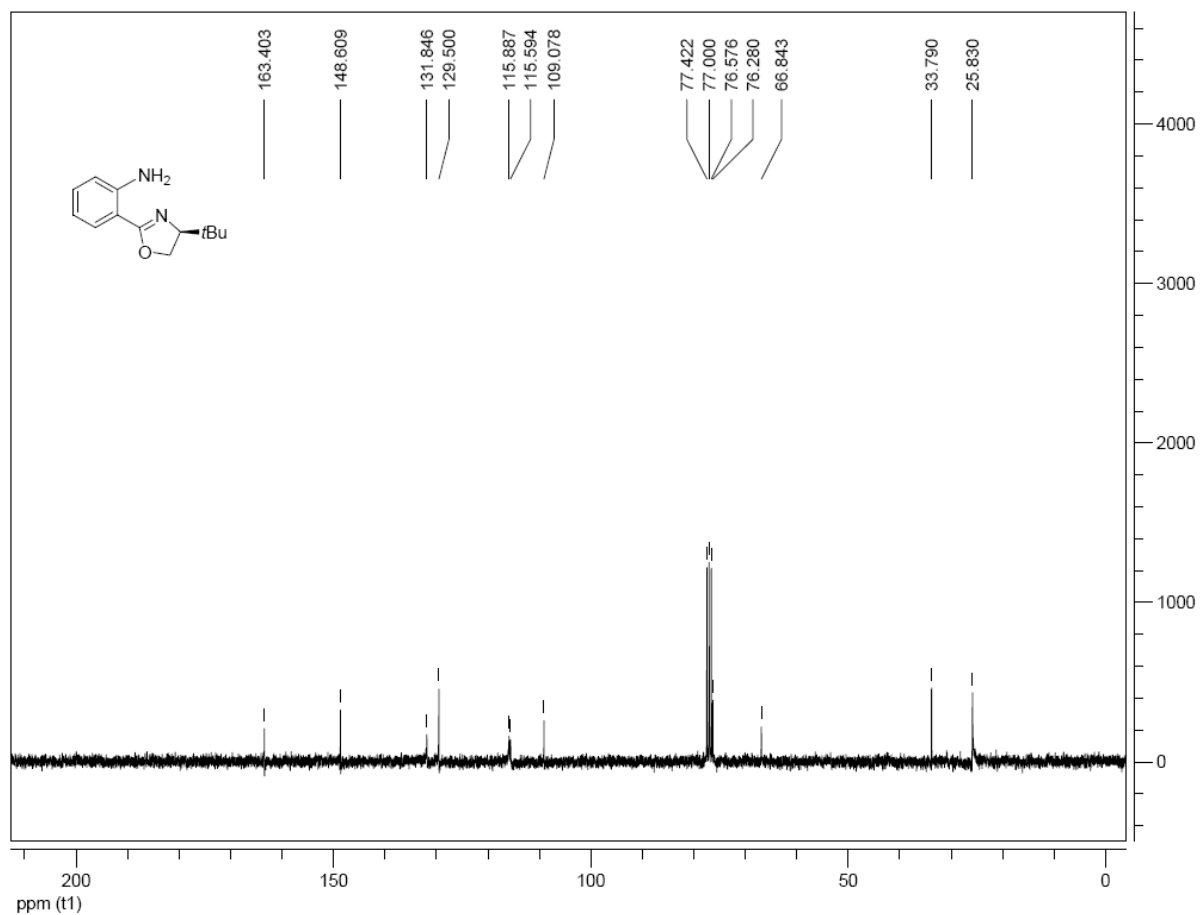

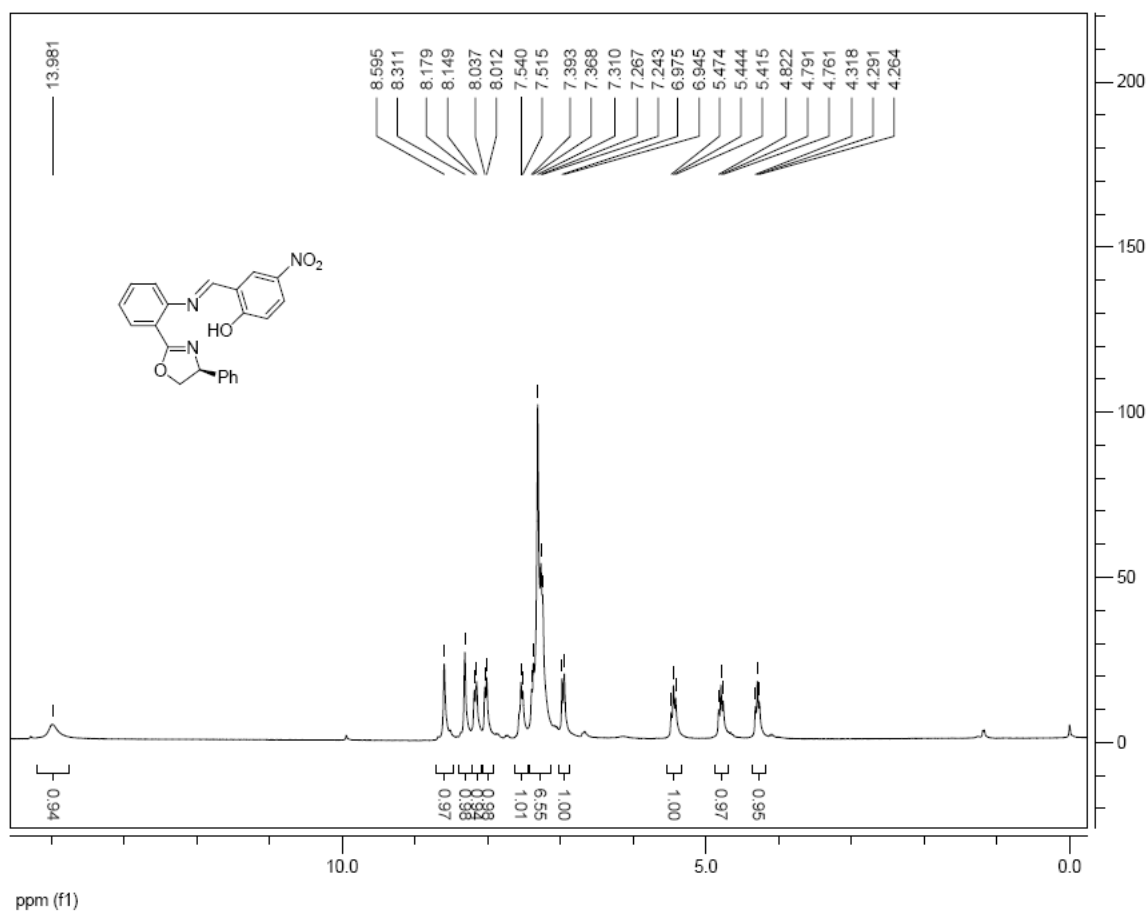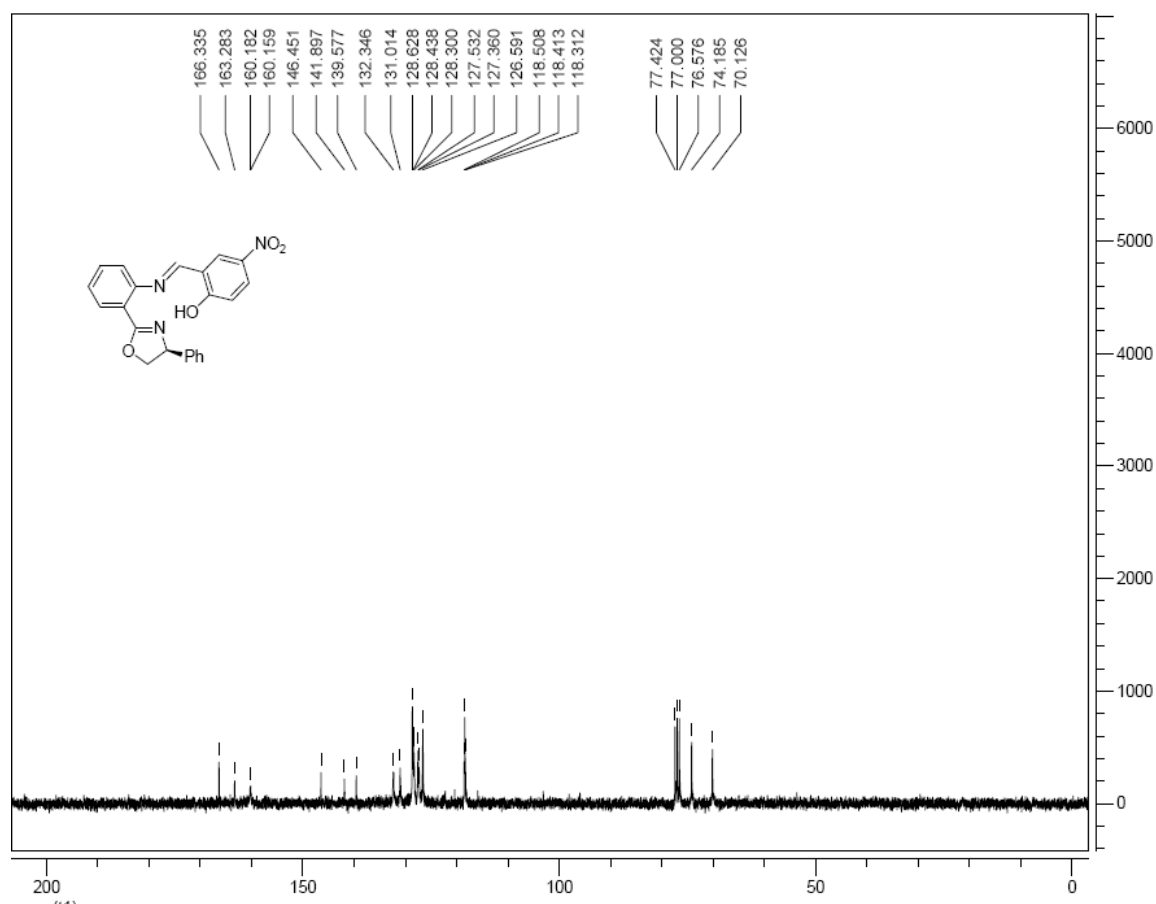

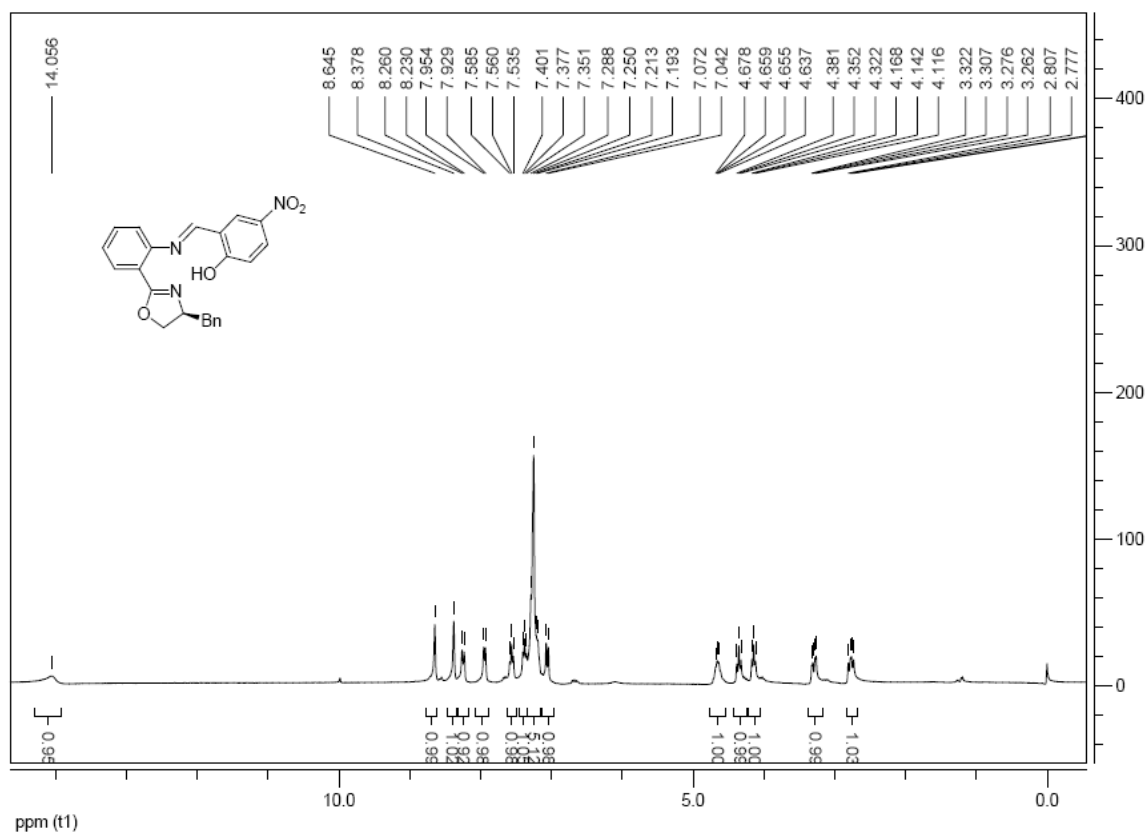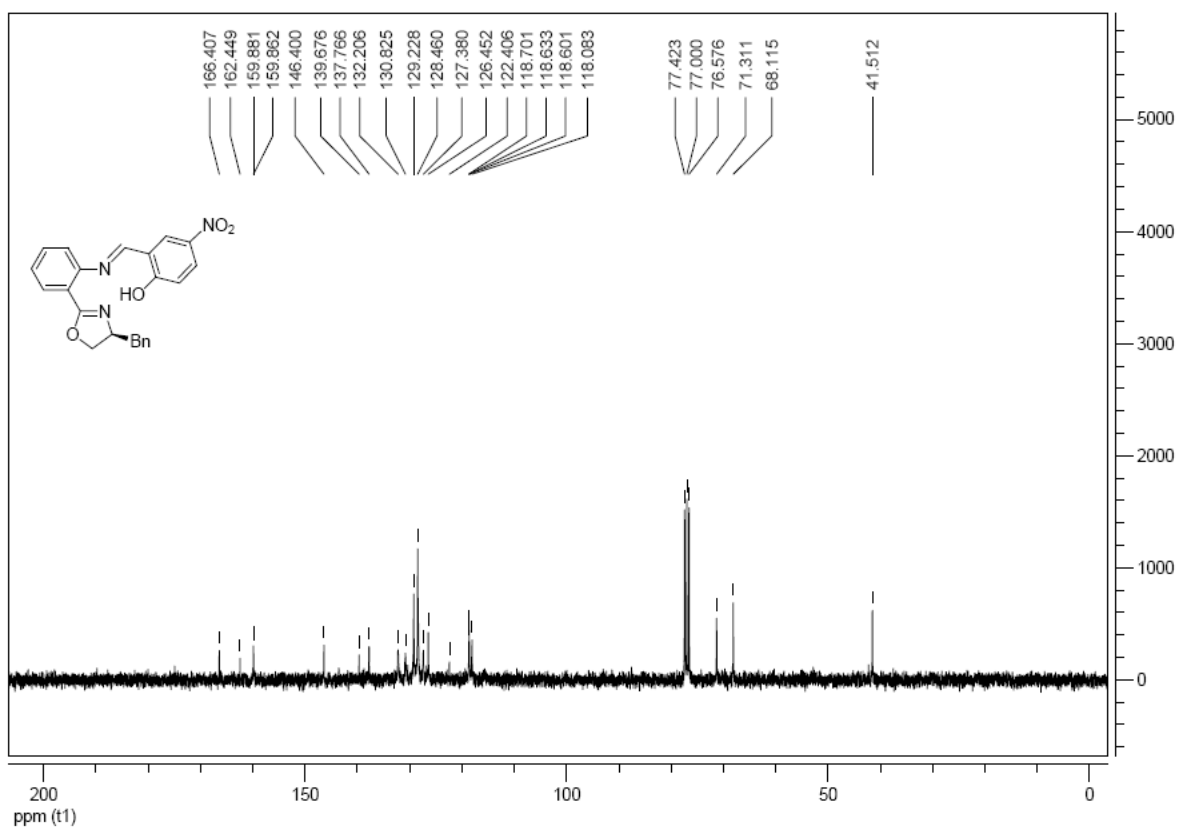

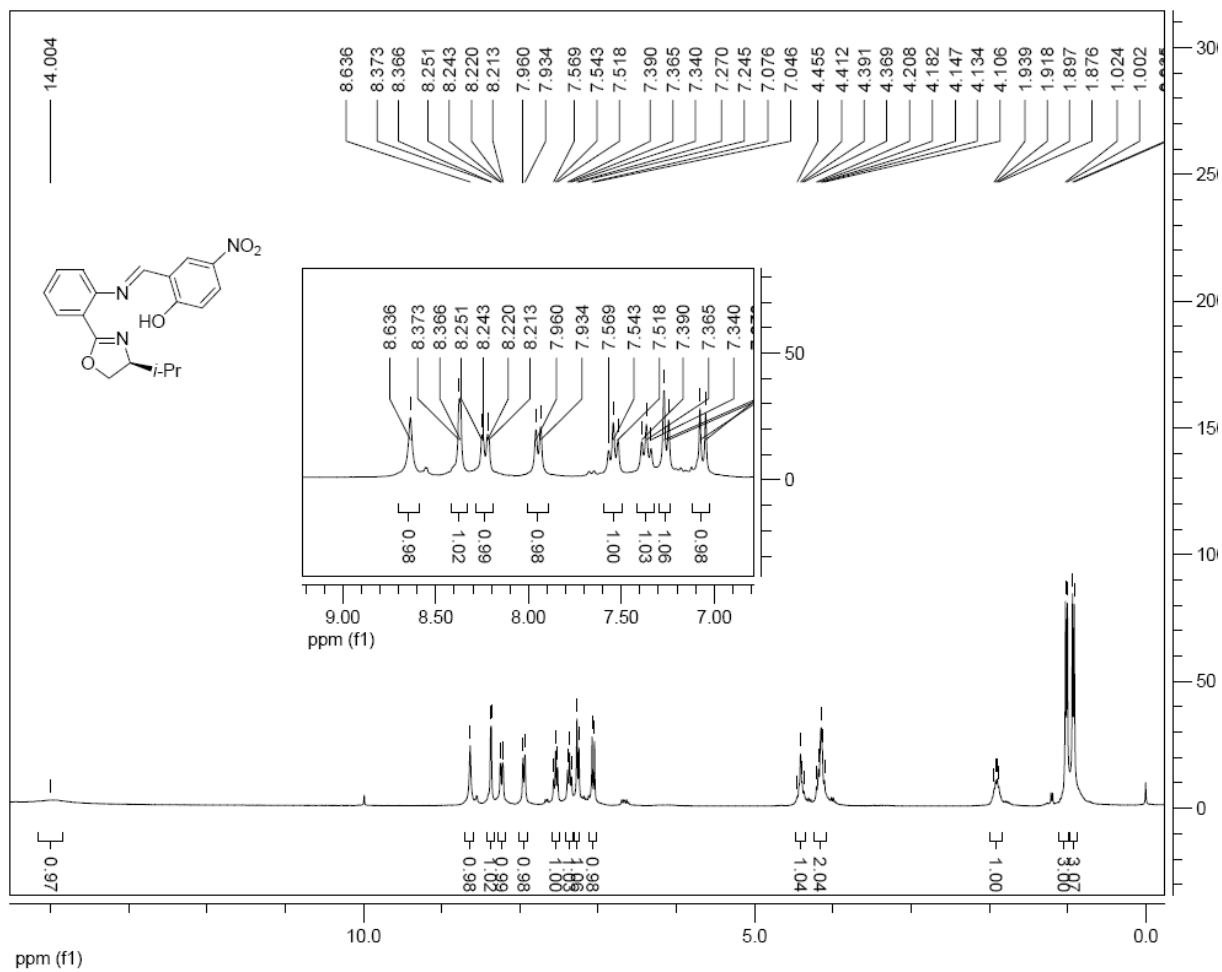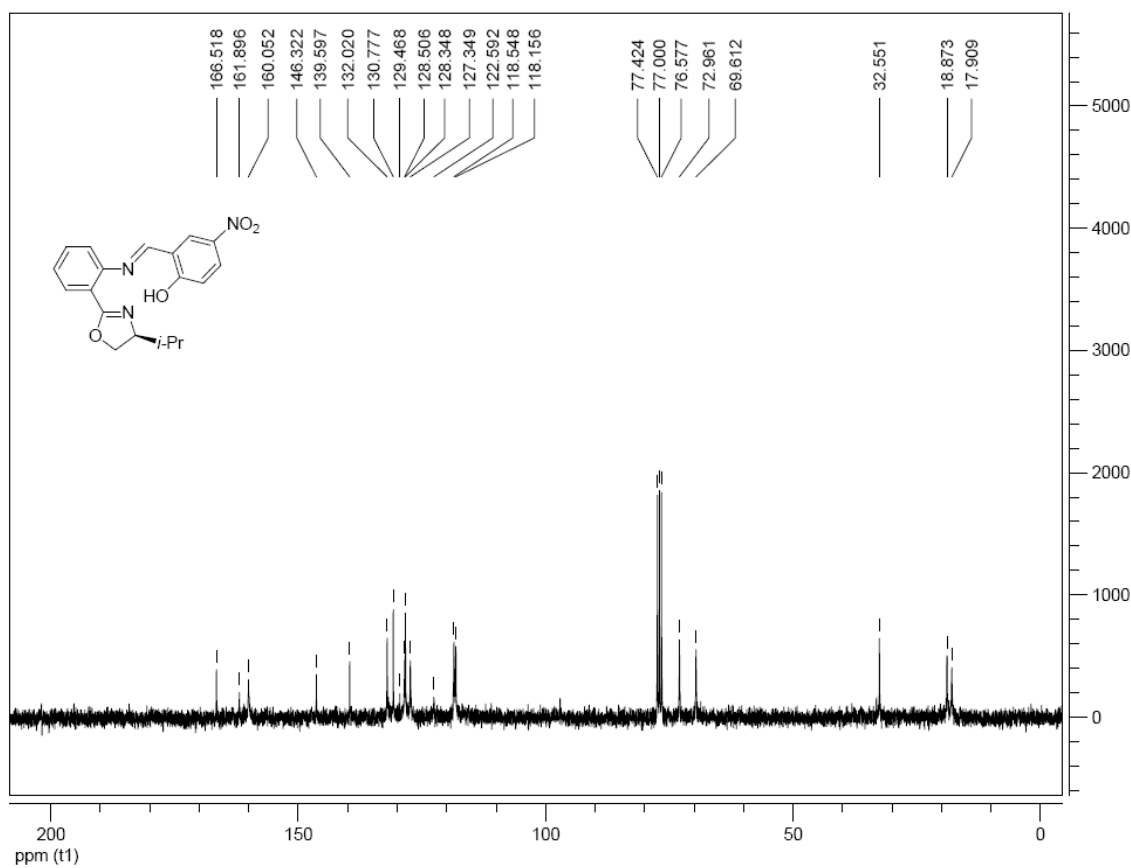

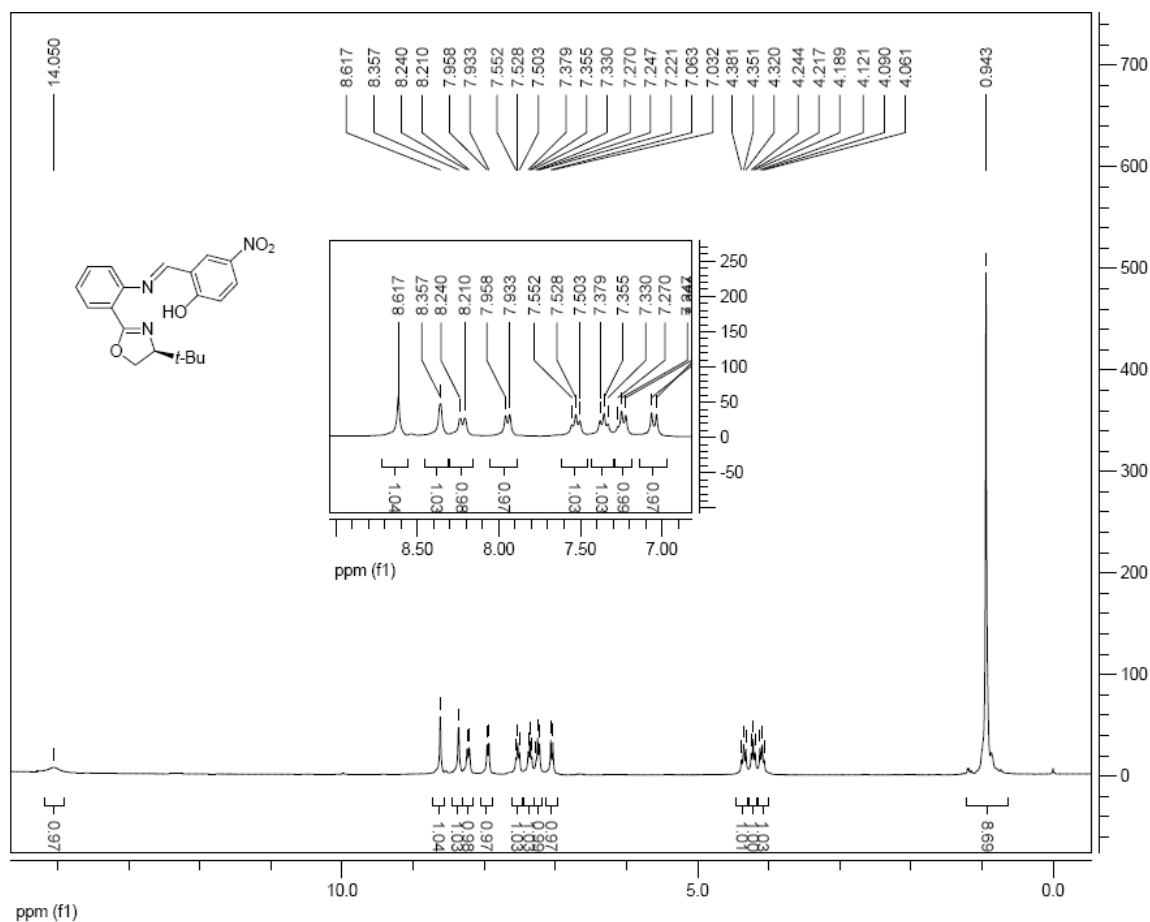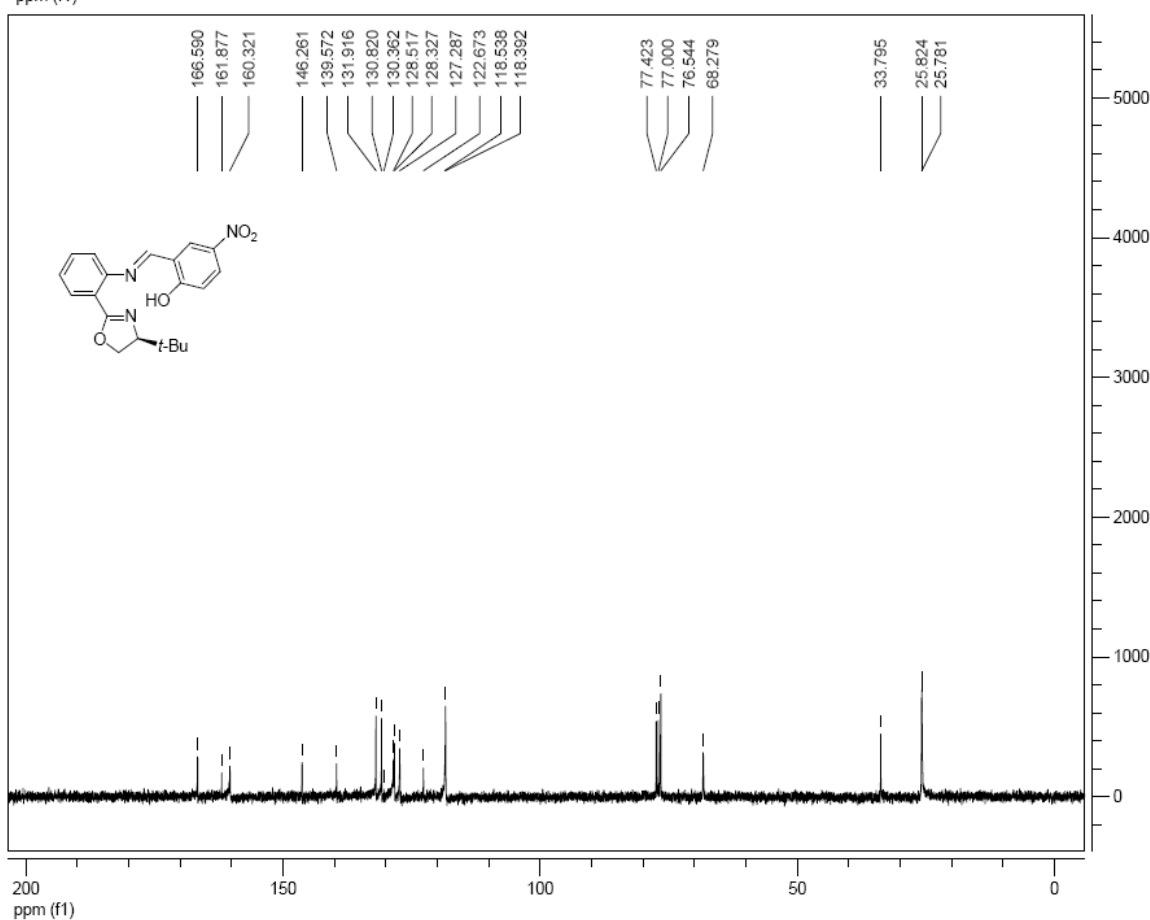



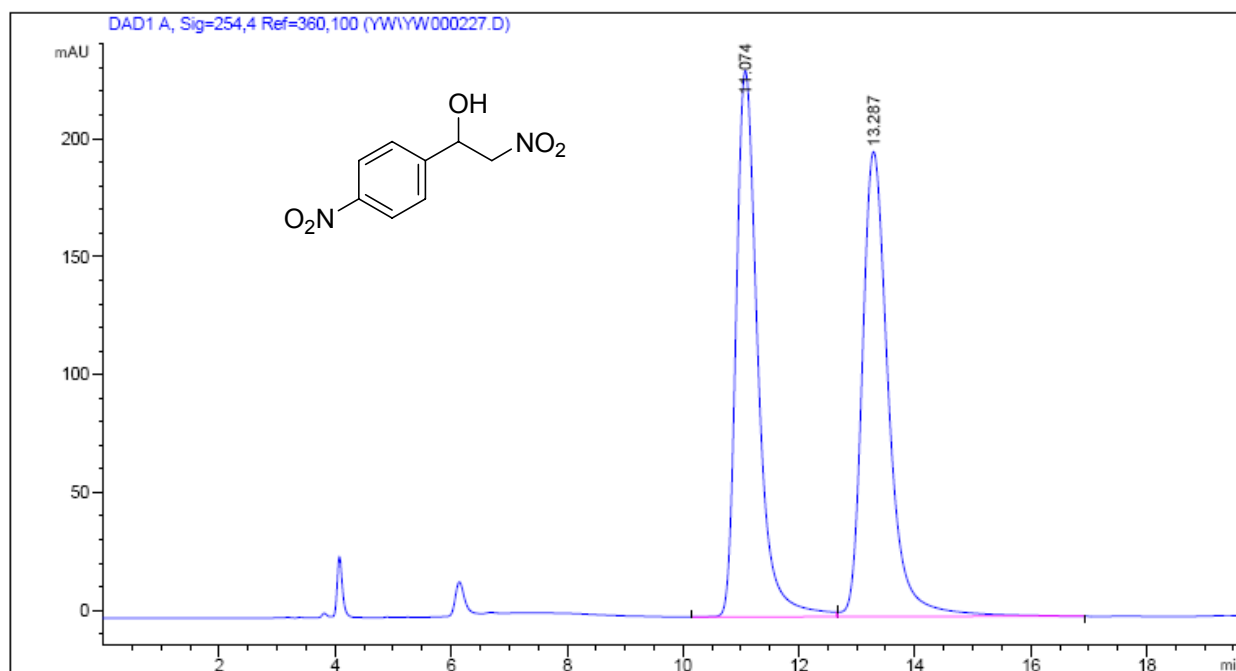

| 峰 # | 保留时间 [min] | 类型 | 峰宽 [min] | 峰面积 [mAU*s] | 峰高 [mAU]  | 峰面积 %   |
|-----|------------|----|----------|-------------|-----------|---------|
| 1   | 11.074     | VV | 0.3962   | 6041.87549  | 231.73190 | 49.3063 |
| 2   | 13.287     | VB | 0.4836   | 6211.89648  | 197.17511 | 50.6937 |

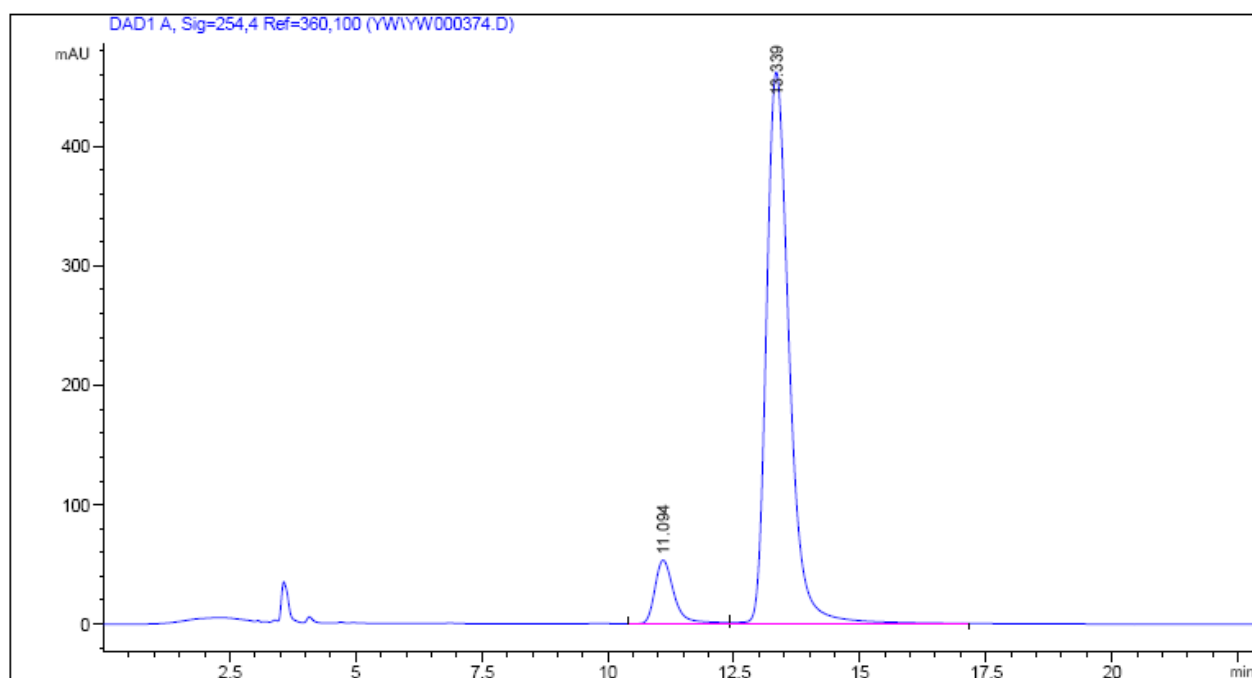

| 峰 # | 保留时间 [min] | 类型 | 峰宽 [min] | 峰面积 [mAU*s] | 峰高 [mAU]  | 峰面积 %   |
|-----|------------|----|----------|-------------|-----------|---------|
| 1   | 11.094     | VV | 0.4060   | 1413.33569  | 53.18480  | 8.8870  |
| 2   | 13.339     | VB | 0.4861   | 1.44902e4   | 461.74069 | 91.1130 |

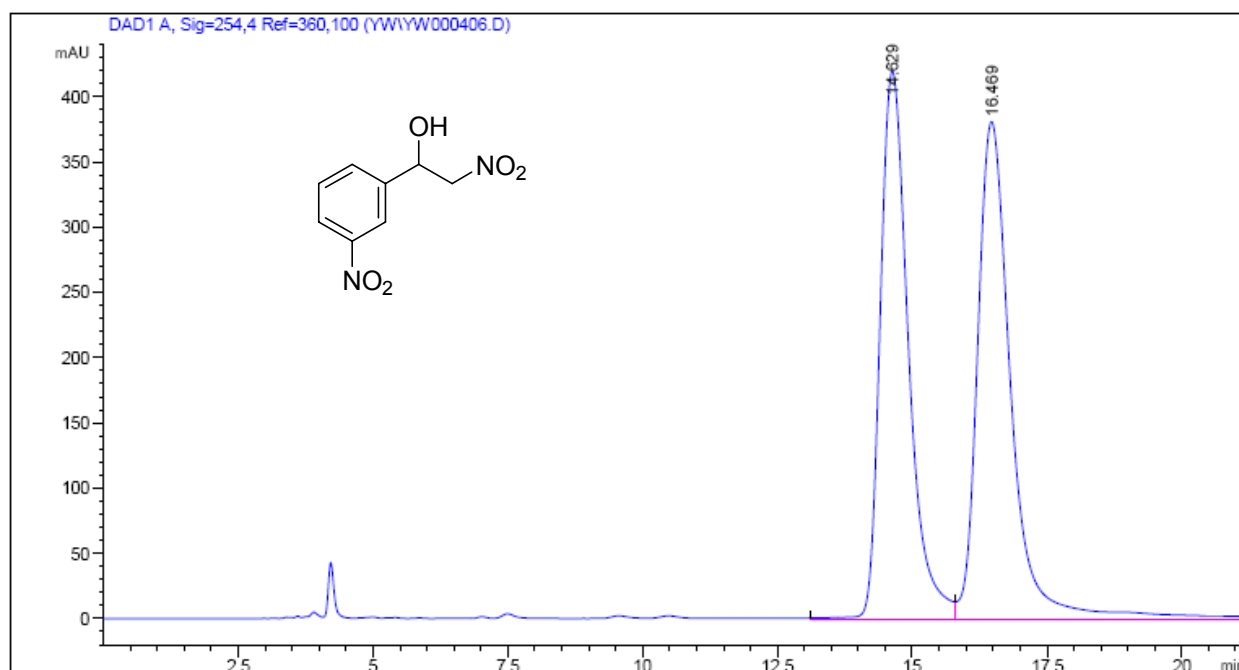

| 峰 # | 保留时间 [min] | 类型  | 峰宽 [min] | 峰面积 [mAU*s] | 峰高 [mAU]  | 峰面积 %   |
|-----|------------|-----|----------|-------------|-----------|---------|
| 1   | 14.629     | BV  | 0.5591   | 1.52261e4   | 419.84897 | 47.9883 |
| 2   | 16.469     | VBA | 0.6572   | 1.65027e4   | 381.08875 | 52.0117 |

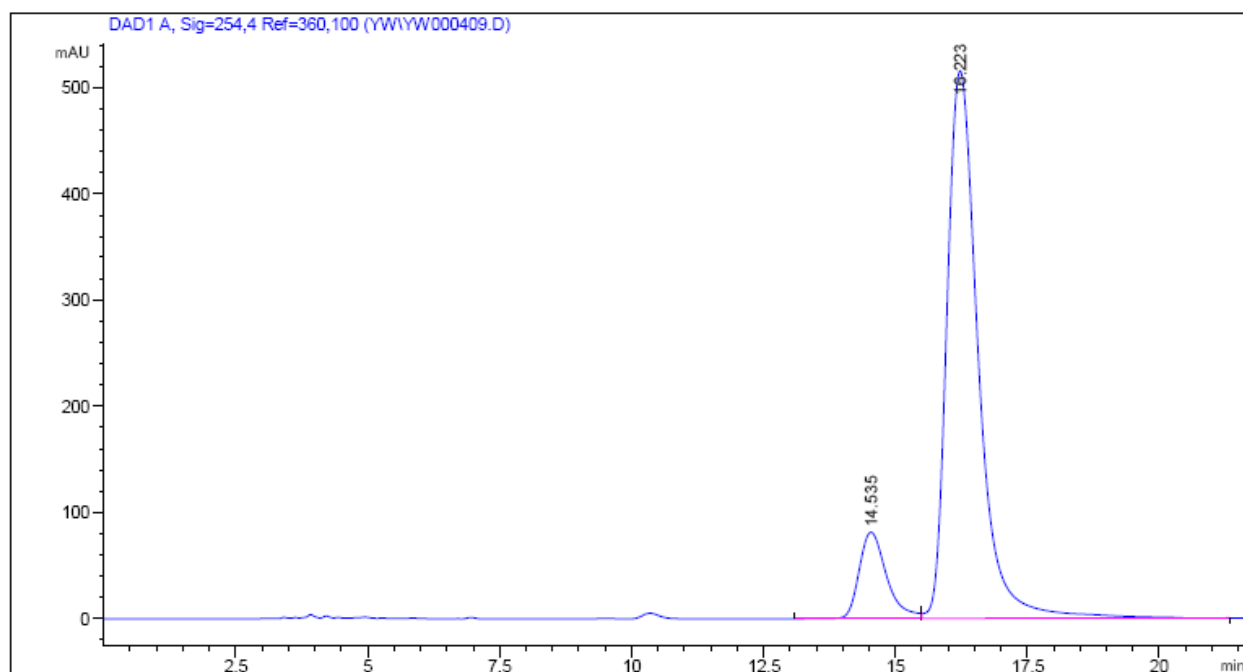

信号 1: DAD1 A, Sig=254,4 Ref=360,100

| 峰 # | 保留时间 [min] | 类型 | 峰宽 [min] | 峰面积 [mAU*s] | 峰高 [mAU]  | 峰面积 %   |
|-----|------------|----|----------|-------------|-----------|---------|
| 1   | 14.535     | BV | 0.5551   | 2953.59473  | 81.44023  | 12.1638 |
| 2   | 16.223     | VB | 0.6345   | 2.13283e4   | 515.68896 | 87.8362 |

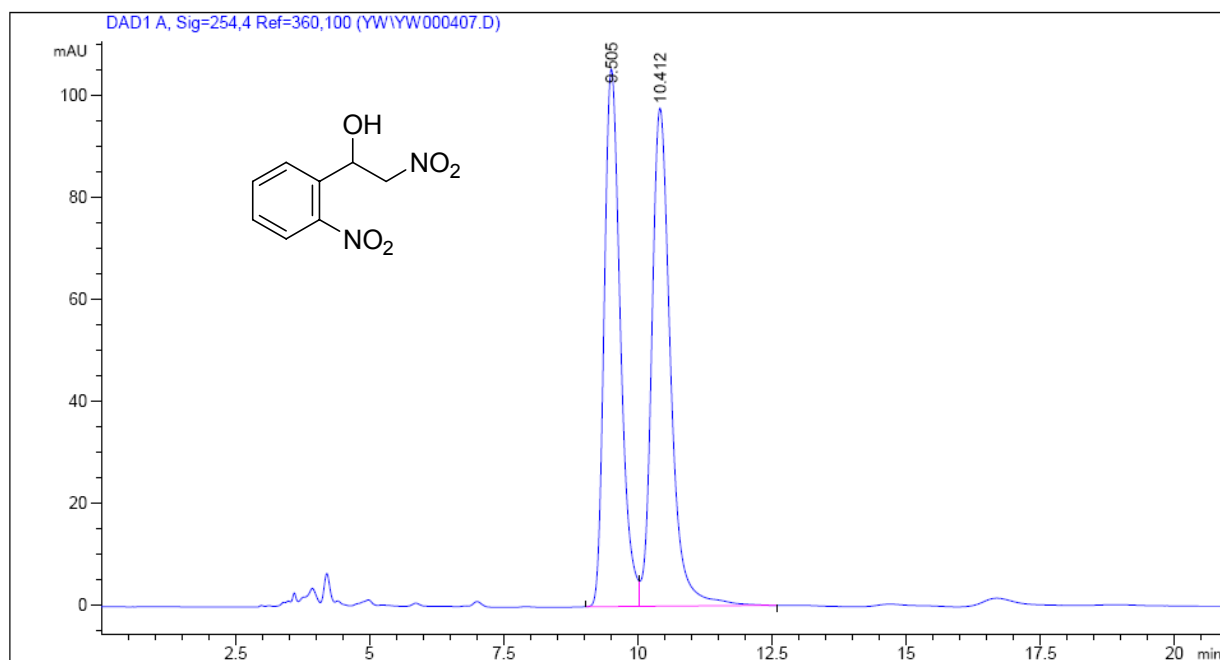

信号 1: DAD1 A, Sig=254,4 Ref=360,100

| 峰 # | 保留时间 [min] | 类型 | 峰宽 [min] | 峰面积 [mAU*s] | 峰高 [mAU]  | 峰面积 %   |
|-----|------------|----|----------|-------------|-----------|---------|
| 1   | 9.505      | BV | 0.3252   | 2216.81348  | 105.47421 | 48.2051 |
| 2   | 10.412     | VB | 0.3724   | 2381.89502  | 97.72131  | 51.7949 |

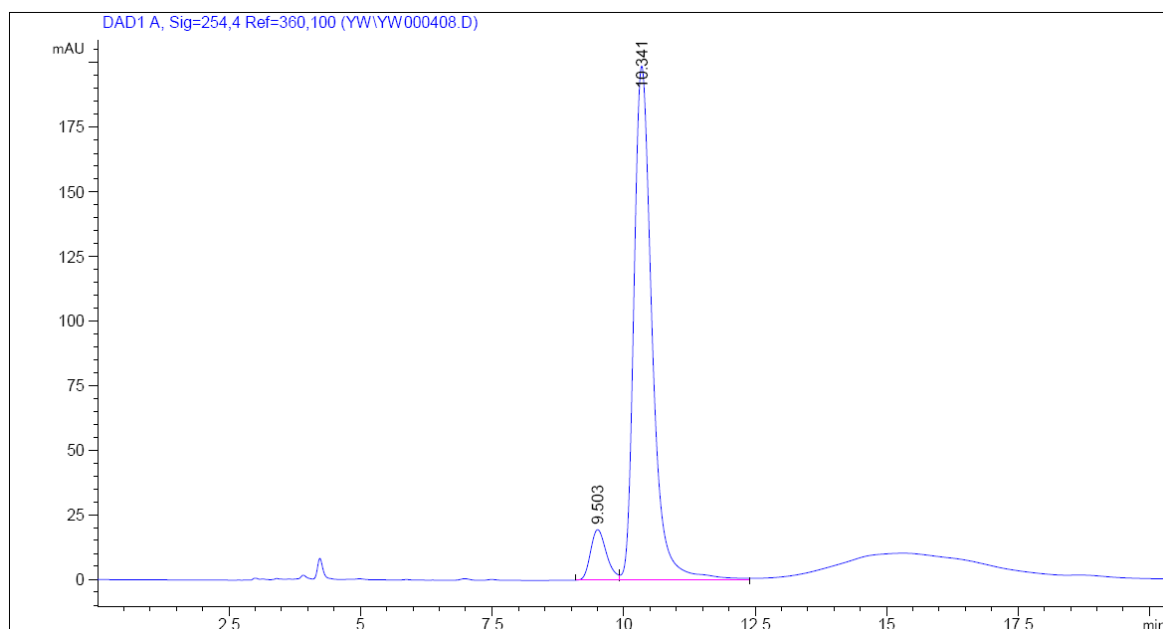

信号 1: DAD1 A, Sig=254,4 Ref=360,100

| 峰 # | 保留时间 [min] | 类型 | 峰宽 [min] | 峰面积 [mAU*s] | 峰高 [mAU]  | 峰面积 %   |
|-----|------------|----|----------|-------------|-----------|---------|
| 1   | 9.503      | BV | 0.3305   | 414.48679   | 19.61857  | 7.9371  |
| 2   | 10.341     | VB | 0.3698   | 4807.66992  | 199.04547 | 92.0629 |

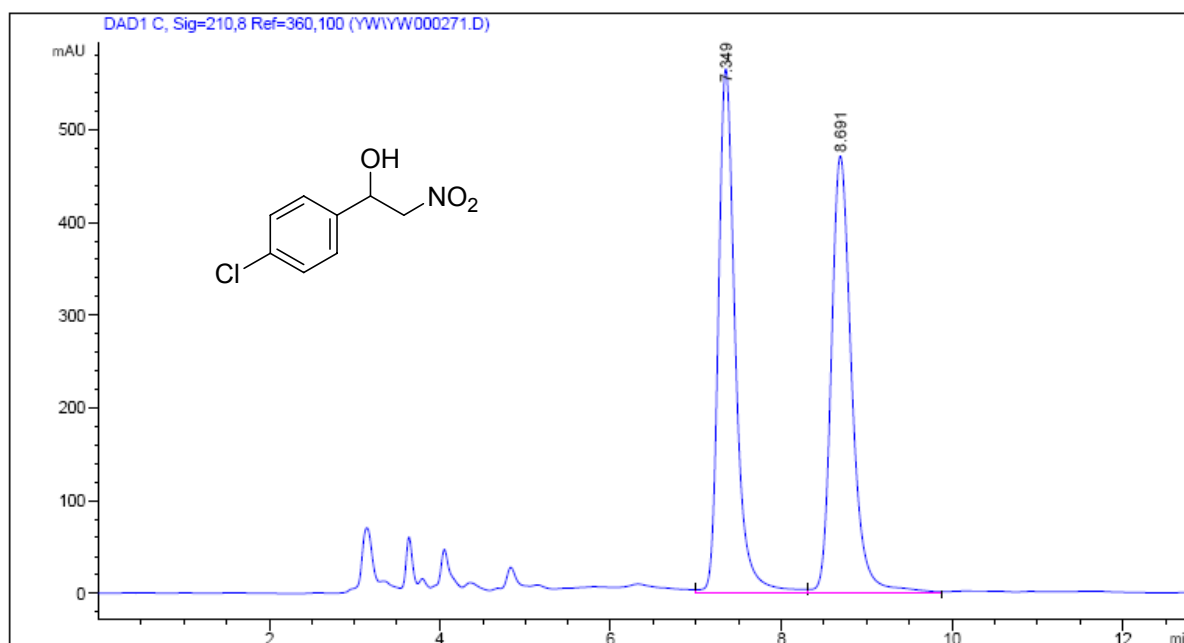

信号 1: DAD1 C, Sig=210,8 Ref=360,100

| 峰 # | 保留时间 [min] | 类型 | 峰宽 [min] | 峰面积 [mAU*s] | 峰高 [mAU]  | 峰面积 %   |
|-----|------------|----|----------|-------------|-----------|---------|
| 1   | 7.349      | VV | 0.2101   | 7871.92285  | 566.46179 | 49.9720 |
| 2   | 8.691      | VV | 0.2548   | 7880.75439  | 471.94147 | 50.0280 |

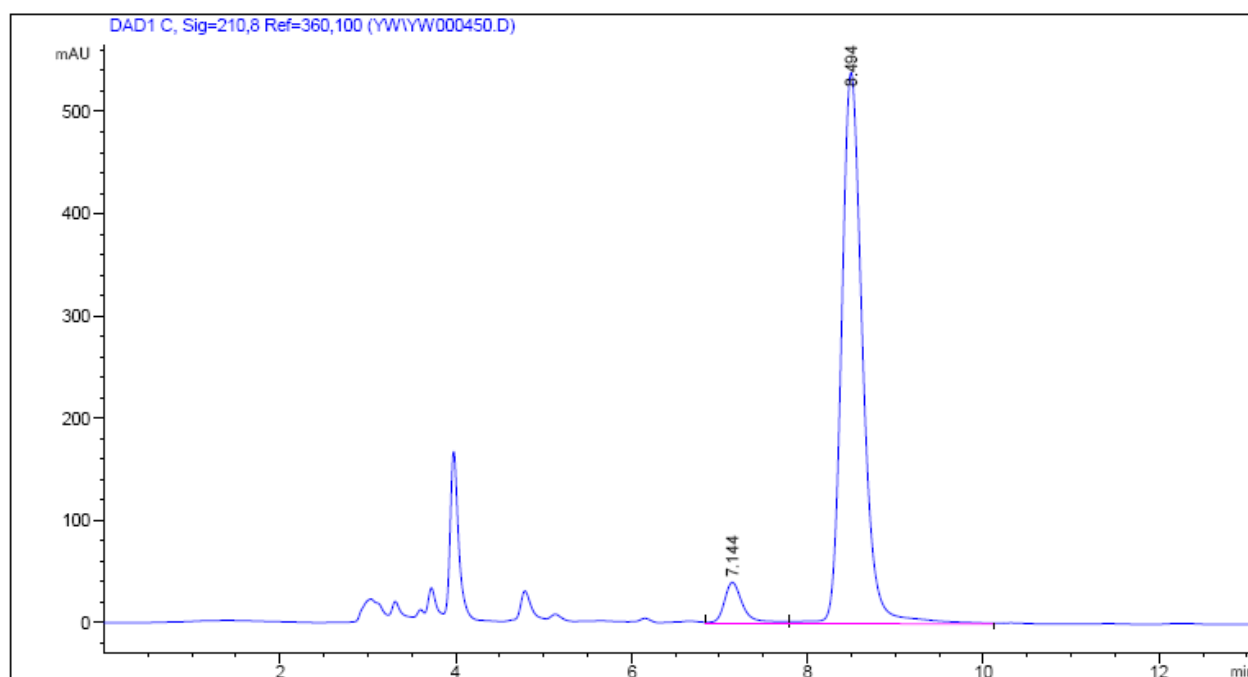

| 峰 # | 保留时间 [min] | 类型 | 峰宽 [min] | 峰面积 [mAU*s] | 峰高 [mAU]  | 峰面积 %   |
|-----|------------|----|----------|-------------|-----------|---------|
| 1   | 7.144      | VV | 0.2330   | 629.68567   | 40.59426  | 6.5226  |
| 2   | 8.494      | VV | 0.2591   | 9024.23730  | 539.50366 | 93.4774 |

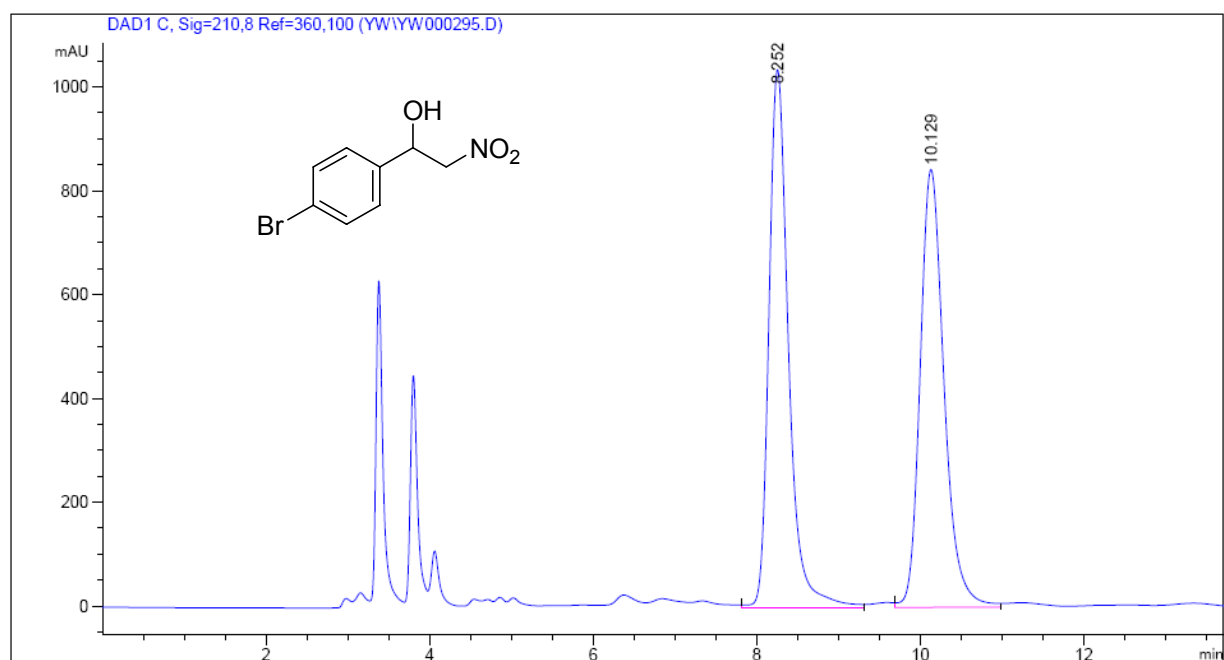

| 峰 # | 保留时间 [min] | 类型 | 峰宽 [min] | 峰面积 [mAU*s] | 峰高 [mAU]   | 峰面积 %   |
|-----|------------|----|----------|-------------|------------|---------|
| 1   | 8.252      | VV | 0.2586   | 1.72623e4   | 1034.71265 | 50.1315 |
| 2   | 10.129     | VV | 0.3136   | 1.71718e4   | 843.01593  | 49.8685 |

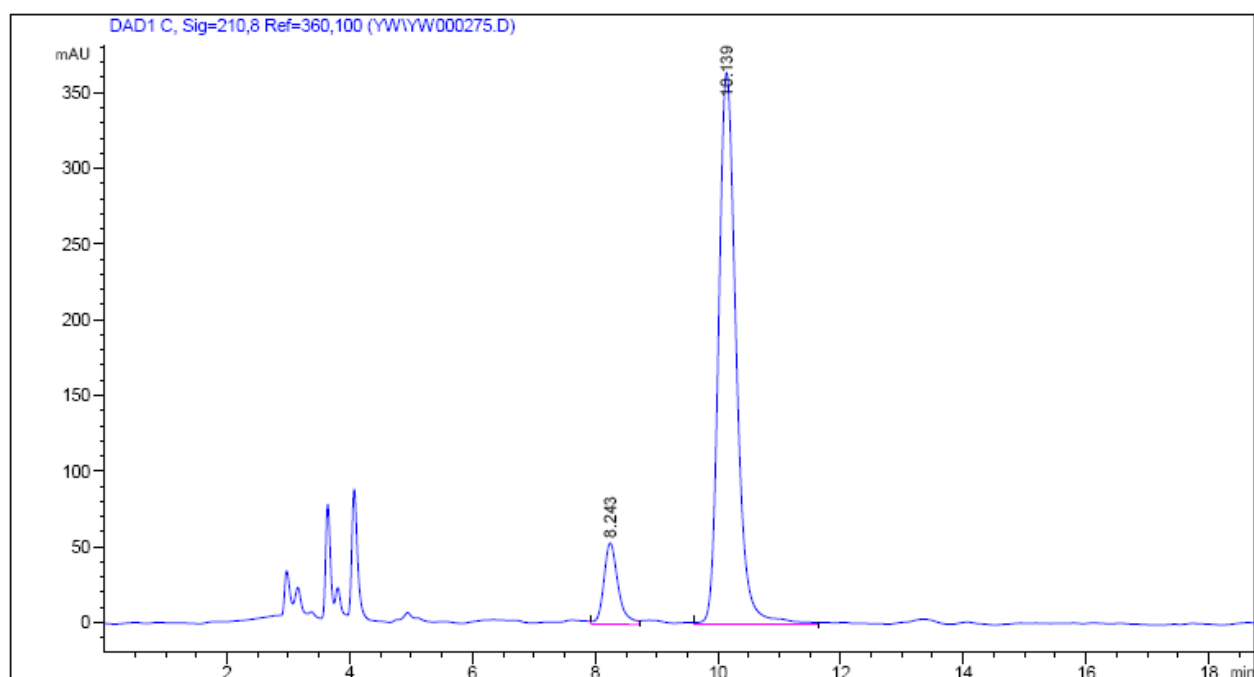

信号 1: DAD1 C, Sig=210,8 Ref=360,100

| 峰 # | 保留时间 [min] | 类型 | 峰宽 [min] | 峰面积 [mAU*s] | 峰高 [mAU]  | 峰面积 %   |
|-----|------------|----|----------|-------------|-----------|---------|
| 1   | 8.243      | VV | 0.2495   | 873.66132   | 53.78755  | 10.7057 |
| 2   | 10.139     | VV | 0.3092   | 7287.06934  | 364.55786 | 89.2943 |

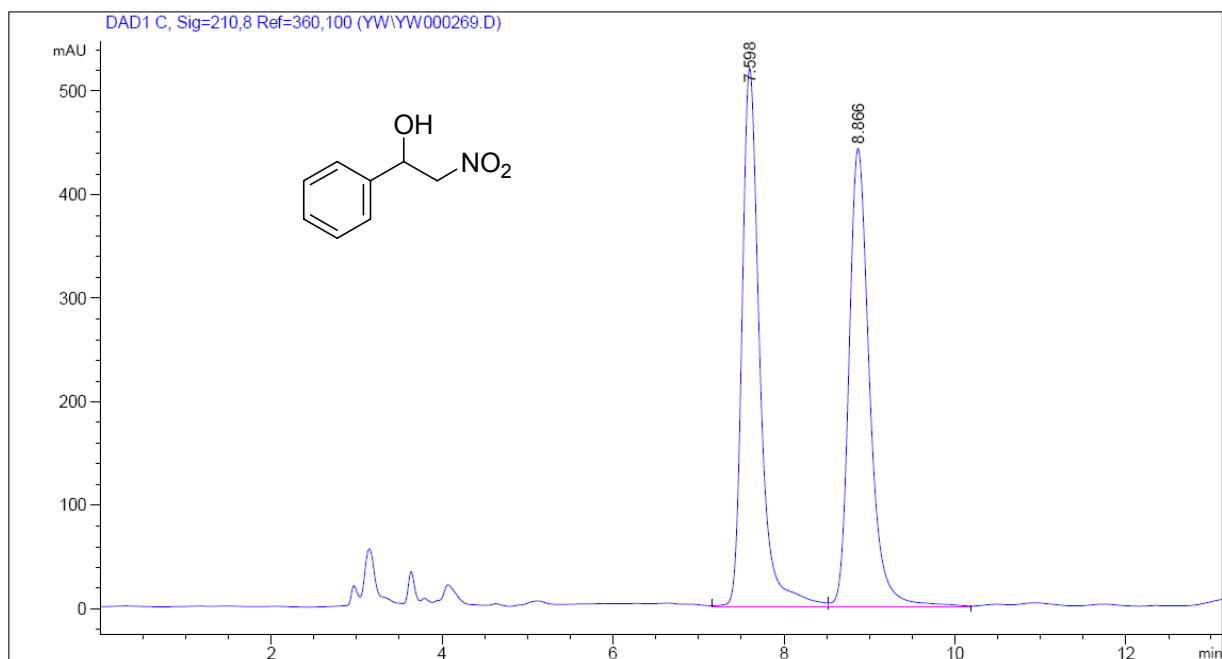

| 峰 # | 保留时间 [min] | 类型 | 峰宽 [min] | 峰面积 [mAU*s] | 峰高 [mAU]  | 峰面积 %   |
|-----|------------|----|----------|-------------|-----------|---------|
| 1   | 7.598      | VV | 0.2202   | 7494.69238  | 519.87598 | 50.3259 |
| 2   | 8.866      | VV | 0.2551   | 7397.62451  | 442.33167 | 49.6741 |

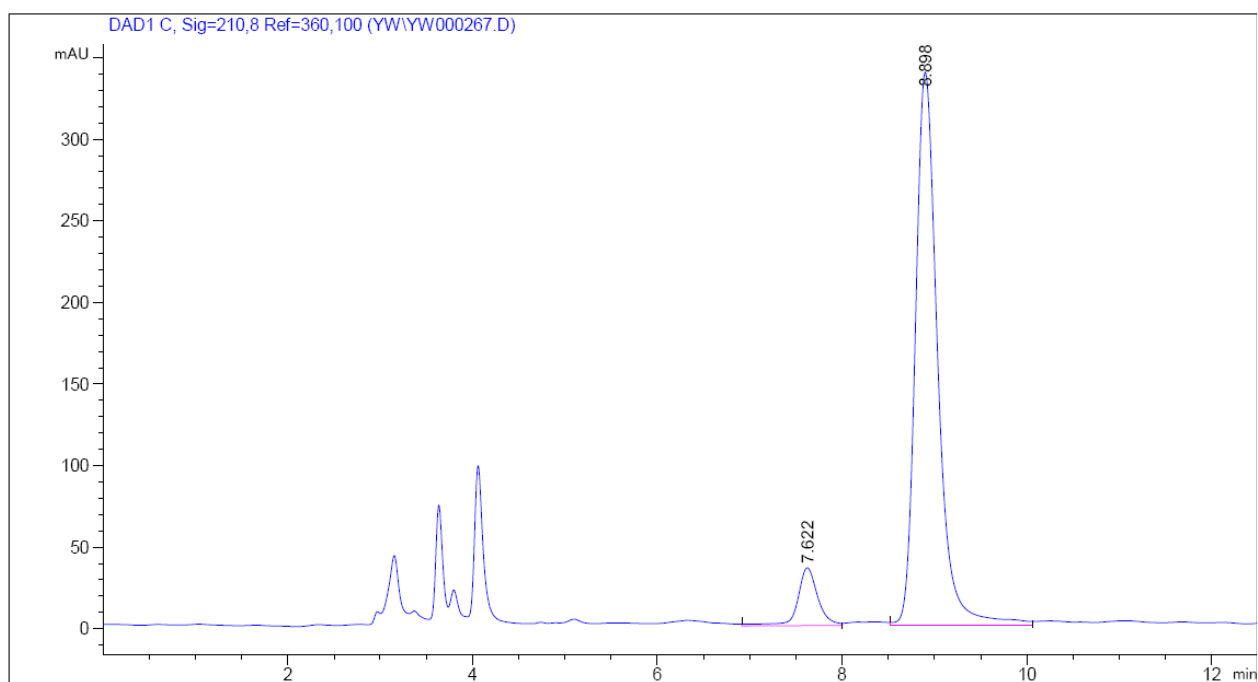

信号 1: DAD1 C, Sig=210,8 Ref=360,100

| 峰 # | 保留时间 [min] | 类型 | 峰宽 [min] | 峰面积 [mAU*s] | 峰高 [mAU]  | 峰面积 %   |
|-----|------------|----|----------|-------------|-----------|---------|
| 1   | 7.622      | VV | 0.2316   | 547.75702   | 35.58683  | 8.7597  |
| 2   | 8.898      | VV | 0.2562   | 5705.37793  | 339.17325 | 91.2403 |

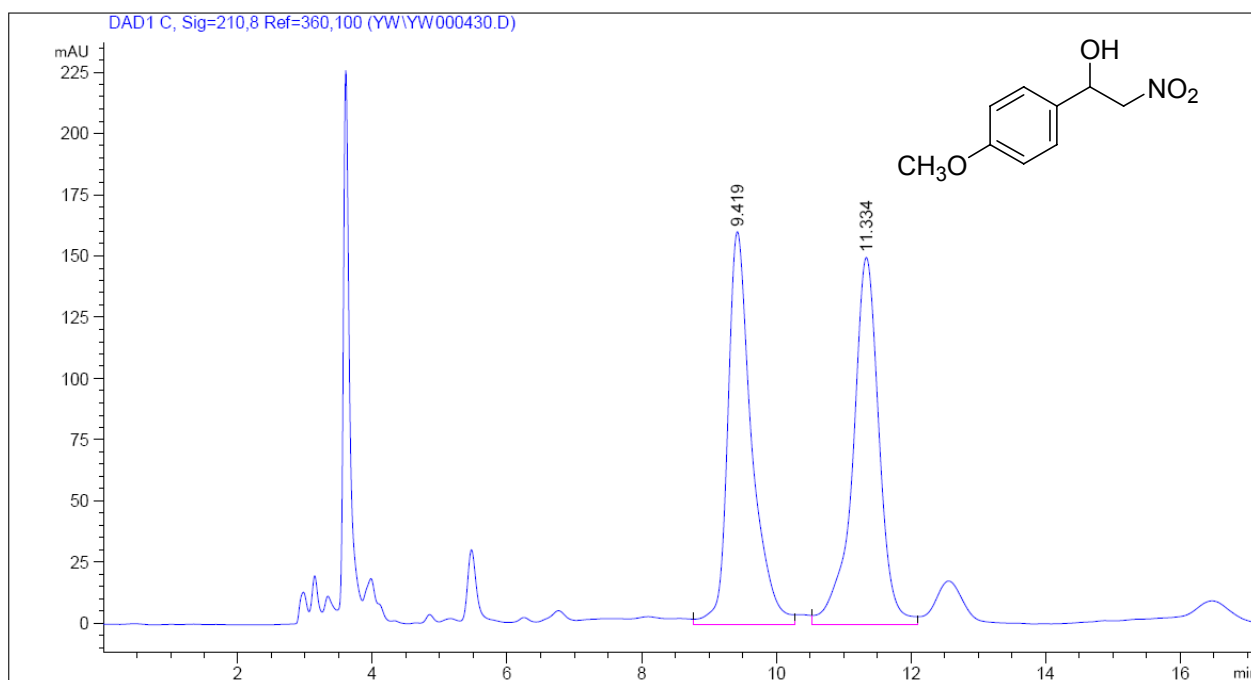

信号 1: DAD1 C, Sig=210,8 Ref=360,100

| 峰 # | 保留时间 [min] | 类型 | 峰宽 [min] | 峰面积 [mAU*s] | 峰高 [mAU]  | 峰面积 %   |
|-----|------------|----|----------|-------------|-----------|---------|
| 1   | 9.419      | VV | 0.3642   | 3961.35840  | 160.35280 | 49.2486 |
| 2   | 11.334     | VV | 0.4098   | 4082.24292  | 149.86810 | 50.7514 |

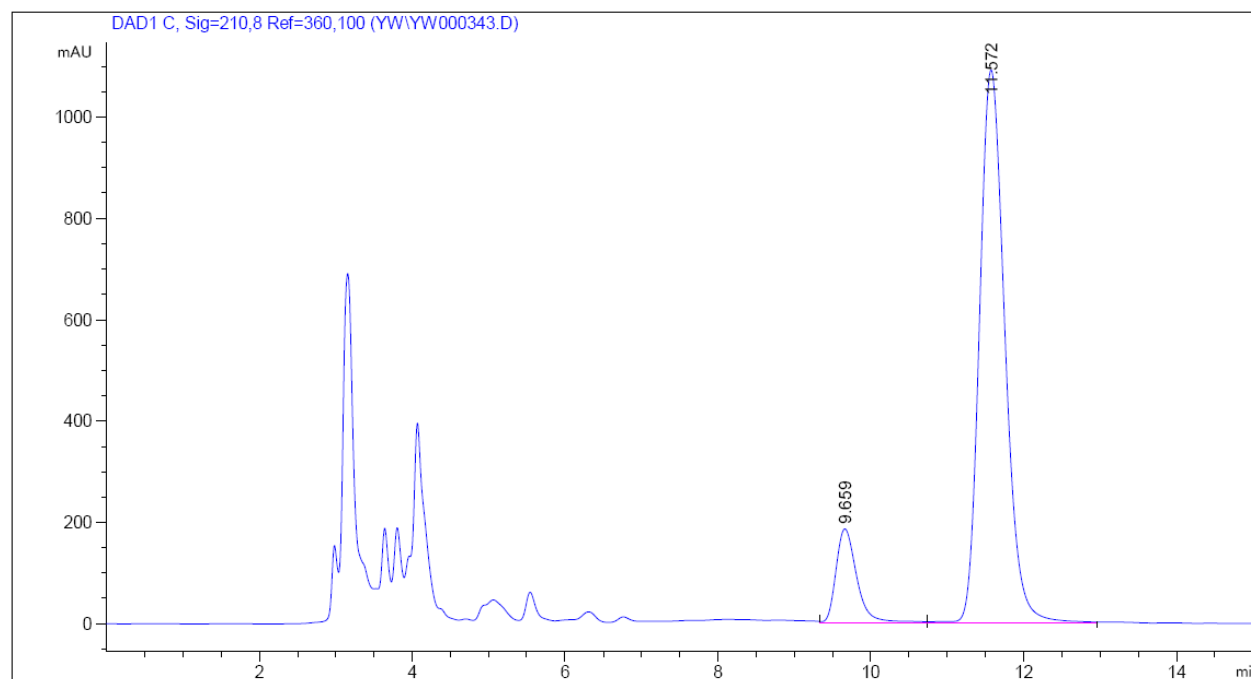

| 峰 # | 保留时间 [min] | 类型 | 峰宽 [min] | 峰面积 [mAU*s] | 峰高 [mAU]   | 峰面积 %   |
|-----|------------|----|----------|-------------|------------|---------|
| 1   | 9.659      | VV | 0.2967   | 3668.70679  | 187.15082  | 12.6556 |
| 2   | 11.572     | VV | 0.3584   | 2.53202e4   | 1092.46655 | 87.3444 |

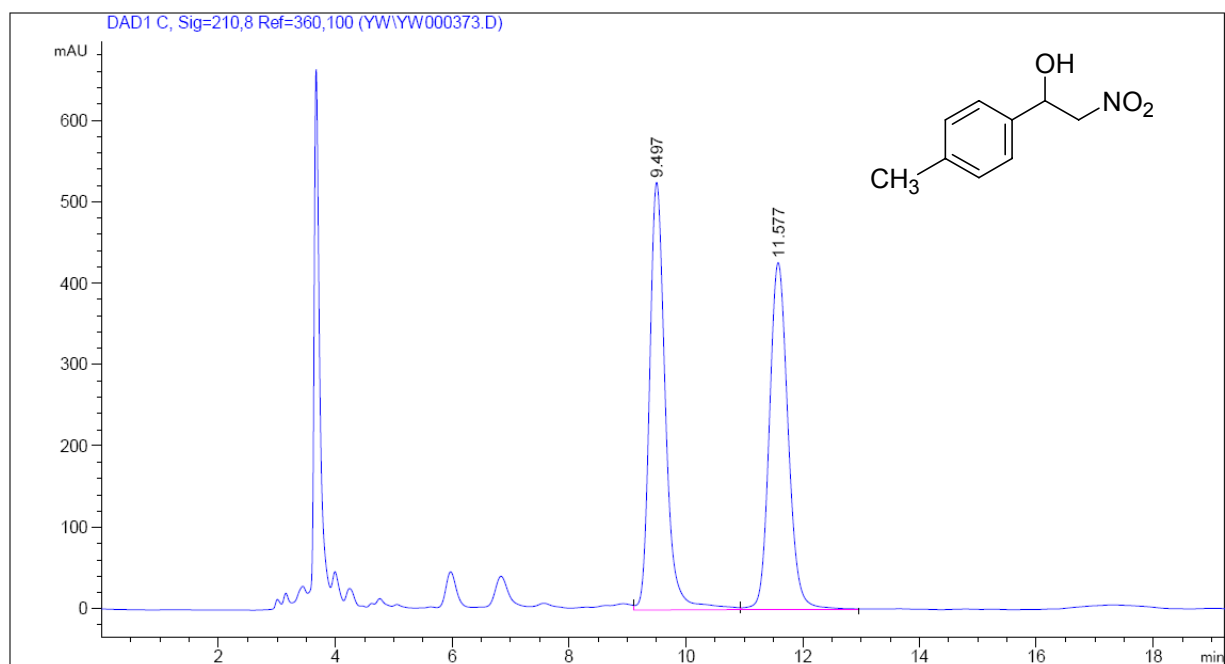

信号 1: DAD1 C, Sig=210,8 Ref=360,100

| 峰 # | 保留时间 [min] | 类型 | 峰宽 [min] | 峰面积 [mAU*s] | 峰高 [mAU]  | 峰面积 %   |
|-----|------------|----|----------|-------------|-----------|---------|
| 1   | 9.497      | VV | 0.2878   | 9895.47754  | 525.31006 | 50.9358 |
| 2   | 11.577     | VV | 0.3486   | 9531.87598  | 426.72028 | 49.0642 |

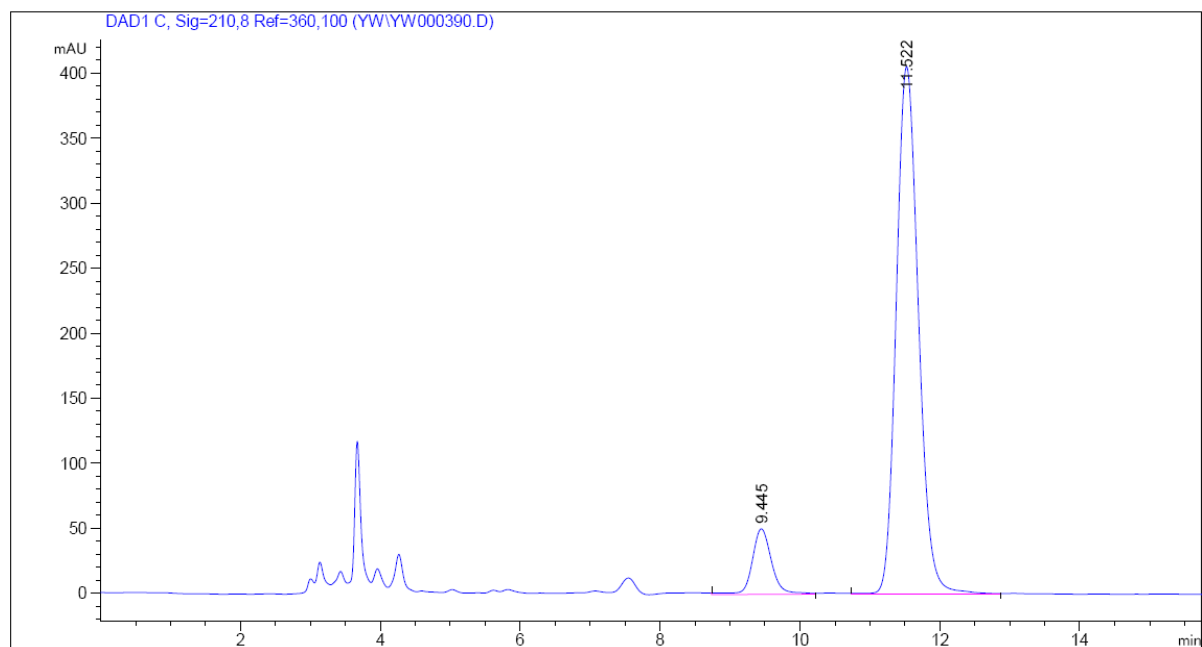

信号 1: DAD1 C, Sig=210,8 Ref=360,100

| 峰 # | 保留时间 [min] | 类型 | 峰宽 [min] | 峰面积 [mAU*s] | 峰高 [mAU]  | 峰面积 %   |
|-----|------------|----|----------|-------------|-----------|---------|
| 1   | 9.445      | VV | 0.2965   | 991.15161   | 50.61300  | 9.9293  |
| 2   | 11.522     | VV | 0.3463   | 8990.92969  | 406.05750 | 90.0707 |



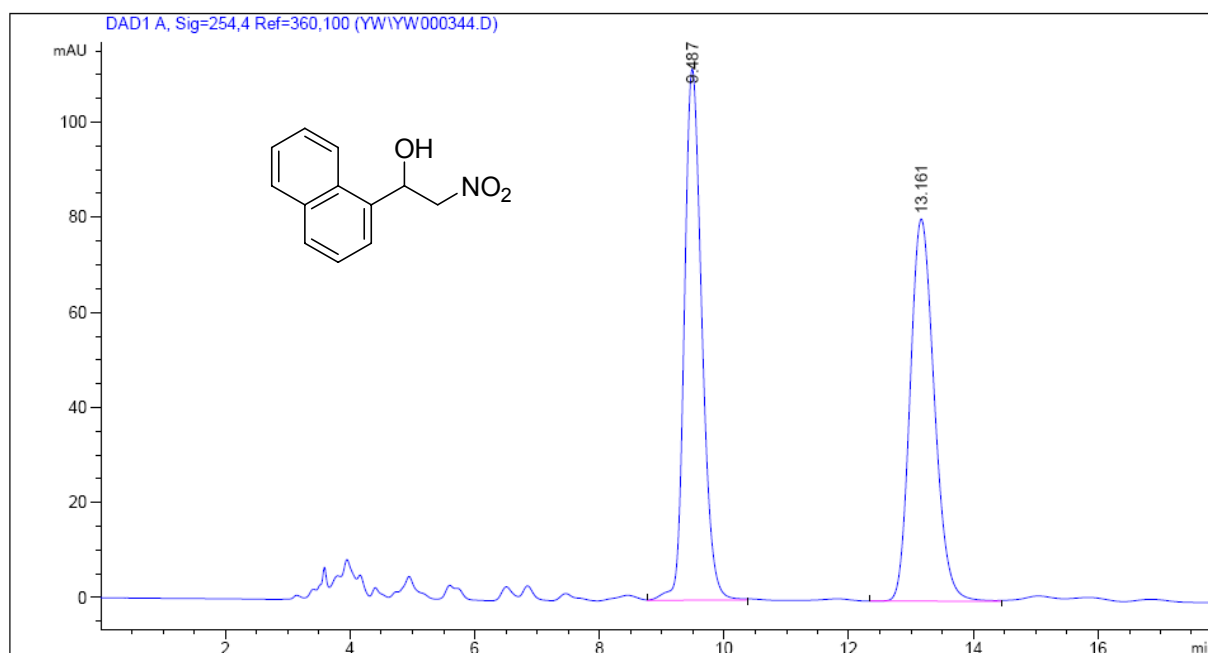

信号 1: DAD1 A, Sig=254,4 Ref=360,100

| 峰 # | 保留时间 [min] | 类型 | 峰宽 [min] | 峰面积 [mAU*s] | 峰高 [mAU]  | 峰面积 %   |
|-----|------------|----|----------|-------------|-----------|---------|
| 1   | 9.487      | VB | 0.3045   | 2189.45508  | 111.79115 | 50.2623 |
| 2   | 13.161     | VB | 0.4183   | 2166.60229  | 80.41850  | 49.7377 |

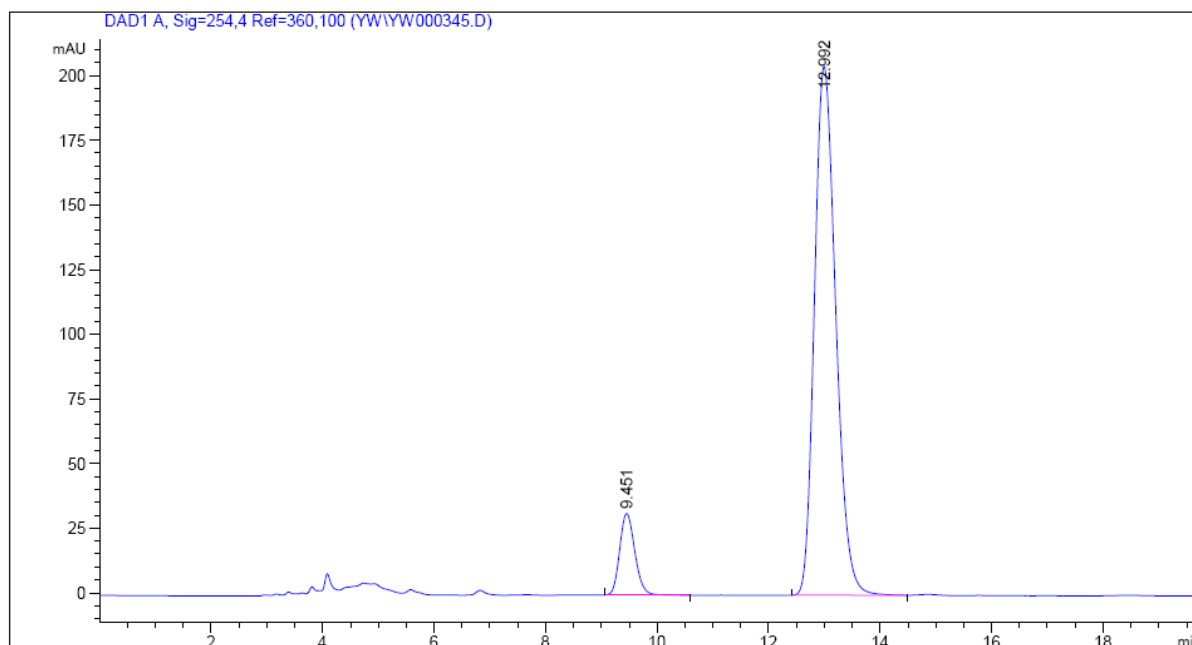

信号 1: DAD1 A, Sig=254,4 Ref=360,100

| 峰 # | 保留时间 [min] | 类型 | 峰宽 [min] | 峰面积 [mAU*s] | 峰高 [mAU]  | 峰面积 %   |
|-----|------------|----|----------|-------------|-----------|---------|
| 1   | 9.451      | BB | 0.2931   | 598.37616   | 31.56934  | 9.9137  |
| 2   | 12.992     | BV | 0.4143   | 5437.46143  | 204.41353 | 90.0863 |

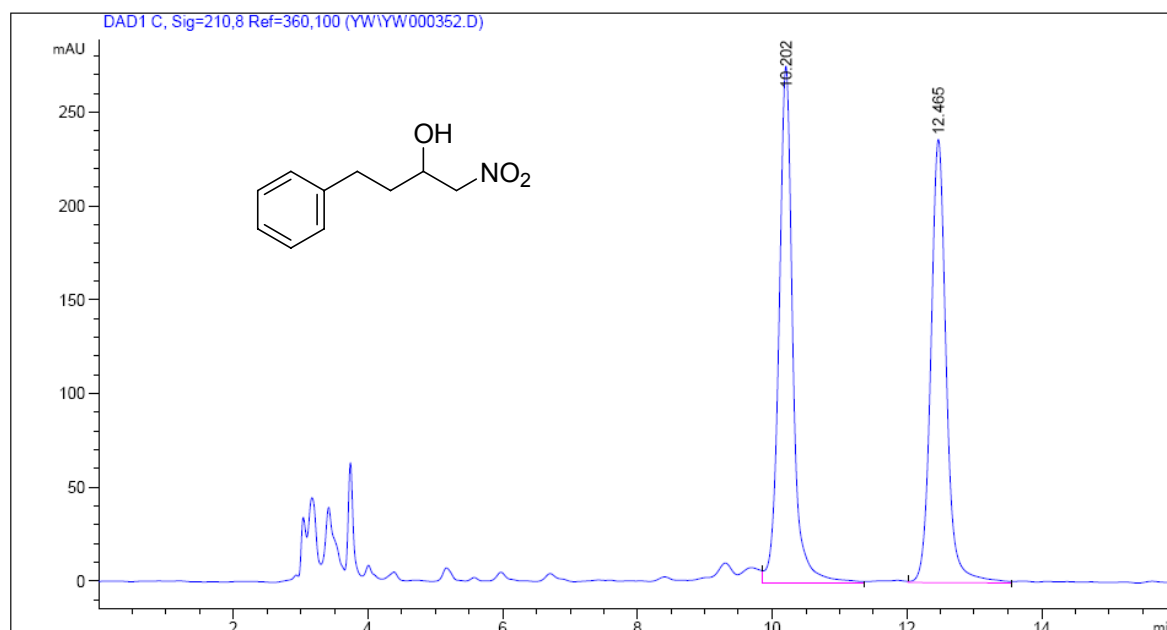

信号 1: DAD1 C, Sig=210,8 Ref=360,100

| 峰 # | 保留时间 [min] | 类型 | 峰宽 [min] | 峰面积 [mAU*s] | 峰高 [mAU]  | 峰面积 %   |
|-----|------------|----|----------|-------------|-----------|---------|
| 1   | 10.202     | VV | 0.2148   | 3936.18115  | 275.28439 | 51.1073 |
| 2   | 12.465     | VV | 0.2417   | 3765.61206  | 236.54498 | 48.8927 |

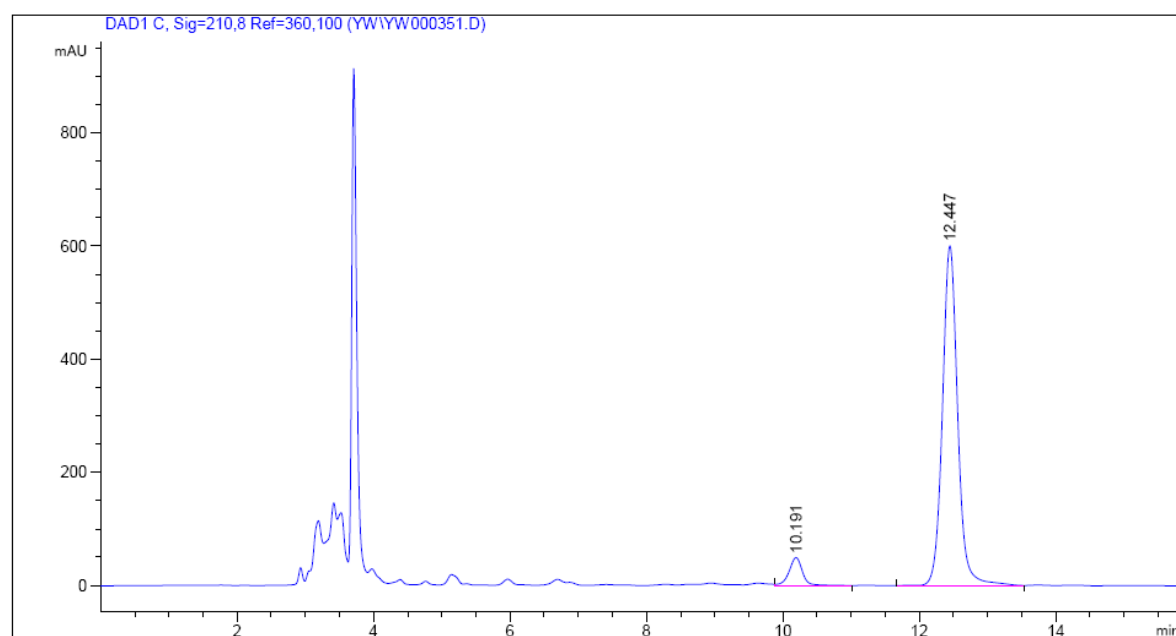

信号 1: DAD1 C, Sig=210,8 Ref=360,100

| 峰 # | 保留时间 [min] | 类型 | 峰宽 [min] | 峰面积 [mAU*s] | 峰高 [mAU]  | 峰面积 %   |
|-----|------------|----|----------|-------------|-----------|---------|
| 1   | 10.191     | VV | 0.2163   | 724.70532   | 50.22583  | 7.1516  |
| 2   | 12.447     | VV | 0.2427   | 9408.79199  | 600.83606 | 92.8484 |

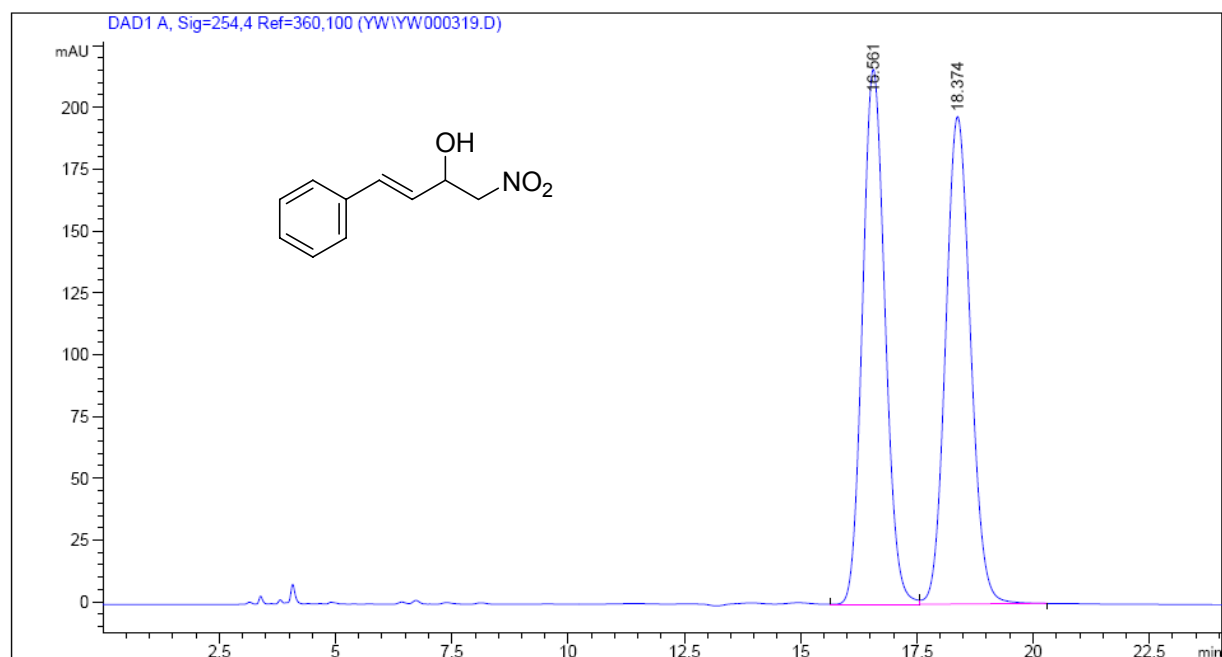

信号 1: DAD1 A, Sig=254,4 Ref=360,100

| 峰 # | 保留时间 [min] | 类型 | 峰宽 [min] | 峰面积 [mAU*s] | 峰高 [mAU]  | 峰面积 %   |
|-----|------------|----|----------|-------------|-----------|---------|
| 1   | 16.561     | VV | 0.5255   | 7301.83252  | 216.50389 | 49.8066 |
| 2   | 18.374     | VB | 0.5833   | 7358.53857  | 197.20122 | 50.1934 |

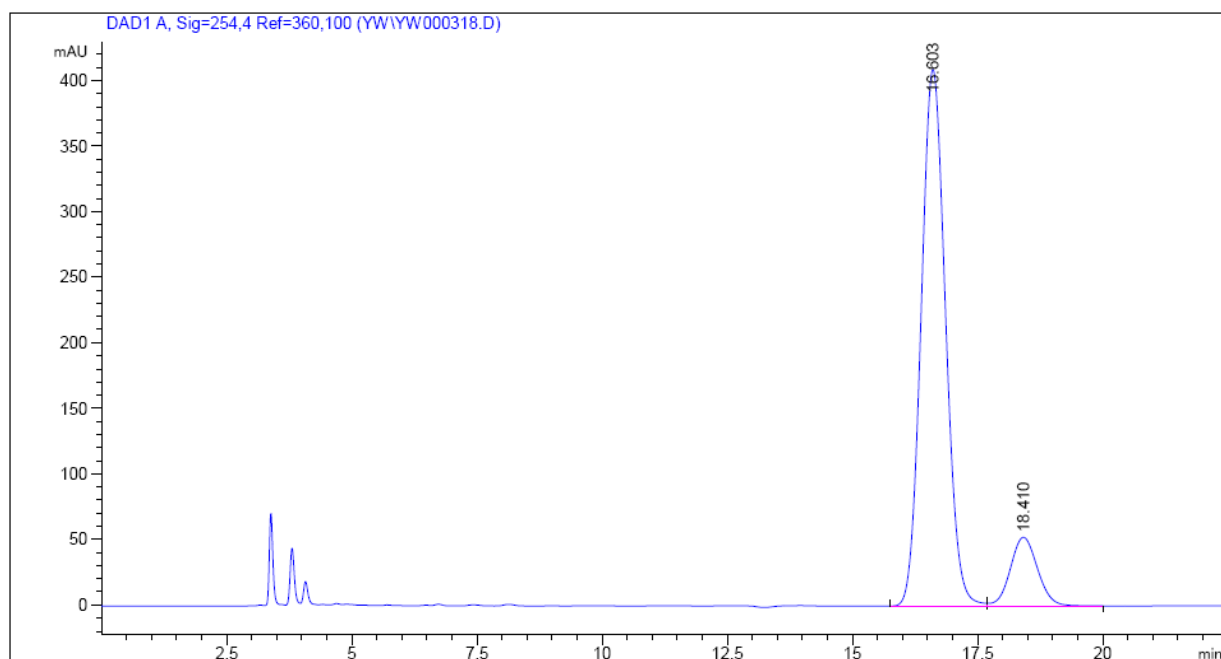

信号 1: DAD1 A, Sig=254,4 Ref=360,100

| 峰 # | 保留时间 [min] | 类型 | 峰宽 [min] | 峰面积 [mAU*s] | 峰高 [mAU]  | 峰面积 %   |
|-----|------------|----|----------|-------------|-----------|---------|
| 1   | 16.603     | BV | 0.5247   | 1.37747e4   | 409.22116 | 87.3994 |
| 2   | 18.410     | VB | 0.5898   | 1985.93591  | 52.44614  | 12.6006 |

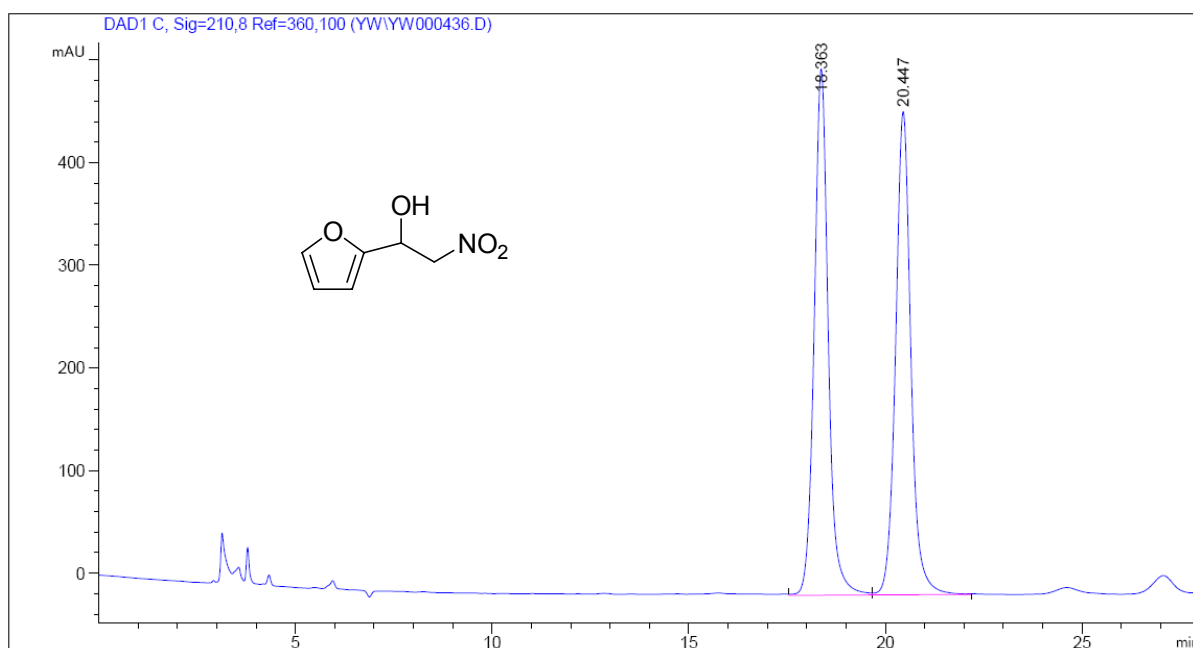

信号 1: DAD1 C, Sig=210,8 Ref=360,100

| 峰 # | 保留时间 [min] | 类型 | 峰宽 [min] | 峰面积 [mAU*s] | 峰高 [mAU]  | 峰面积 %   |
|-----|------------|----|----------|-------------|-----------|---------|
| 1   | 18.363     | VV | 0.3742   | 1.27476e4   | 512.55273 | 49.9855 |
| 2   | 20.447     | VB | 0.4081   | 1.27550e4   | 470.72137 | 50.0145 |

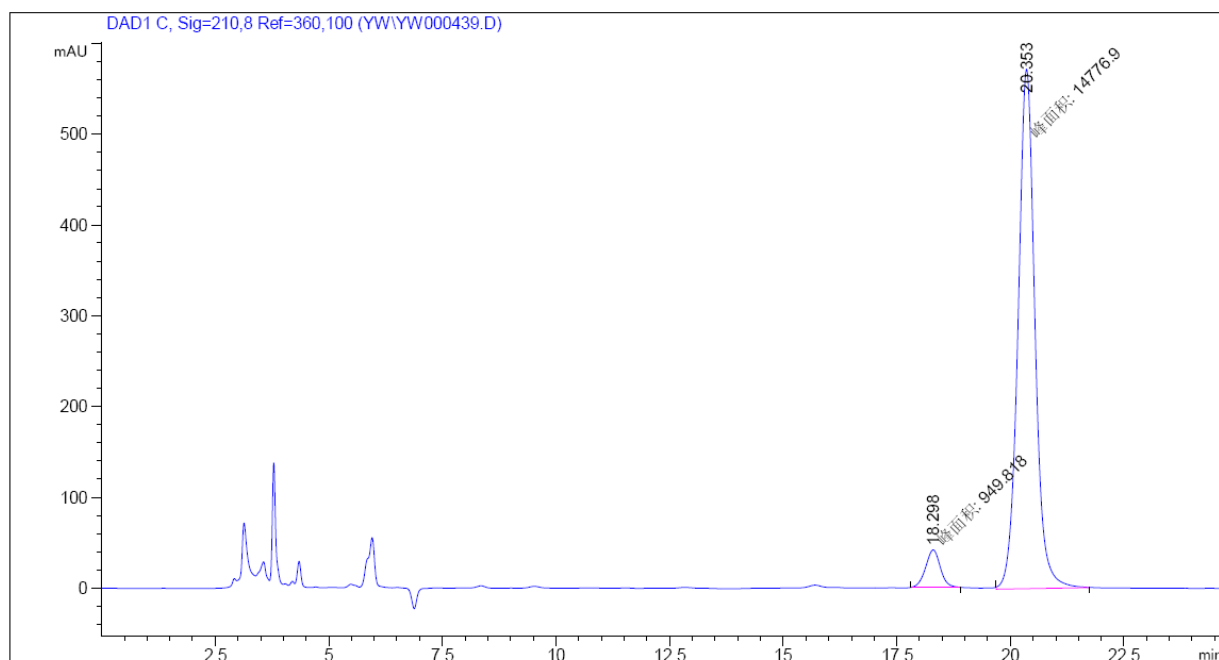

信号 1: DAD1 C, Sig=210,8 Ref=360,100

| 峰 # | 保留时间 [min] | 类型 | 峰宽 [min] | 峰面积 [mAU*s] | 峰高 [mAU]  | 峰面积 %   |
|-----|------------|----|----------|-------------|-----------|---------|
| 1   | 18.298     | MM | 0.3806   | 949.81750   | 41.59605  | 6.0395  |
| 2   | 20.353     | MM | 0.4301   | 1.47769e4   | 572.60583 | 93.9605 |

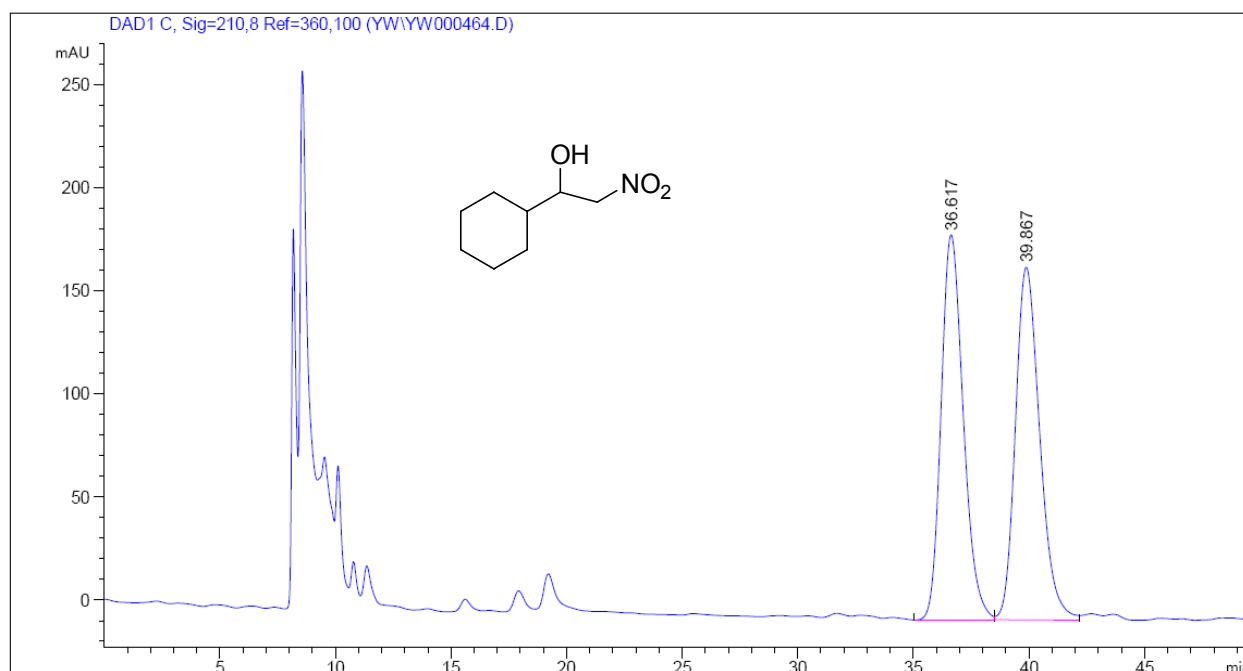

信号 1: DAD1 C, Sig=210,8 Ref=360,100

| 峰 # | 保留时间 [min] | 类型 | 峰宽 [min] | 峰面积 [mAU*s] | 峰高 [mAU]  | 峰面积 %   |
|-----|------------|----|----------|-------------|-----------|---------|
| 1   | 36.617     | VV | 1.0341   | 1.24673e4   | 186.92174 | 49.8436 |
| 2   | 39.867     | VV | 1.1268   | 1.25456e4   | 171.22792 | 50.1564 |

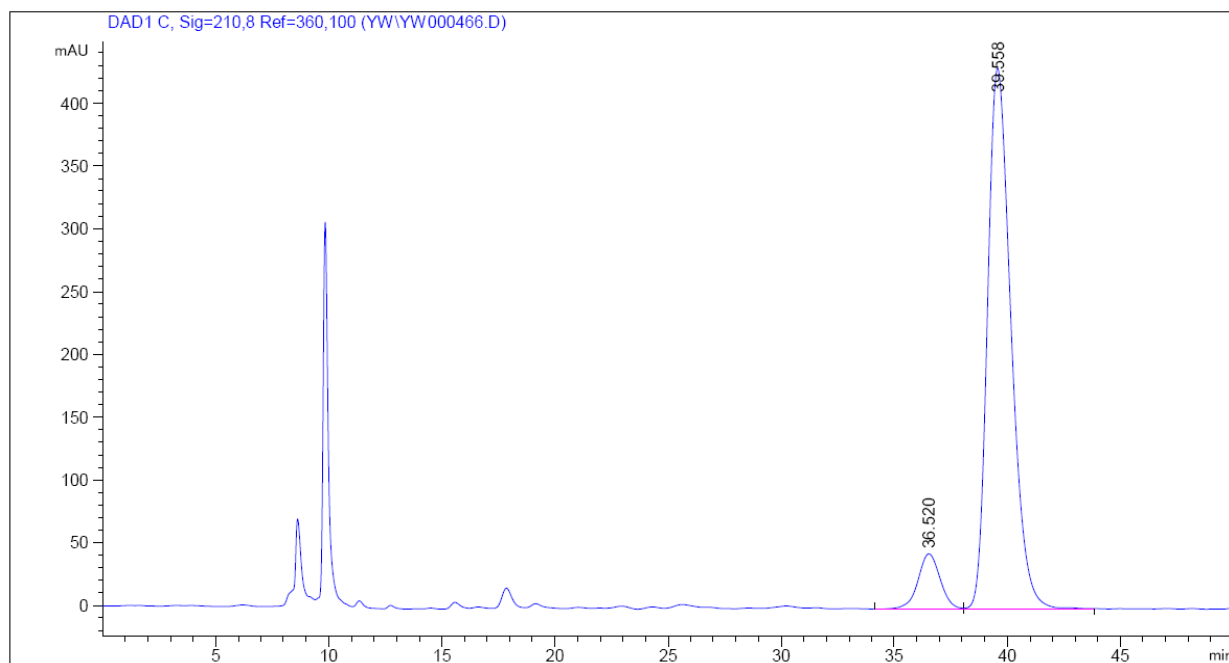

信号 1: DAD1 C, Sig=210,8 Ref=360,100

| 峰 # | 保留时间 [min] | 类型 | 峰宽 [min] | 峰面积 [mAU*s] | 峰高 [mAU]  | 峰面积 %   |
|-----|------------|----|----------|-------------|-----------|---------|
| 1   | 36.520     | VV | 1.0667   | 3034.31104  | 44.10318  | 8.8968  |
| 2   | 39.558     | VB | 1.1140   | 3.10714e4   | 430.51724 | 91.1032 |

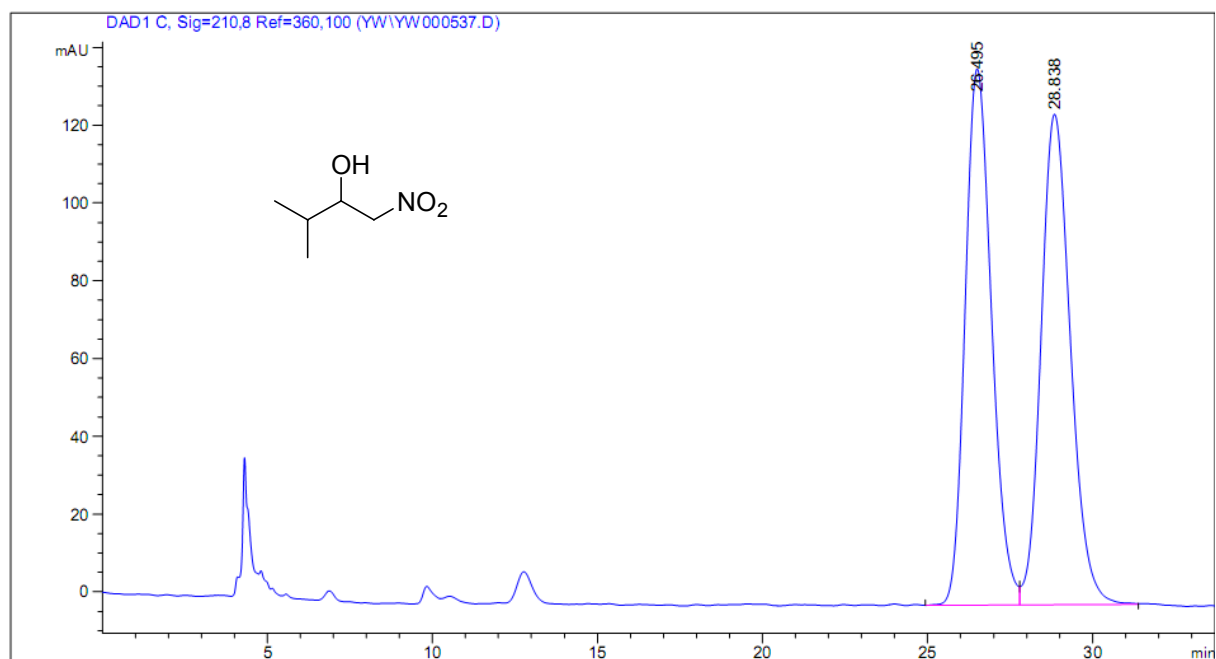

信号 1: DAD1 C, Sig=210,8 Ref=360,100

| 峰 # | 保留时间 [min] | 类型 | 峰宽 [min] | 峰面积 [mAU*s] | 峰高 [mAU]  | 峰面积 %   |
|-----|------------|----|----------|-------------|-----------|---------|
| 1   | 26.495     | VV | 0.8612   | 7676.32813  | 137.95648 | 49.5171 |
| 2   | 28.838     | VB | 0.9594   | 7826.04395  | 126.20803 | 50.4829 |

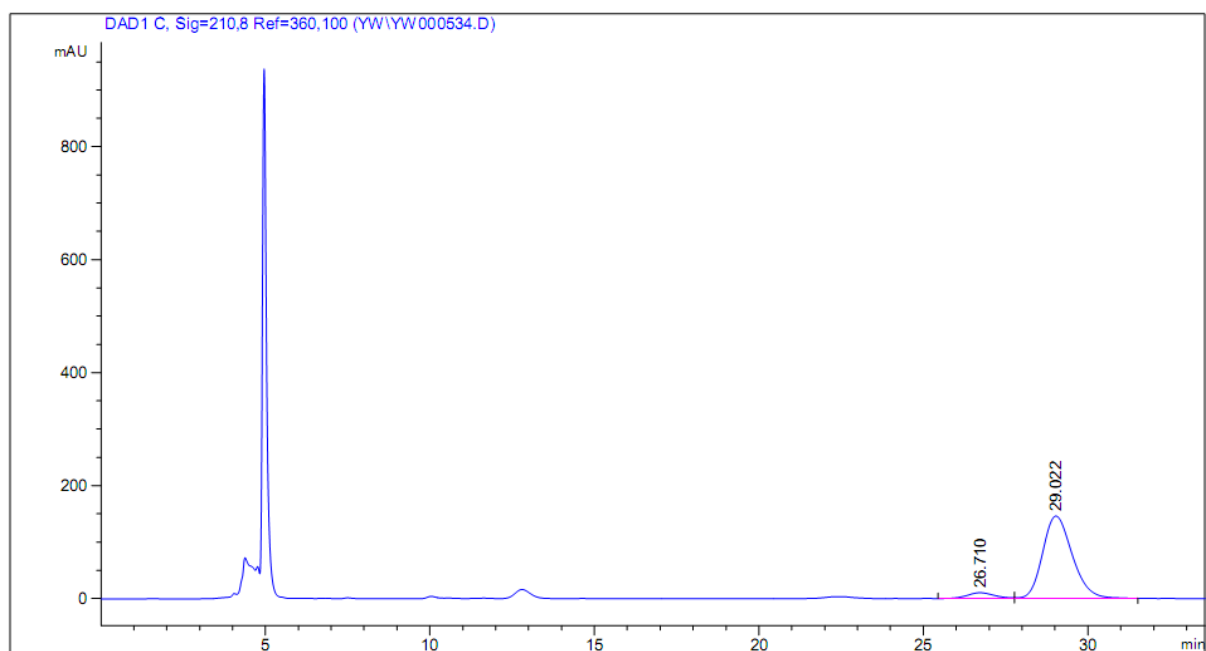

信号 1: DAD1 C, Sig=210,8 Ref=360,100

| 峰 # | 保留时间 [min] | 类型 | 峰宽 [min] | 峰面积 [mAU*s] | 峰高 [mAU]  | 峰面积 %   |
|-----|------------|----|----------|-------------|-----------|---------|
| 1   | 26.710     | VV | 0.9009   | 636.23981   | 10.59101  | 6.4658  |
| 2   | 29.022     | VB | 0.9704   | 9203.86230  | 146.21352 | 93.5342 |

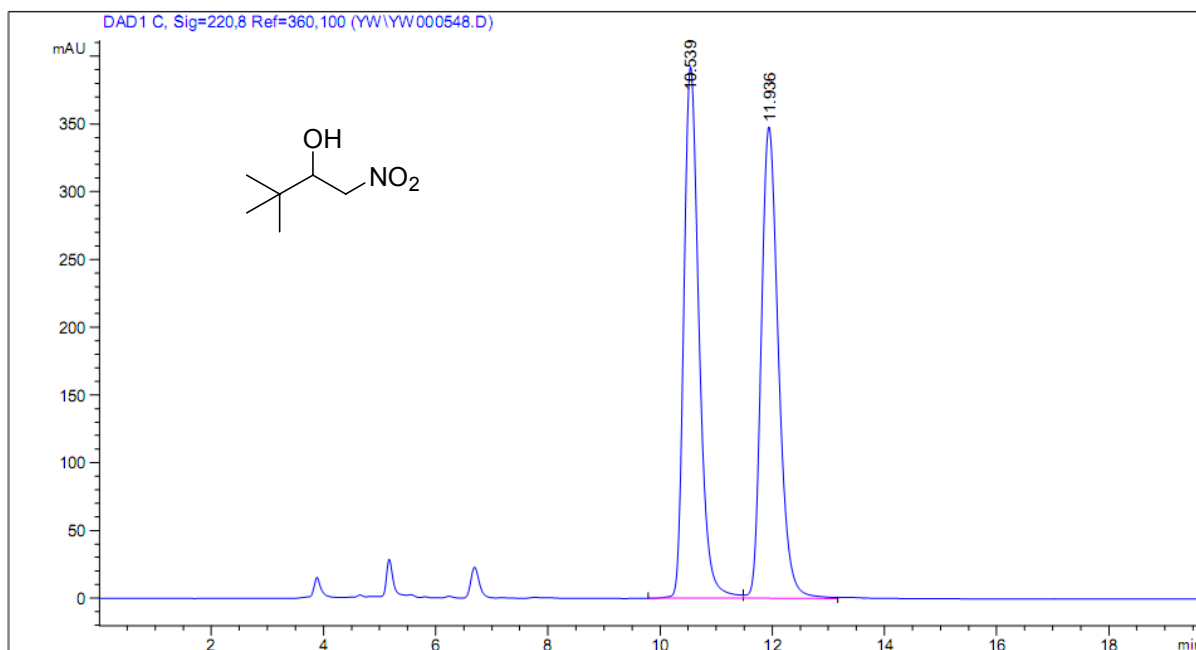

信号 1: DAD1 C, Sig=220,8 Ref=360,100

| 峰 # | 保留时间 [min] | 类型 | 峰宽 [min] | 峰面积 [mAU*s] | 峰高 [mAU]  | 峰面积 %   |
|-----|------------|----|----------|-------------|-----------|---------|
| 1   | 10.539     | BV | 0.2915   | 7379.69043  | 392.16843 | 49.8224 |
| 2   | 11.936     | VV | 0.3291   | 7432.29834  | 348.12430 | 50.1776 |

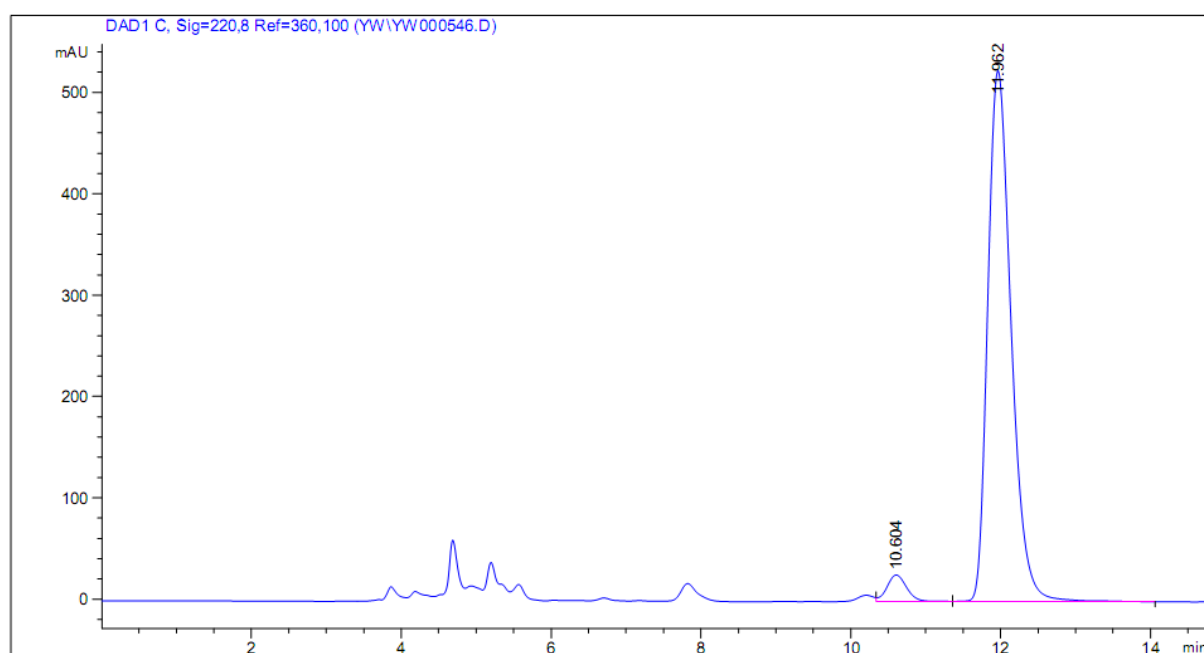

信号 1: DAD1 C, Sig=220,8 Ref=360,100

| 峰 # | 保留时间 [min] | 类型 | 峰宽 [min] | 峰面积 [mAU*s] | 峰高 [mAU]  | 峰面积 %   |
|-----|------------|----|----------|-------------|-----------|---------|
| 1   | 10.604     | VV | 0.2857   | 492.93130   | 26.41952  | 4.1615  |
| 2   | 11.962     | VB | 0.3369   | 1.13522e4   | 523.71454 | 95.8385 |

## Mass spectra of catalyst **4db**

### Peking University Mass Spectrometry Analysis Report

#### Analysis Info

Analysis Name 10010329\_20100120\_000001.d  
Sample Complex  
Comment ESI Positive

Acquisition Date 1/20/2010 1:09:24 PM  
Instrument Bruker Apex IV FTMS  
Operator Peking University

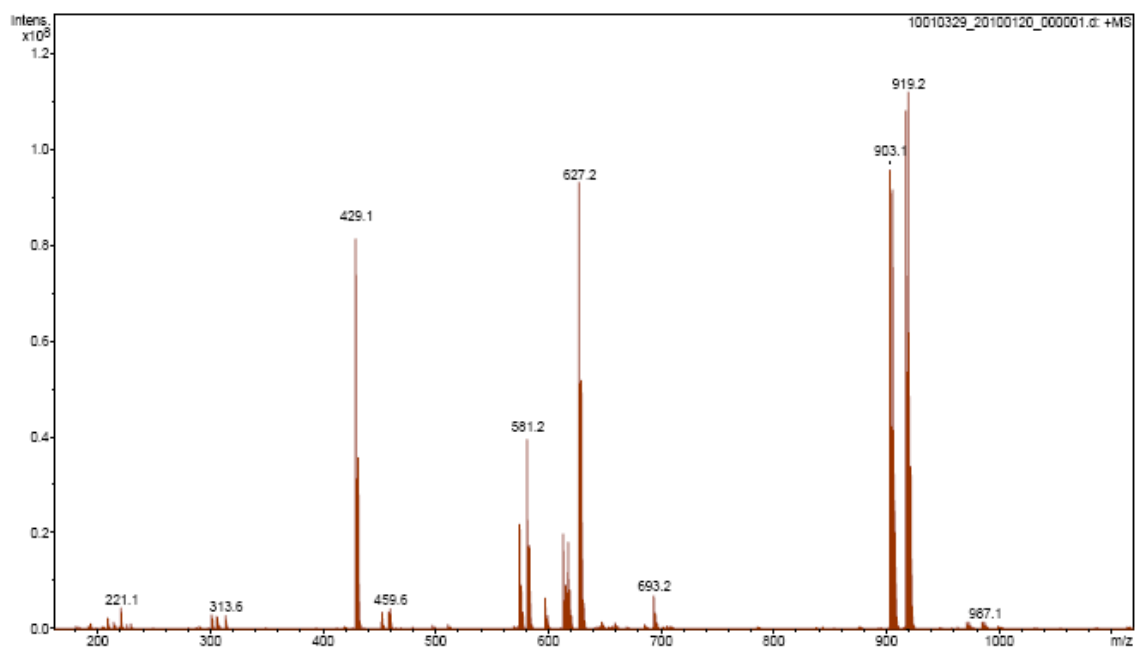

Bruker Compass DataAnalysis 4.0

printed: 1/20/2010 1:10:29 PM

Page 1 of 1
